# Supplementary material for: A sustainable innovation for the tandem synthesis of sugar-containing coumarin derivatives catalyzed by lipozyme TL IM fromThermomyces lanuginosusin continuous-flow microreactors
Source: Royal Society of Chemistry journal article supplement (doi:10.1039/d0ra00879f), 2020-01-01
Supplement: d0ra00879f1.pdf [file d0ra00879f1.pdf]

## Supporting Information for

### A sustainable innovation for the tandem synthesis of sugar-containing coumarin Derivatives Catalyzed by Lipase TL IM from *Thermomyces lanuginosus* under Continuous-flow Microreactors

Li-Hua Du,<sup>\*a</sup> Ping-Feng Chen,<sup>a</sup> Rui-Jie Long,<sup>a</sup> Miao Xue,<sup>a</sup> and Xi-Ping Luo<sup>\*b</sup>

<sup>a</sup>College of Pharmaceutical Science, Zhejiang University of Technology, Zhejiang, Hangzhou, 310014, People's Republic of China

<sup>b</sup>Zhejiang Provincial Key Laboratory of Chemical Utilization of Forestry Biomass, Zhejiang A&F University, Zhejiang, Hangzhou, 311300, China

#### Materials

Unless otherwise stated, all chemicals were obtained from commercial sources and used without further purification. Lipozyme TL IM from *Thermomyces lanuginosus* was purchased from Novo Nordisk. Salicylaldehyde, 3-Methoxysalicylaldehyde and Diethyl malonate were purchased from Aldrich, 5-Chlorosalicylaldehyde, Dimethyl malonate and Di-tert-Butyl malonate were purchased from Energy Chemical. 2,4-Dihydroxybenzaldehyde and 5-Methylsalicylaldehyde were purchased from Macklin. D-glucose, D-mannose, Sucrose, Maltose were purchased from China pharmaceutical group chemical reagents Co., Ltd. Harvard Apparatus PHD 2000 syringe pumps were purchased from Harvard.

#### Purification of the Products

When the conversion of salicylaldehyde to coumarin derivatives reached the maximum value (determined by TLC), 20 ml of water was then added to the resulting mixture, and the resulting mixture was extracted three times with 20mL of EA. The combined extracts were dried over anhydrous Na<sub>2</sub>SO<sub>4</sub> and the solvents were then removed under reduced pressure. The crude products were purified by column chromatography with petroleum ether/ethyl acetate (3:1, by vol) as eluent. The purification was monitored by TLC. The fractions containing the main products were pooled, the solvent evaporated, and the residue analyzed by <sup>1</sup>H NMR, <sup>13</sup>C NMR, ESI-MS.

When the conversion of coumarin to sugar-containing coumarin derivatives reached the maximum value (determined by TLC), the reaction was terminated by filtering the enzyme, and the tert-amyl alcohol solvent was evaporated under reduced pressure. The products (**5a**, **5b**, **5e**, **5f**, **5i**, **5j**, **5m**, **5n**, **5q**, **5r**) were eluted by

dichloromethane: methanol (10:1.5, by vol), The products (**5c**, **5d**, **5g**, **5h**, **5k**, **5l**, **5o**, **5p**, **5s**, **5t**) were eluted by dichloromethane: methanol (10:2, by vol). The purification was monitored by TLC. The fractions containing the main products were pooled, the solvent evaporated, and the residue analyzed by  $^1\text{H}$  NMR,  $^{13}\text{C}$  NMR, ESI-MS.

#### Thin-Layer Chromatography

Analytical TLC was performed on silica gel 60 plates (Merck) using ethyl acetate: methanol: water (1.7:0.2:0.1, by vol) as developing solvent. Spots were detected by ultraviolet irradiation at 254 nm.

#### Experiment

##### *General Procedure for Sugar-containing Coumarin Derivatives Synthesis in Continuous Flow Microreactors*

**Method A:** 20 mmol salicylaldehyde derivative (salicylaldehyde, 5-chlorosalicylaldehyde, 5-methylsalicylaldehyde, 2,4-dihydroxybenzaldehyde or 3-methoxysalicylaldehyde) was dissolved in 2.5 mL DMSO solution (feed **1**). 40 mmol diester malonate derivative (dimethyl malonate, diethyl malonate or di-tert-butyl malonate) was dissolved in 2.5 mL DMSO solution (feed **2**). Two solutions were put into 10 mL injector respectively. The mixture of 870 mg catalyst (104.4 mg  $\text{K}_2\text{CO}_3$  and 765.6 mg lipozyme TL IM) was filled in PFA tubing (inner diameter ID=2.0 mm, length=100 cm). Feed **1** and **2** were mixed together at  $31.2 \mu\text{L min}^{-1}$  flow rate in a Y-mixer at  $40^\circ\text{C}$  and the resulting stream ( $62.4 \mu\text{L min}^{-1}$ ) was connected to a sample vial which was used to collect the final mixture. The reaction temperature was controlled by a water bath thermostat. Then 9.48 mL tert-amyl alcohol was slowly dripped with 0.52 mL reaction solution (feed **3**). 0.5 mmol sugar compounds (D-glucose, D-mannose, sucrose or maltose) were dissolved in 0.52 mL DMSO, and 9.48 mL tert-amyl alcohol was slowly dripped (feed **4**). 870 mg lipozyme TL IM was filled in PFA tubing (inner diameter ID=2.0 mm, length=100 cm). Feed **3** and **4** were mixed together at  $7.8 \mu\text{L min}^{-1}$  flow rate in a Y-mixer at  $35^\circ\text{C}$  and the resulting stream ( $15.6 \mu\text{L min}^{-1}$ ) was connected to a sample vial which was used to collect the final mixture. The final mixture was then evaporated, and the oily residue was submitted to column chromatography on silica gel (200–300 mesh). The fractions containing the main products were pooled, the solvent evaporated, and the residue analyzed by  $^1\text{H}$  NMR,  $^{13}\text{C}$  NMR, ESI-MS.

##### *General Procedure for Sugar-containing Coumarin Derivatives Synthesis in shaker reactor.*

**Method B:** 0.25 mmol salicylaldehyde derivative (salicylaldehyde, 5-chlorosalicylaldehyde, 5-methylsalicylaldehyde, 2,4-dihydroxybenzaldehyde or 3-methoxysalicylaldehyde) was added in to 5 mL DMSO and 0.5 mmol diester malonate derivative (dimethyl malonate, diethyl malonate or di-tert-butyl malonate) was added. The 145 mg catalyst (25 mg  $\text{K}_2\text{CO}_3$  and 120 mg lipozyme TL IM) was then added and the suspension maintained at

55 °C for 16 h under shaker reactors. Aliquots were withdrawn at different times, analyzed by TLC. When the conversion of salicylaldehyde derivative to intermediates reached the maximum value (determined by TLC), the mixture was cooled and filtered. The reaction liquid was extracted by ice water and ethyl acetate, and the residue was submitted to column chromatography on silica gel (200–300 mesh). The intermediates were eluted by ethyl acetate: petroleum ether (1:3, by vol). The purification was monitored by TLC. The fractions containing the main products were pooled, the solvent evaporated. 0.5 mmol intermediates (**3b**, **3e**, **3h**, **3k**, **3n**) were added in to 0.26 mL DMSO and 0.125 mmol of sugar compounds (D-glucose, D-mannose, sucrose or maltose), slowly dripping 4.74 mL tert-amyl alcohol after full dissolution. The biocatalyst (40 mg/mL, 200 mg) was then added and the suspension maintained at 45 °C for 24 h under shaker reactors. Aliquots were withdrawn at different times, analyzed by TLC. When the conversion of sugar-containing coumarin derivatives to target products reached the maximum value (determined by TLC). The tert-amyl alcohol was evaporated under reduced pressure, and the oily residue was submitted to column chromatography on silica gel (200–300 mesh). The purification was monitored by TLC. The fractions containing the main products were pooled, the solvent evaporated, and the residue analyzed by <sup>1</sup>H NMR, <sup>13</sup>C NMR, ESI-MS.

### Exploration of Reaction

**Table S1** Continuous flow for the synthesis of coumarin derivatives<sup>a</sup>

Reaction scheme: Salicylaldehyde derivative **1** (with substituents R<sub>1</sub>, R<sub>2</sub>, R<sub>3</sub>) reacts with diethyl malonate derivative **2** (with substituent R<sub>4</sub>) in the presence of Lipozyme TL IM / K<sub>2</sub>CO<sub>3</sub> in DMSO at 40 °C for 10 min to yield coumarin derivative **3** (with substituents R<sub>1</sub>, R<sub>2</sub>, R<sub>3</sub>, R<sub>4</sub>).

| Entry | R <sub>1</sub>  | R <sub>2</sub> | R <sub>3</sub>   | R <sub>4</sub>                   | Product   | Yield <sup>b</sup> (%) |
|-------|-----------------|----------------|------------------|----------------------------------|-----------|------------------------|
| 1     | H               | H              | H                | CH <sub>2</sub> CH <sub>3</sub>  | <b>3a</b> | 92                     |
| 2     | H               | H              | H                | CH <sub>3</sub>                  | <b>3b</b> | 94                     |
| 3     | H               | H              | H                | C(CH <sub>3</sub> ) <sub>3</sub> | <b>3c</b> | 66                     |
| 4     | Cl              | H              | H                | CH <sub>2</sub> CH <sub>3</sub>  | <b>3d</b> | 91                     |
| 5     | Cl              | H              | H                | CH <sub>3</sub>                  | <b>3e</b> | 94                     |
| 6     | Cl              | H              | H                | C(CH <sub>3</sub> ) <sub>3</sub> | <b>3f</b> | 64                     |
| 7     | CH <sub>3</sub> | H              | H                | CH <sub>2</sub> CH <sub>3</sub>  | <b>3g</b> | 94                     |
| 8     | CH <sub>3</sub> | H              | H                | CH <sub>3</sub>                  | <b>3h</b> | 95                     |
| 9     | CH <sub>3</sub> | H              | H                | C(CH <sub>3</sub> ) <sub>3</sub> | <b>3i</b> | 68                     |
| 10    | H               | H              | OCH <sub>3</sub> | CH <sub>2</sub> CH <sub>3</sub>  | <b>3j</b> | 87                     |
| 11    | H               | H              | OCH <sub>3</sub> | CH <sub>3</sub>                  | <b>3k</b> | 89                     |
| 12    | H               | H              | OCH <sub>3</sub> | C(CH <sub>3</sub> ) <sub>3</sub> | <b>3l</b> | 58                     |

|    |   |    |   |                                  |           |    |
|----|---|----|---|----------------------------------|-----------|----|
| 13 | H | OH | H | CH <sub>2</sub> CH <sub>3</sub>  | <b>3m</b> | 78 |
| 14 | H | OH | H | CH <sub>3</sub>                  | <b>3n</b> | 84 |
| 15 | H | OH | H | C(CH <sub>3</sub> ) <sub>3</sub> | <b>3o</b> | 55 |

<sup>a</sup> Reaction conditions: feed **1**, salicylaldehyde derivative (2 mmol) was dissolved in 10 mL DMSO; feed **2**, diester malonate derivative (1 mmol) was dissolved in 10 mL DMSO, reacted in continuous flow microreactors catalyzed by mixed catalyst K<sub>2</sub>CO<sub>3</sub>/lipozyme TL IM (104.4 mg K<sub>2</sub>CO<sub>3</sub> and 765.6 mg lipozyme TL IM) at 40 °C for 10 min. <sup>b</sup> Isolated yields.

#### Experimental data of products

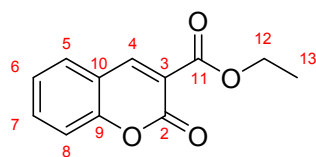

**Ethyl coumarin-3-carboxylate (3a)**<sup>S1</sup>: white solid; <sup>1</sup>H NMR (500 MHz, Chloroform-*d*) δ 8.54 (s, 1H, H-4), 7.68 – 7.61 (m, 2H, H-5, H-7), 7.39 – 7.33 (m, 2H, H-6, H-8), 4.43 (q, *J* = 7.1 Hz, 2H, H-12), 1.42 (t, *J* = 7.1 Hz, 3H, H-13). <sup>13</sup>C NMR (126 MHz, CDCl<sub>3</sub>) δ 163.06 (C-11), 156.71 (C-2), 155.16 (C-9), 148.59 (C-4), 134.32 (C-7), 129.48 (C-5), 124.83 (C-6), 118.34 (C-10), 117.88 (C-3), 116.80 (C-8), 62.00 (C-12), 14.24 (C-13).

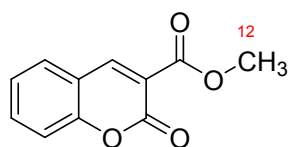

**Methyl coumarin-3-carboxylate (3b)**<sup>S1</sup>: white solid; <sup>1</sup>H NMR (500 MHz, Chloroform-*d*) δ 8.58 (s, 1H, H-4), 7.69 – 7.61 (m, 2H, H-5, H-7), 7.39 – 7.33 (m, 2H, H-6, H-8), 3.96 (s, 3H, H-12). <sup>13</sup>C NMR (126 MHz, CDCl<sub>3</sub>) δ 163.71 (C-11), 156.70 (C-2), 155.22 (C-9), 149.17 (C-4), 134.49 (C-7), 129.57 (C-5), 124.90 (C-6), 117.93 (C-10), 117.85 (C-8), 116.81 (C-3), 52.94 (C-12).

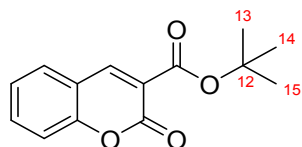

**Tert-butyl coumarin-3-carboxylate (3c)**<sup>S2</sup>: white solid; <sup>1</sup>H NMR (500 MHz, Chloroform-*d*) δ 8.40 (s, 1H, H-4), 7.65 – 7.58 (m, 2H, H-5, H-7), 7.36 – 7.31 (m, 2H, H-6, H-8), 1.61 (s, 9H, H-13, H-14, H-15). <sup>13</sup>C NMR (126 MHz, CDCl<sub>3</sub>) δ 161.93 (C-11), 156.83 (C-2), 155.02 (C-9), 147.43 (C-4), 133.92 (C-7), 129.30 (C-5), 124.67 (C-6), 119.69 (C-10), 117.96 (C-8), 116.70 (C-3), 82.83 (C-12), 28.11 (3C, C-13, C-14, C-15).

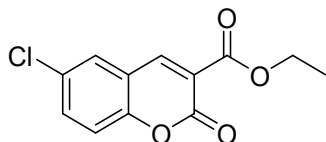

**Ethyl 6-chlorocoumarin-3-carboxylate (3d)**<sup>S1</sup>: white solid; <sup>1</sup>H NMR (500 MHz, Chloroform-*d*) δ 8.45 (s, 1H, H-4), 7.62 – 7.58 (m, 2H, H-5, H-7), 7.35 – 7.31 (m, 1H, H-8), 4.44 (q, *J* = 7.1 Hz, 2H, H-12), 1.43 (t, *J* = 7.1 Hz, 3H, H-13). <sup>13</sup>C NMR (126 MHz, CDCl<sub>3</sub>) δ 162.70 (C-11), 156.06 (C-2), 153.50 (C-9), 147.14 (C-4), 134.17 (C-7), 130.17 (C-5), 128.45 (C-6), 119.56 (C-10), 118.84 (C-3), 118.30 (C-8), 62.25 (C-12), 14.22 (C-13).

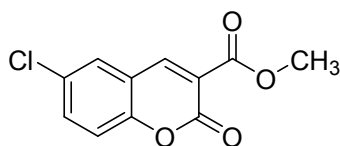

**Methyl 6-chlorocoumarin-3-carboxylate (3e)**<sup>S1</sup>: white solid; <sup>1</sup>H NMR (500 MHz, DMSO-*d*<sub>6</sub>) δ 8.75 (s, 1H, H-4), 8.07 (d, *J* = 2.6 Hz, 1H, H-5), 7.79 (dd, *J* = 8.9, 2.6 Hz, 1H, H-7), 7.50 (d, *J* = 8.9 Hz, 1H, H-8), 3.85 (s, 3H, H-12). <sup>13</sup>C NMR (126 MHz, DMSO) δ 162.83 (C-11), 155.48 (C-2), 153.17 (C-9), 147.66 (C-4), 133.89 (C-7), 129.08 (C-5), 128.45 (C-6), 119.14 (C-10), 118.51 (C-8), 118.18 (C-3), 52.52 (C-12).

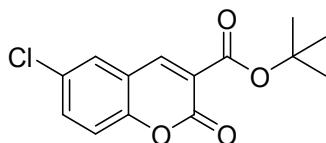

**Tert-butyl 6-chlorocoumarin-3-carboxylate (3f)**: white solid; <sup>1</sup>H NMR (500 MHz, Chloroform-*d*) δ 8.38 (s, 1H, H-4), 7.60 – 7.56 (m, 2H, H-5, H-7), 7.33 – 7.30 (m, 1H, H-8), 1.60 (s, 9H, H-13, H-14, H-15). <sup>13</sup>C NMR (126 MHz, CDCl<sub>3</sub>) δ 162.65 (C-11), 156.26 (C-2), 153.51 (C-9), 147.02 (C-4), 134.25 (C-7), 130.30 (C-5), 128.44 (C-6), 119.68 (C-10), 118.97 (C-8), 118.43 (C-3), 82.90 (C-12), 28.12 (3C, C-13, C-14, C-15).

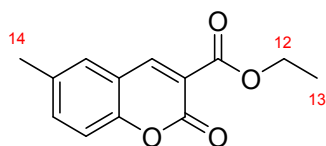

**Ethyl 6-methylcoumarin-3-carboxylate (3g)**<sup>S1</sup>: white solid; <sup>1</sup>H NMR (500 MHz, Chloroform-*d*) δ 8.59 (s, 1H, H-4), 7.48 (dd, *J* = 8.6, 2.0 Hz, 1H, H-7), 7.41 (d, *J* = 2.0 Hz, 1H, H-5), 7.26 (d, *J* = 8.6 Hz, 1H, H-8), 4.39 (q, *J* = 7.1 Hz, H-12), 2.43 (s, 3H, H-14), 1.40 (t, *J* = 7.1 Hz, 3H, H-13). <sup>13</sup>C NMR (126 MHz, CDCl<sub>3</sub>) δ 163.12 (C-11), 157.43 (C-2), 153.08 (C-9), 148.71 (C-4), 135.30 (C-6), 135.04 (C-7), 129.31 (C-5), 117.76 (C-3), 117.53 (C-10), 115.79 (C-8), 61.49 (C-12), 19.21 (C-14), 13.51 (C-13).

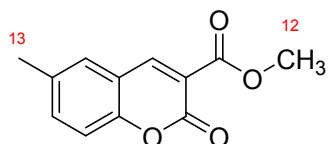

**Methyl 6-methylcoumarin-3-carboxylate (3h)**<sup>S1</sup>: white solid; <sup>1</sup>H NMR (500 MHz, Chloroform-*d*) δ 8.51 (s, 1H, H-4), 7.46 (dd, *J* = 8.6, 2.1 Hz, 1H, H-7), 7.39 (d, *J* = 2.1 Hz, 1H, H-5), 7.25 (d, *J* = 8.6 Hz, 1H, H-8), 3.95 (s, 3H, H-12), 2.43 (s, 3H, H-13). <sup>13</sup>C NMR (126 MHz, CDCl<sub>3</sub>) δ 163.84 (C-11), 156.94 (C-2), 153.39 (C-9), 149.15 (C-4), 135.63 (C-6), 134.73 (C-7), 129.15 (C-5), 117.73 (C-10), 117.60 (C-8), 116.49 (C-3), 52.86 (C-12), 20.68 (C-13).

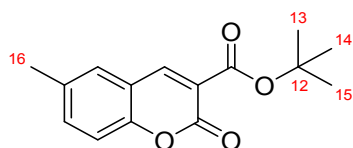

**Tert-butyl 6-methylcoumarin-3-carboxylate (3i)**<sup>S2</sup>: white solid; <sup>1</sup>H NMR (500 MHz, Chloroform-*d*) δ 8.50 (s, 1H, H-4), 7.45 (dd, *J* = 8.5, 2.0 Hz, 1H, H-7), 7.41 (d, *J* = 2.0 Hz, 1H, H-5), 7.24 (d, *J* = 8.5 Hz, 1H, H-8), 2.43 (s, 3H, H-16), 1.60 (s, 9H, H-13, H-14, H-15). <sup>13</sup>C NMR (126 MHz, CDCl<sub>3</sub>) δ 162.99 (C-11), 157.43 (C-2), 153.10 (C-9), 148.65 (C-4), 135.21 (C-6), 135.11 (C-7), 129.44 (C-5), 117.82 (C-10), 117.46 (C-8), 115.68 (C-3), 82.70 (C-12), 28.01 (3C, C-13, C-14, C-15), 19.20 (C-16).

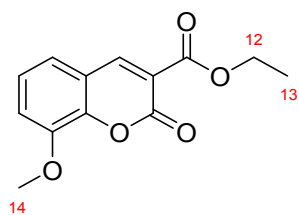

**Ethyl 8-methoxycoumarin-3-carboxylate (3j)**<sup>S3</sup>: light yellow solid; <sup>1</sup>H NMR (500 MHz, Chloroform-*d*) δ 8.50 (s, 1H, H-4), 7.30 – 7.23 (m, 1H, H-5), 7.19-7.17 (m, 2H, H-6, H-7), 4.42 (q, *J* = 7.1 Hz, 2H, H-12), 3.98 (s, 3H, H-14), 1.41 (t, *J* = 7.1 Hz, 3H, H-13). <sup>13</sup>C NMR (126 MHz, CDCl<sub>3</sub>) δ 163.09 (C-11), 156.11 (C-2), 148.77 (C-8), 147.06 (C-9), 144.87 (C-4), 124.66 (C-6), 120.57 (C-5), 118.53 (C-3), 118.45 (C-7), 115.78 (C-10), 61.96 (C-12), 56.31 (C-14), 14.22 (C-13).

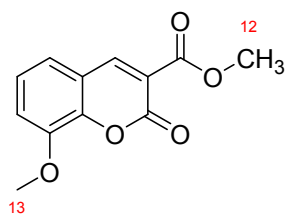

**Methyl 8-methoxycoumarin-3-carboxylate (3k)**<sup>S4</sup>: light yellow solid; <sup>1</sup>H NMR (500 MHz, Chloroform-*d*) δ 8.56 (s, 1H, H-4), 7.29-7.28 (m, 1H, H-5), 7.20-7.18 (m, 2H, H-6, H-7), 3.98 (s, 3H, H-13), 3.96 (s, 3H, H-12). <sup>13</sup>C NMR

(126 MHz, CDCl<sub>3</sub>) δ 163.83 (C-11), 156.14 (C-2), 149.41 (C-8), 147.10 (C-9), 144.96 (C-4), 124.74 (C-6), 120.65 (C-5), 118.45 (C-3), 118.17 (C-7), 115.90 (C-10), 56.33 (C-13), 52.94 (C-12).

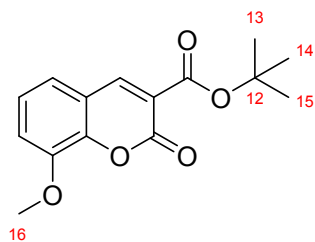

**Tert-butyl 8-methoxycoumarin-3-carboxylate (3l):** light yellow solid; <sup>1</sup>H NMR (500 MHz, Chloroform-*d*) δ 8.53 (s, 1H, H-4), 7.29-7.25 (m, 1H, H-5), 7.20-7.17 (m, 2H, H-6, H-7), 3.97 (s, 3H, H-16), 1.61 (s, 9H, H-13, H-14, H-15). <sup>13</sup>C NMR (126 MHz, CDCl<sub>3</sub>) δ 162.98 (C-11), 156.07 (C-2), 148.92 (C-8), 147.00 (C-9), 144.78 (C-4), 124.53 (C-6), 120.51 (C-5), 118.59 (C-3), 118.40 (C-7), 115.67 (C-10), 82.81 (C-12), 56.32 (C-16), 28.02 (3C, C-13, C-14, C-15).

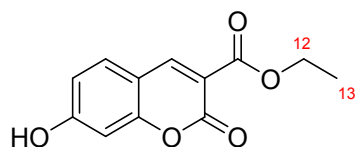

**Ethyl 7-hydroxycoumarin-3-carboxylate (3m)** <sup>S3</sup>: light yellow solid; <sup>1</sup>H NMR (500 MHz, DMSO-*d*<sub>6</sub>) δ 8.71 (s, 1H, H-4), 7.75 (d, *J* = 8.6 Hz, 1H, H-5), 6.85 (dd, *J* = 8.6, 2.3 Hz, 1H, H-6), 6.74 (d, *J* = 2.3 Hz, 1H, H-8), 4.38 (q, *J* = 7.1 Hz, 2H, H-12), 1.41 (t, *J* = 7.1 Hz, 3H, H-13). <sup>13</sup>C NMR (126 MHz, DMSO) δ 164.52 (C-11), 163.61 (C-7), 158.40 (C-2), 157.74 (C-9), 149.88 (C-4), 131.39 (C-5), 114.64 (C-10), 112.20 (C-3), 110.78 (C-6), 102.36 (C-8), 61.53 (C-12), 13.94 (C-13).

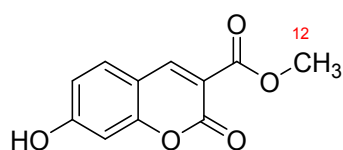

**Methyl 7-hydroxycoumarin-3-carboxylate (3n)** <sup>S5</sup>: light yellow solid; <sup>1</sup>H NMR (500 MHz, DMSO-*d*<sub>6</sub>) δ 8.70 (s, 1H, H-4), 7.76 (d, *J* = 8.6 Hz, 1H, H-5), 6.85 (dd, *J* = 8.6, 2.3 Hz, 1H, H-6), 6.73 (dd, *J* = 2.2, 0.6 Hz, 1H, H-8), 3.80 (s, 3H, H-12). <sup>13</sup>C NMR (126 MHz, DMSO) δ 164.19 (C-11), 163.51 (C-7), 157.17 (C-2), 156.39 (C-9), 149.76 (C-4), 132.18 (C-5), 114.06 (C-10), 111.76 (C-3), 110.44 (C-6), 101.80 (C-8), 52.13 (C-12).

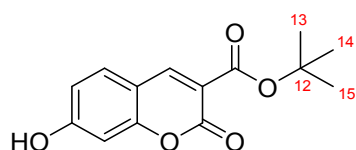

**Tert-butyl 7-hydroxycoumarin-3-carboxylate (3o):** light yellow solid; <sup>1</sup>H NMR (500 MHz, DMSO-*d*<sub>6</sub>) δ 8.67 (s, 1H, H-4), 7.76 (d, *J* = 8.5 Hz, 1H, H-5), 6.88 (dd, *J* = 8.5, 2.2 Hz, 1H, H-6), 6.73 (d, *J* = 2.2, Hz, 1H, H-8), 1.60 (s,

9H, H-13, H-14, H-15).  $^{13}\text{C}$  NMR (126 MHz, DMSO)  $\delta$  164.55 (C-11), 163.62 (C-7), 158.50 (C-2), 157.89 (C-9), 149.92 (C-4), 131.23 (C-5), 114.64 (C-10), 112.21 (C-3), 110.78 (C-6), 102.18 (C-8), 82.84 (C-12), 28.09 (3C, C-13, C-14, C-15).

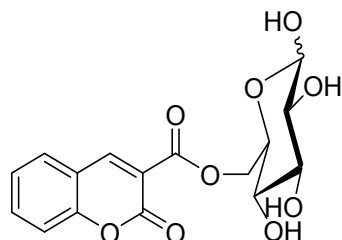

**6'-O-D-glucosyl coumarin-3-carboxylate (5a)** : white solid, mp 200-203 °C;  $^1\text{H}$  NMR (500 MHz, DMSO- $d_6$ )  $\delta$  8.71 (s, 0.28H, H-4 of  $\beta$ -D-glucose), 8.69 (s, 0.72H, H-4 of  $\alpha$ -D-glucose), 7.94-7.89 (m, 1H, H-5), 7.78-7.72 (m, 1H, H-7), 7.45-7.40 (m, 2H, H-8, H-6), 6.71 (d,  $J = 6.7$  Hz, 0.28H, C1'-OH of  $\beta$ -D-glucose), 6.38 (d,  $J = 3.7$  Hz, 0.72H, C1'-OH of  $\alpha$ -D-glucose),  $\delta$  5.20 (d,  $J = 4.9$  Hz, 0.28H, C1'-H of  $\beta$ -D-glucose), 5.14 (d,  $J = 5.6$  Hz, 0.72H, C1'-H of  $\alpha$ -D-glucose), 5.00 (d,  $J = 3.9$  Hz, 0.28H, C4'-OH of  $\beta$ -D-glucose), 4.96-4.93 (m, 1H, C2'-OH of  $\beta$ -D-glucose, C4'-OH of  $\alpha$ -D-glucose), 4.80 (d,  $J = 4.7$  Hz, 0.72H, C2'-OH of  $\beta$ -D-glucose), 4.57 (d,  $J = 6.6$  Hz, 0.72H, C3'-OH of  $\alpha$ -D-glucose), 4.54 (dd,  $J = 11.8, 1.9$  Hz, 0.28H, C6'-Ha of  $\beta$ -D-glucose), 4.49 (dd,  $J = 11.7, 2.1$  Hz, 0.72H, C6'-Ha of  $\alpha$ -D-glucose), 4.36 (dd,  $J = 7.7, 6.5$  Hz, 0.28H, C3'-OH of  $\beta$ -D-glucose), 4.34-4.27 (m, 1H, C6'-Hb of D-glucose), 3.93 (ddd,  $J = 10.1, 6.0, 2.1$  Hz, 0.72H, C5'-H of  $\alpha$ -D-glucose), 3.53-3.47 (m, 1H, C3'-H of  $\alpha$ -D-glucose, C5'-H of  $\beta$ -D-glucose), 3.25 – 3.17 (m, 2H, C2'-H, C4'-H of  $\alpha$ -D-glucose, C2'-H, C3'-H of  $\beta$ -D-glucose), 2.97 (td,  $J = 8.0, 4.2$  Hz, 0.28H, C4'-H of  $\beta$ -D-glucose).  $^{13}\text{C}$  NMR (126 MHz, DMSO)  $\delta$  162.53, 162.49 (C-11), 155.93 (C-2), 154.55, 154.53 (C-9), 148.65, 148.54 (C-4), 134.58, 134.56 (C-7), 130.27 (C-5), 124.88 (C-6), 117.72 (C-10), 117.69, 117.61 (C-8), 116.20 (C-3), 97.00 (C-1' of  $\beta$ -D-glucose), 92.38 (C-1' of  $\alpha$ -D-glucose), 76.46 (C-3' of  $\beta$ -D-glucose), 74.71 (C-2' of  $\beta$ -D-glucose), 73.49 (C-5' of  $\beta$ -D-glucose), 72.91 (C-3' of  $\alpha$ -D-glucose), 72.16 (C-2' of  $\alpha$ -D-glucose), 70.57 (C-4' of  $\alpha$ -D-glucose), 70.17 (C-4' of  $\beta$ -D-glucose), 69.20 (C-5' of  $\alpha$ -D-glucose), 65.22 (C-6' of D-glucose). HRMS:  $\text{C}_{16}\text{H}_{16}\text{O}_9\text{Na}$  for  $[\text{M}+\text{Na}]^+$ , calculated 375.0692, found 375.0693.

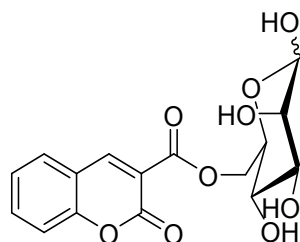

**6'-O-D-mannosyl coumarin-3-carboxylate (5b)** : white solid, mp 171-172 °C;  $^1\text{H}$  NMR (500 MHz, DMSO- $d_6$ )  $\delta$  8.74 (s, 1H, H-4), 7.89 (dd,  $J = 7.8, 1.6$  Hz, 1H, H-5), 7.76 (ddd,  $J = 8.7, 7.3, 1.6$  Hz, 1H, H-7), 7.49 – 7.40 (m, 2H,



H-8, H-6), 6.41 (d,  $J = 4.4$  Hz, 1H, C1'-OH of D-mannose), 5.01 (d,  $J = 5.6$  Hz, 1H, C1'-H of D-mannose), 4.90 (d,  $J = 4.4$  Hz, 1H, C4'-OH of D-mannose), 4.72 (d,  $J = 4.1$  Hz, 1H, C3'-OH of D-mannose), 4.64 (d,  $J = 5.5$  Hz, 1H, C2'-OH of D-mannose), 4.55 (dd,  $J = 11.6, 2.2$  Hz, 1H, C6'-Ha of D-mannose), 4.30 (dd,  $J = 11.6, 6.2$  Hz, 1H, C6'-Hb of D-mannose), 3.84 (ddd,  $J = 8.7, 6.2, 2.1$  Hz, 1H, C5'-H of D-mannose), 3.63 – 3.56 (m, 2H, C2'-H, C3'-H of D-mannose), 3.55 (dd,  $J = 9.4, 5.5$  Hz, 1H, C4'-H of D-mannose).  $^{13}\text{C}$  NMR (126 MHz, DMSO)  $\delta$  162.43 (C-11), 156.06 (C-2), 154.52 (C-9), 148.53 (C-4), 134.59 (C-7), 130.23 (C-5), 124.96 (C-6), 117.88 (C-10), 117.77 (C-8), 116.28 (C-3), 94.16 (C-1'), 71.36 (C-2'), 70.53 (C-3'), 70.34 (C-5'), 67.13 (C-4'), 65.16 (C-6'). HRMS:  $\text{C}_{16}\text{H}_{16}\text{O}_9\text{Na}$  for  $[\text{M}+\text{Na}]^+$ , calculated 375.0692, found 375.0693.

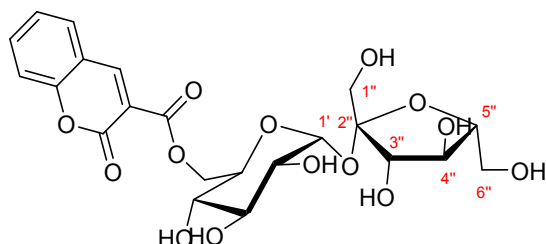

**6'-O-D-sucrosyl coumarin-3-carboxylate (5c):** syrup liquid;  $^1\text{H}$  NMR (500 MHz, DMSO- $d_6$ )  $\delta$  8.74 (s, 1H, H-4), 7.94 (dd,  $J = 7.8, 1.6$  Hz, 1H, H-1), 7.75 (ddd,  $J = 8.4, 7.3, 1.6$  Hz, 1H, H-7), 7.46-7.39 (m, 2H, H-8, H-6), 5.23 (d,  $J = 3.7$  Hz, 1H, C1'-H), 5.16 (d,  $J = 5.9$  Hz, 1H, C4'-OH), 5.12 (dd,  $J = 9.3, 6.0$  Hz, 2H, C3'-OH, C2'-OH), 4.93 (d,  $J = 4.8$  Hz, 1H, C3''-OH), 4.83 (t,  $J = 6.3$  Hz, 1H, C1''-OH), 4.66 (d,  $J = 7.9$  Hz, 1H, C4''-OH), 4.49 (dd,  $J = 11.8, 1.9$  Hz, 1H, C6'-Ha), 4.41 (dd,  $J = 6.0, 4.9$  Hz, 1H, C6''-OH), 4.27 (dd,  $J = 11.8, 6.0$  Hz, 1H, C6'-Hb), 4.11-4.06 (m, 1H, C5'-H), 3.91 (t,  $J = 8.1$  Hz, 1H, C3''-H), 3.79 (td,  $J = 8.0, 5.9$  Hz, 1H, C5''-H), 3.56 (tdd,  $J = 11.8, 9.2, 5.9$  Hz, 3H, C4''-H, C6''-Ha, C6''-Hb), 3.50-3.46 (m, 1H, C3'-H), 3.42 (d,  $J = 6.3$  Hz, 2H, C1''-Ha, C1''-Hb), 3.30-3.20 (m, 2H, C2'-H, C4'-H).  $^{13}\text{C}$  NMR (126 MHz, DMSO)  $\delta$  162.25 (C-11), 155.95 (C-2), 154.54 (C-9), 148.80 (C-4), 134.52 (C-7), 130.45 (C-5), 124.80 (C-6), 117.78 (C-10), 117.27 (C-8), 116.13 (C-3), 103.99 (C-2''), 91.63 (C-1'), 82.50 (C-5''), 76.89 (C-3''), 74.44 (C-4''), 72.68 (C-3''), 71.50 (C-2''), 70.17 (C-5'), 70.08 (C-4'), 65.03 (C-6'), 62.50 (C-1''), 62.16 (C-6''). HRMS:  $\text{C}_{22}\text{H}_{26}\text{O}_{14}\text{Na}$  for  $[\text{M}+\text{Na}]^+$ , calculated 537.1220, found 537.1218.

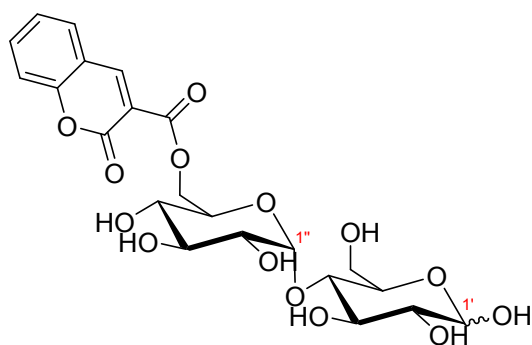

**6''-O-D-maltosyl coumarin-3-carboxylate (5d):** syrup liquid;  $^1\text{H}$  NMR (500 MHz, DMSO- $d_6$ )  $\delta$  8.77 (s, 0.5H,

H-4 of  $\beta$ -D-maltose), 8.75 (s, 0.5H, H-4 of  $\alpha$ -D-maltose), 7.94 (td,  $J = 8.2, 1.6$  Hz, 1H, H-5), 7.75 (ddd,  $J = 8.4, 7.3, 1.6$  Hz, 1H, H-7), 7.47-7.37 (m, 2H, H-8, H-6), 6.69 (d,  $J = 6.4$  Hz, 0.5H, C1'-OH of  $\beta$ -D-maltose), 6.36 (d,  $J = 3.9$  Hz, 0.5H, C1'-OH of  $\alpha$ -D-maltose), 5.56 (t,  $J = 6.2$  Hz, 1H, C2''-OH of D-maltose), 5.51 (d,  $J = 3.0$  Hz, 0.5H, C3'-OH of  $\beta$ -D-maltose), 5.35 (d,  $J = 3.1$  Hz, 0.5H, C3'-OH of  $\alpha$ -D-maltose), 5.28 (t,  $J = 5.8$  Hz, 1H, C4''-OH of D-maltose), 5.07 (d,  $J = 4.0$  Hz, 1.5H, C3''-OH of D-maltose), 5.04 (d,  $J = 3.7$  Hz, 0.5H, C1''-H of D-maltose), 4.98 (d,  $J = 4.9$  Hz, 0.5H, C1'-H of  $\alpha$ -D-maltose), 4.92 (t,  $J = 4.1$  Hz, 0.5H, C2'-OH of  $\beta$ -D-maltose), 4.63 (d,  $J = 6.8$  Hz, 0.5H, C2'-OH of  $\alpha$ -D-maltose), 4.57-4.52 (m, 1H, C6'-OH of D-maltose), 4.51 (t,  $J = 2.2$  Hz, 0.5H, C6''-Ha of  $\alpha$ -D-maltose), 4.45 (t,  $J = 6.0$  Hz, 0.5H, C6''-Hb of  $\beta$ -D-maltose), 4.33 (dd,  $J = 7.7, 6.4$  Hz, 0.5H, C1'-H of  $\beta$ -D-maltose), 4.25 (ddd,  $J = 11.7, 6.9, 2.6$  Hz, 1H, C6''-Hb of D-maltose), 3.88 (dtd,  $J = 8.7, 6.7, 1.9$  Hz, 1H, C6'-Ha of D-maltose), 3.72-3.65 (m, 1.5H, C5'-H, C6'-Hb of  $\alpha$ -D-maltose, C6'-Hb of  $\beta$ -D-maltose), 3.61 (dd,  $J = 6.3, 3.5$  Hz, 1H, C5''-H of D-maltose), 3.59-3.52 (m, 0.5H, C5'-H of  $\beta$ -D-maltose), 3.49-3.42 (m, 1.5H, C3'-H, C3''-H of  $\alpha$ -D-maltose, C3''-H of  $\beta$ -D-maltose), 3.36-3.28 (m, 2H, C2''-H, C4'-H of  $\alpha$ -D-maltose, C3'-H, C4'-H of  $\beta$ -D-maltose), 3.26-3.22 (m, 0.5H, C2'-H of  $\alpha$ -D-maltose), 3.22-3.15 (m, 1.5H, C4''-H of  $\alpha$ -D-maltose, C2''-H, C4''-H of  $\beta$ -D-maltose), 2.99-2.93 (m, 0.5H, C2'-H of  $\beta$ -D-maltose).  $^{13}\text{C}$  NMR (126 MHz, DMSO)  $\delta$  162.14 (C-11), 155.91, 155.90 (C-2), 154.59 (C-9), 148.83, 148.80 (C-4), 134.62 (C-7), 130.48, 130.42 (C-5), 124.88 (C-6), 117.80 (C-10), 117.16 (C-8), 116.17, 116.15 (C-3), 101.00 (C-1'' of  $\beta$ -D-maltose), 100.91 (C-1'' of  $\alpha$ -D-maltose), 96.81 (C-1' of  $\beta$ -D-maltose), 92.13 (C-1' of  $\alpha$ -D-maltose), 80.68 (C-4' of  $\alpha$ -D-maltose), 80.18 (C-4' of  $\beta$ -D-maltose), 76.56 (C-3' of  $\beta$ -D-maltose), 75.12 (C-5' of  $\beta$ -D-maltose), 74.31 (C-2' of  $\beta$ -D-maltose), 73.12 (C-3' of  $\alpha$ -D-maltose), 73.09 (C-3'' of  $\alpha$ -D-maltose), 72.98 (C-3'' of  $\beta$ -D-maltose), 72.47 (C-2'' of  $\beta$ -D-maltose), 72.34 (C-2'' of  $\alpha$ -D-maltose), 71.86 (C-5'' of  $\alpha$ -D-maltose), 70.62 (C-5'' of  $\beta$ -D-maltose), 70.59 (C-2' of  $\alpha$ -D-maltose), 70.35 (C-5' of  $\alpha$ -D-maltose), 70.22 (C-4'' of  $\alpha$ -D-maltose), 70.17 (C-4'' of  $\beta$ -D-maltose), 65.24 (C-6'' of D-maltose), 60.73 (C-6' of  $\beta$ -D-maltose), 60.61 (C-6' of  $\alpha$ -D-maltose). HRMS:  $\text{C}_{22}\text{H}_{26}\text{O}_{14}\text{Na}$  for  $[\text{M}+\text{Na}]^+$ , calculated 537.1220, found 537.1221.

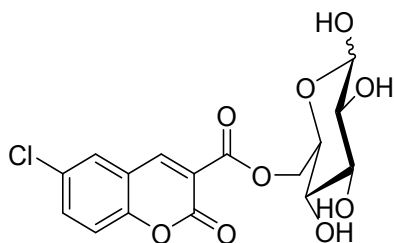

**6'-O-D-glucosyl 6-chlorocoumarin-3-carboxylate (5e)** : white solid, mp 208-209 °C;  $^1\text{H}$  NMR (500 MHz, DMSO- $d_6$ )  $\delta$  8.68 (s, 0.23H, H-4 of  $\beta$ -D-glucose), 8.66 (s, 0.77H, H-4 of  $\alpha$ -D-glucose), 8.06 (d,  $J = 2.6$  Hz, 1H, H-5), 7.77 (dd,  $J = 8.9, 2.6$  Hz, 1H, H-7), 7.49 (d,  $J = 8.8$  Hz, 1H, H-8), 6.71 (d,  $J = 6.6$  Hz, 0.23H, C1'-OH of  $\beta$ -D-glucose), 6.38 (d,  $J = 3.9$  Hz, 0.77H, C1'-OH of  $\alpha$ -D-glucose), 5.19 (d,  $J = 5.0$  Hz, 0.23H, C1'-H of  $\beta$ -D-glucose), 5.13 (d,  $J =$

5.7 Hz, 0.77H, C1'-H of  $\alpha$ -D-glucose), 5.00 (d,  $J = 4.3$  Hz, 0.23H, C4'-OH of  $\beta$ -D-glucose), 4.94 (dd,  $J = 9.6, 4.6$  Hz, 1H, C4'-OH of  $\alpha$ -D-glucose, C2'-OH of  $\beta$ -D-glucose), 4.81 (d,  $J = 4.7$  Hz, 0.77H, C2'-OH of  $\alpha$ -D-glucose), 4.58 (d,  $J = 6.7$  Hz, 0.77H, C3'-OH of  $\alpha$ -D-glucose), 4.53 (dd,  $J = 11.8, 1.9$  Hz, 0.23H, C6'-Ha of  $\beta$ -D-glucose), 4.49 (dd,  $J = 11.7, 2.1$  Hz, 0.77H, C6'-Ha of  $\alpha$ -D-glucose), 4.39 – 4.27 (m, 1.23H, C3'-OH of  $\beta$ -D-glucose, C6'-Hb of  $\beta$ -D-glucose), 3.91 (ddd,  $J = 10.0, 5.8, 2.0$  Hz, 0.77H, C5'-H of  $\alpha$ -D-glucose), 3.49 (td,  $J = 9.1, 4.6$  Hz, 1H, C5'-H of  $\beta$ -D-glucose, C3'-H of  $\alpha$ -D-glucose), 3.21 (ddt,  $J = 12.2, 9.2, 4.6$  Hz, 2H, C4'-H of  $\alpha$ -D-glucose, C3'-H of  $\beta$ -D-glucose, C2'-H of  $\beta$ -D-glucose), 2.96 (td,  $J = 8.2, 4.7$  Hz, 0.23H, C4'-H of  $\beta$ -D-glucose).  $^{13}\text{C}$  NMR (126 MHz, DMSO)  $\delta$  162.32, 162.28 (C-11), 155.53 (C-2), 153.18 (C-9), 147.43, 147.32 (C-4), 133.94, 133.91 (C-7), 129.12 (C-5), 128.52 (C-6), 119.12 (C-10), 118.81, 118.74 (C-8), 118.25 (C-3), 97.01 (C1' of  $\beta$ -D-glucose), 92.39 (C1' of  $\alpha$ -D-glucose), 76.45 (C3' of  $\beta$ -D-glucose), 74.68 (C2' of  $\beta$ -D-glucose), 73.48 (C5' of  $\beta$ -D-glucose), 72.90 (C3' of  $\alpha$ -D-glucose), 72.14 (C2' of  $\alpha$ -D-glucose), 70.50 (C4' of  $\alpha$ -D-glucose), 70.10 (C4' of  $\beta$ -D-glucose), 69.18 (C5' of  $\alpha$ -D-glucose), 65.36 (C6' of  $\beta$ -D-glucose), 65.32 (C6' of  $\alpha$ -D-glucose). HRMS:  $\text{C}_{16}\text{H}_{15}\text{ClO}_9\text{Na}$  for  $[\text{M}+\text{Na}]^+$ , calculated 409.0297, found 409.0302.

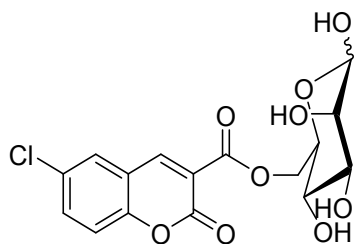

**6'-O-D-mannosyl 6-chlorocoumarin-3-carboxylate (5f)** : white solid, mp 188-190 °C;  $^1\text{H}$  NMR (500 MHz,  $\text{DMSO}-d_6$ )  $\delta$  8.69 (s, 1H, H-4), 8.01 (d,  $J = 2.6$  Hz, 1H, H-5), 7.77 (dd,  $J = 8.9, 2.6$  Hz, 1H, H-7), 7.49 (d,  $J = 8.8$  Hz, 1H, H-8), 6.40 (d,  $J = 4.4$  Hz, 1H, C1'-OH of D-mannose), 4.99 (d,  $J = 5.6$  Hz, 1H, C4'-OH of D-mannose), 4.90 (dd,  $J = 4.4, 1.4$  Hz, 1H, C1'-H of D-mannose), 4.73 (d,  $J = 4.0$  Hz, 1H, C3'-OH of D-mannose), 4.65 (d,  $J = 5.3$  Hz, 1H, C2'-OH of D-mannose), 4.58 (dd,  $J = 11.5, 2.1$  Hz, 1H, C6'-Ha of D-mannose), 4.31 (dd,  $J = 11.6, 6.0$  Hz, 1H, C6'-Hb of D-mannose), 3.85 (ddd,  $J = 8.4, 6.1, 2.1$  Hz, 1H, C5'-H of D-mannose), 3.63-3.58 (m, 2H, C2'-H, C3'-H of D-mannose), 3.58-3.53 (m, 1H, C4'-H of D-mannose).  $^{13}\text{C}$  NMR (126 MHz, DMSO)  $\delta$  162.19 (C-11), 155.59 (C-2), 153.12 (C-9), 147.20 (C-4), 133.89 (C-7), 128.97 (C-5), 128.57 (C-6), 119.11 (C-10), 119.04 (C-8), 118.29 (C-3), 94.13 (C-1'), 71.34 (C-2'), 70.52 (C-3'), 70.30 (C-5'), 67.07 (C-4'), 65.19 (C-6'). HRMS:  $\text{C}_{16}\text{H}_{15}\text{ClO}_9\text{Na}$  for  $[\text{M}+\text{Na}]^+$ , calculated 409.0302, found 409.0303.

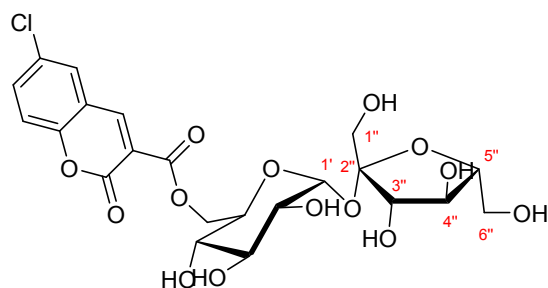

**6'-O-D-sucrosyl 6-chlorocoumarin-3-carboxylate (5g)** : syrup liquid;  $^1\text{H}$  NMR (500 MHz,  $\text{DMSO-}d_6$ )  $\delta$  8.70 (s, 1H, H-4), 8.07 (d,  $J = 2.6$  Hz, 1H, H-5), 7.77 (dd,  $J = 8.9, 2.6$  Hz, 1H, H-7), 7.48 (d,  $J = 8.8$  Hz, 1H, H-8), 5.21 (d,  $J = 3.7$  Hz, 1H, C1'-OH), 5.16 (d,  $J = 5.9$  Hz, 1H, C4'-OH), 5.12 (d,  $J = 5.6$  Hz, 1H, C3'-OH), 5.09 (d,  $J = 6.3$  Hz, 1H, C2'-OH), 4.93 (d,  $J = 4.8$  Hz, 1H, C3''-OH), 4.83 (t,  $J = 6.3$  Hz, 1H, C1''-OH), 4.68 (d,  $J = 7.8$  Hz, 1H, C4''-OH), 4.47 (dd,  $J = 11.8, 1.8$  Hz, 1H, C6'-Ha), 4.41 (dd,  $J = 6.0, 4.9$  Hz, 1H, C6''-OH), 4.27 (dd,  $J = 11.8, 6.1$  Hz, 1H, C6''-Hb), 4.07 (ddd,  $J = 10.1, 6.0, 1.9$  Hz, 1H, C5'-H), 3.90 (t,  $J = 8.1$  Hz, 1H, C3''-H), 3.78 (td,  $J = 8.0, 5.9$  Hz, 1H, C5''-H), 3.59 – 3.50 (m, 3H, C4''-H, C6''-Ha, C6''-Hb), 3.48 – 3.44 (m, 1H, C3''-H), 3.40 (d,  $J = 6.3$  Hz, 2H, C1''-Ha, C1''-Hb), 3.29 – 3.18 (m, 2H, C2''-H, C4''-H).  $^{13}\text{C}$  NMR (126 MHz,  $\text{DMSO}$ )  $\delta$  161.98 (C-11), 155.53 (C-2), 153.17 (C-9), 147.56 (C-4), 133.87 (C-7), 129.29 (C-5), 128.45 (C-6), 119.16 (C-10), 118.37 (C-8), 118.16 (C-3), 103.95 (C-2''), 91.53 (C-1'), 82.45 (C-5''), 76.78 (C-3''), 74.38 (C-4''), 72.69 (C-3'), 71.48 (C-2'), 70.13 (C-5'), 70.02 (C-4'), 65.16 (C-6'), 62.47 (C-1''), 62.17 (C-6''). HRMS:  $\text{C}_{22}\text{H}_{25}\text{ClO}_{14}\text{Na}$  for  $[\text{M}+\text{Na}]^+$ , calculated 571.0831, found 571.0830.

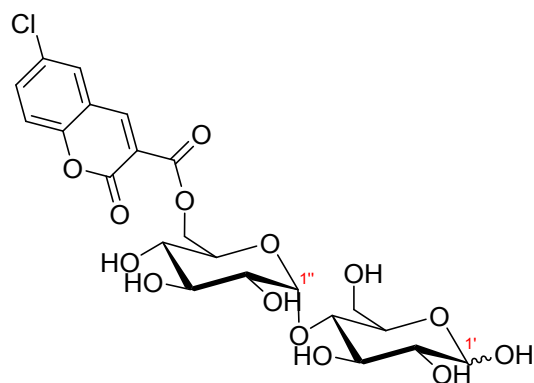

**6''-O-D-maltosyl 6-chlorocoumarin-3-carboxylate (5h)** : syrup liquid;  $^1\text{H}$  NMR (500 MHz,  $\text{DMSO-}d_6$ )  $\delta$  8.75 (s, 0.5H, H-4  $\beta$ -D-maltose), 8.71 (s, 0.5H, H-4 of  $\alpha$ -D-maltose), 8.05 (dd,  $J = 4.1, 2.6$  Hz, 1H, H-5), 7.81-7.74 (m, 1H, H-7), 7.49 (d,  $J = 8.9$  Hz, 1H, H-8), 6.68 (d,  $J = 6.2$  Hz, 0.5H, C1'-OH of  $\beta$ -D-maltose), 6.36 (d,  $J = 4.4$  Hz, 0.5H, C1'-OH of  $\alpha$ -D-maltose), 5.58 (d,  $J = 5.1$  Hz, 0.5H, C2''-OH of  $\beta$ -D-maltose), 5.51 (dd,  $J = 9.3, 4.0$  Hz, 1H, C2''-OH of  $\alpha$ -D-maltose, C3''-OH of  $\beta$ -D-maltose), 5.32 (d,  $J = 3.1$  Hz, 0.5H, C3'-OH of  $\alpha$ -D-maltose), 5.27 (t,  $J = 5.9$  Hz, 1H, C4'-OH of D-maltose), 5.05 (m, 2H, C3''-OH of D-maltose, C1''-H of D-maltose), 4.96 (d,  $J = 4.4$  Hz, 0.5H, C1'-H of  $\alpha$ -D-maltose), 4.92 (t,  $J = 4.0$  Hz, 0.5H, C2'-OH of  $\beta$ -D-maltose), 4.62 (d,  $J = 6.6$  Hz, 0.5H, C2'-OH of  $\alpha$ -

D-maltose), 4.57 (d,  $J = 6.1$  Hz, 0.5H, C6'-OH of  $\beta$ -D-maltose), 4.54-4.46 (m, 1.5H, C6''-Ha of D-maltose, , C6'-OH of  $\alpha$ -D-maltose), 4.33 (dd,  $J = 7.6, 6.2$  Hz, 0.5H, C1'-H of  $\beta$ -D-maltose), 4.27 (ddd,  $J = 11.5, 7.0, 4.2$  Hz, 1H, C6''-Hb of D-maltose), 3.87 (tdd,  $J = 9.0, 6.8, 2.0$  Hz, 1H, C6'-H of D-maltose), 3.72-3.65 (m, 1.5H, , C6'-Hb of D-maltose, , C5'-H of  $\alpha$ -D-maltose), 3.60 (dddd,  $J = 19.0, 13.6, 8.6, 5.0$  Hz, 1H,, C5''-H of D-maltose), 3.52 (td,  $J = 12.0, 11.4, 5.3$  Hz, 0.5H, C5'-H of  $\beta$ -D-maltose), 3.48-3.39 (m, 1.5H, C3''-H of D-maltose, , C3'-H of  $\alpha$ -D-maltose), 3.34-3.29 (m, 2H, , C4'-H of D-maltose, C2''-H of  $\alpha$ -D-maltose, C3'-H of  $\beta$ -D-maltose), 3.26-3.14 (m, 2H, C4''-H of D-maltose, C2'-H of  $\alpha$ -D-maltose, C2''-H of  $\beta$ -D-maltose), 2.96 (ddd,  $J = 9.2, 7.7, 4.8$  Hz, 0.5H, C2'-H of  $\beta$ -D-maltose).  $^{13}\text{C}$  NMR (126 MHz, DMSO)  $\delta$  161.92, 161.89 (C-11), 155.47 (C-2), 153.20 (C-9), 147.55, 147.43 (C-4), 133.95 (C-7), 129.15 (C-5), 128.53 (C-6), 119.16 (C-10), 118.33, 118.30 (C-8), 118.20 (C-3), 101.01 (C-1'' of  $\beta$ -D-maltose), 100.85 (C-1'' of  $\alpha$ -D-maltose), 96.79 (C-1' of  $\beta$ -D-maltose), 92.10 (C-1' of  $\alpha$ -D-maltose), 80.44 (C-4' of D-maltose), 76.54 (C-3' of  $\beta$ -D-maltose), 75.10 (C-5' of  $\beta$ -D-maltose), 74.25 (C-2' of  $\beta$ -D-maltose), 73.07 (C-3' of  $\alpha$ -D-maltose), 73.02 (C-3'' of  $\alpha$ -D-maltose), 72.40 (C-3'' of  $\beta$ -D-maltose), 72.30 (C-2'' of D-maltose), 71.86 (C-5'' of  $\alpha$ -D-maltose), 70.57 (C-5'' of  $\beta$ -D-maltose), 70.51 (C-2' of  $\alpha$ -D-maltose), 70.29 (C-5' of  $\alpha$ -D-maltose), 70.16 (C-4'' of  $\alpha$ -D-maltose), 70.07 (C-4'' of  $\beta$ -D-maltose), 65.31 (C-6'' of D-maltose), 60.73 (C-6' of  $\beta$ -D-maltose), 60.58 (C-6' of  $\alpha$ -D-maltose). HRMS:  $\text{C}_{22}\text{H}_{25}\text{ClO}_{14}\text{Na}$  for  $[\text{M}+\text{Na}]^+$ , calculated 571.0831, found 571.0833

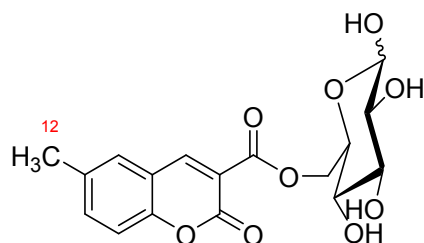

**6'-O-D-glucosyl 6-methylcoumarin-3-carboxylate (5i)** : white solid, mp 195-196 °C;  $^1\text{H}$  NMR (500 MHz, DMSO- $d_6$ )  $\delta$  8.60 (s, 0.75H, H-4 of  $\beta$ -D-glucose), 8.58 (s, 0.25H, , H-4 of  $\alpha$ -D-glucose), 7.66 (d,  $J = 2.2$  Hz, 1H, H-5), 7.55 (dd,  $J = 8.5, 2.1$  Hz, 1H, H-7), 7.32 (d,  $J = 8.5$  Hz, 1H, H-8), 6.74 (s, 0.75H, C1'-OH of  $\beta$ -D-glucose), 6.40 (s, 0.25H, C1'-OH of  $\alpha$ -D-glucose), 5.40-4.85 (m, 3H, C1'-H, C2'-OH, C3'-OH of D-glucose), 4.68 (d,  $J = 6.7$  Hz, 0.25H, C3'-OH of  $\alpha$ -D-glucose), 4.52 (dd,  $J = 11.7, 1.9$  Hz, 0.75H, C6'-Ha of  $\beta$ -D-glucose), 4.48 (dd,  $J = 11.7, 2.1$  Hz, 0.25H, C6'-Ha of  $\alpha$ -D-glucose), 4.36 (d,  $J = 7.7$  Hz, 0.75H, C3'-OH of  $\beta$ -D-glucose), 4.29 (td,  $J = 12.2, 6.1$  Hz, 1H, C6'-Hb of D-glucose), 3.92 (ddd,  $J = 10.1, 5.8, 2.1$  Hz, 0.25H, C5'-H of  $\alpha$ -D-glucose), 3.48 (ddd,  $J = 9.5, 6.1, 1.7$  Hz, 1H, C3'-H of  $\alpha$ -D-glucose, C5'-H of  $\beta$ -D-glucose), 3.22 (m, 2H, C2'-H of D-glucose, C4'-H of  $\alpha$ -D-glucose, C3'-H of  $\beta$ -D-glucose), 3.01 – 2.95 (m, 0.75H, C4'-H of  $\beta$ -D-glucose), 2.36 (s, 3H, H-12).  $^{13}\text{C}$  NMR (126 MHz, DMSO)  $\delta$  162.61, 162.57 (C-11), 156.12 (C-2), 152.74, 152.72 (C-9), 148.59, 148.48 (C-4), 135.57, 135.55 (C-6), 134.29 (C-7), 129.72 (C-5), 117.56 (C-10), 117.49, 117.45 (C-8), 116.02 (C-3), 97.06 (C1' of  $\beta$ -D-glucose), 92.44 (C1' of

$\alpha$ -D-glucose), 76.49 (C3' of  $\beta$ -D-glucose), 74.75 (C2' of  $\beta$ -D-glucose), 73.51 (C5' of  $\beta$ -D-glucose), 72.95 (C3' of  $\alpha$ -D-glucose), 72.21 (C2' of  $\alpha$ -D-glucose), 70.58 (C4' of  $\alpha$ -D-glucose), 70.18 (C4' of  $\beta$ -D-glucose), 69.22 (C5' of  $\alpha$ -D-glucose), 65.19 (C6'), 20.22 (C-12). HRMS:  $C_{17}H_{18}O_9Na$  for  $[M+Na]^+$ , calculated 389.0843, found 389.0851.

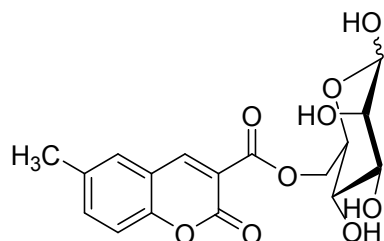

**6'-O-D-mannosyl 6-methylcoumarin-3-carboxylate (5j)** : white solid, mp 178-179 °C;  $^1H$  NMR (500 MHz, DMSO- $d_6$ )  $\delta$  8.64 (s, 1H, H-4), 7.64 (d,  $J = 2.1$  Hz, 1H, H-5), 7.55 (dd,  $J = 8.5, 2.1$  Hz, 1H, H-7), 7.32 (d,  $J = 8.4$  Hz, 1H, H-8), 6.43 (s, 1H, C1'-OH), 5.19-4.96 (m, 1H, C4'-OH), 4.91 (s, 1H, C1'-H), 4.77 (s, 1H, C3'-OH), 4.57 (dd,  $J = 11.5, 2.1$  Hz, 1H, C6'-Ha), 4.30 (dd,  $J = 11.6, 5.9$  Hz, 1H, C6'-Hb), 3.85 (ddd,  $J = 8.4, 5.9, 2.1$  Hz, 1H, C5'-H), 3.65-3.54 (m, 3H, C2'-H, C2'-OH, C3'-H), 3.54-3.46 (m, 1H, C4'-H), 2.37 (s, 3H, H-12).  $^{13}C$  NMR (126 MHz, DMSO)  $\delta$  162.49 (C-11), 156.20 (C-2), 152.66 (C-9), 148.44 (C-4), 135.51 (C-6), 134.31 (C-7), 129.65 (C-5), 117.74 (C-10), 117.47 (C-8), 116.04 (C-3), 94.20 (C-1'), 71.39 (C-2'), 70.57 (C-3'), 70.37 (C-5'), 67.11 (C-4'), 65.00 (C-6'), 20.19 (C-12). HRMS:  $C_{17}H_{18}O_9Na$  for  $[M+Na]^+$ , calculated 389.0843, found 389.0847.

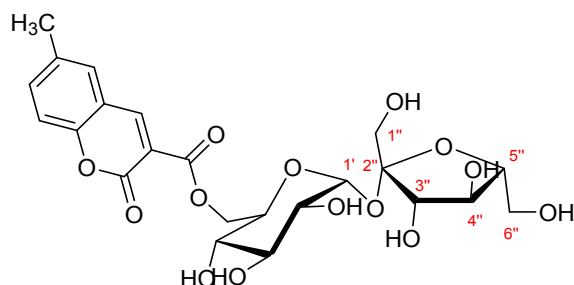

**6'-O-D-sucrosyl 6-methylcoumarin-3-carboxylate (5k)** : syrup liquid;  $^1H$  NMR (500 MHz, DMSO- $d_6$ )  $\delta$  8.66 (s, 1H, H-4), 7.72 (d,  $J = 2.1$  Hz, 1H, H-5), 7.56 (dd,  $J = 8.5, 2.1$  Hz, 1H, H-7), 7.34 (d,  $J = 8.4$  Hz, 1H, H-8), 5.23 (d,  $J = 3.7$  Hz, 1H, C1'-H), 5.19 (d,  $J = 6.0$  Hz, 1H, C4'-OH), 5.14 (dd,  $J = 10.0, 6.0$  Hz, 2H, C2'-OH, C3'-OH), 4.96 (d,  $J = 4.8$  Hz, 1H, C3''-OH), 4.86 (t,  $J = 6.3$  Hz, 1H, C1''-OH), 4.69 (d,  $J = 7.9$  Hz, 1H, C4''-OH), 4.49-4.44 (m, 1H, C6'-Ha), 4.42 (t,  $J = 5.5$  Hz, 1H, C6''-OH), 4.27 (dd,  $J = 11.8, 5.9$  Hz, 1H, C6'-Hb), 4.07 (ddd,  $J = 10.1, 5.8, 1.8$  Hz, 1H, C5'-H), 3.91 (t,  $J = 8.1$  Hz, 1H, C3''-H), 3.79 (td,  $J = 7.9, 5.8$  Hz, 1H, C5''-H), 3.62-3.51 (m, 3H, C4''-H, C6''-Ha, C6''-Hb), 3.49-3.45 (m, 1H, C3'-H), 3.45-3.42 (m, 2H, C1''-Ha, C1''-Hb), 3.31 – 3.21 (m, 2H, C2'-H, C4'-H), 2.37 (s, 3H, H-12).  $^{13}C$  NMR (126 MHz, DMSO)  $\delta$  162.35 (C-11), 156.17 (C-2), 152.76 (C-9), 148.77 (C-4), 135.52 (C-6), 134.19 (C-7), 129.97 (C-5), 117.53 (C-10), 117.19 (C-8), 115.95 (C-3), 104.04 (C-2''), 91.67 (C-1'), 82.55 (C-5''), 76.90 (C-3''), 74.44 (C-4''), 72.71 (C3'), 71.54 (C-2'), 70.17 (C-5'), 70.08 (C-4'), 65.00 (C-6'), 62.51, (C-1'')

62.18 (C-6''), 20.23 (C-12). HRMS: C<sub>23</sub>H<sub>28</sub>O<sub>14</sub>Na for [M+Na]<sup>+</sup>, calculated 551.1377, found 551.1377.

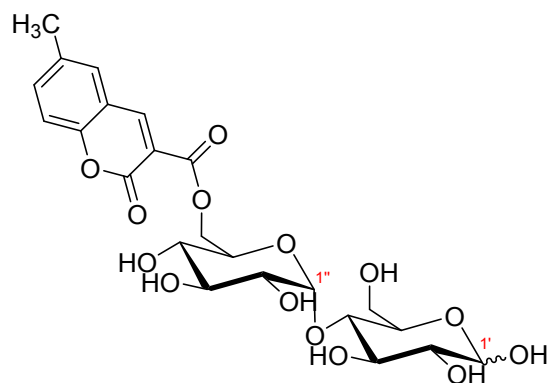

**6''-O-D-maltosyl 6-methylcoumarin-3-carboxylate (5I)** : syrup liquid; <sup>1</sup>H NMR (500 MHz, DMSO-*d*<sub>6</sub>) δ 8.69 (s, 0.5H, H-4 of β-D-maltose), 8.68 (s, 0.5H, H-4 of α-D-maltose), 7.71 (dd, *J* = 6.8, 2.0 Hz, 1H, H-5), 7.56 (dd, *J* = 8.5, 2.1 Hz, 1H, H-7), 7.33 (d, *J* = 8.5 Hz, 1H, H-8), 6.72 (d, *J* = 6.4 Hz, 0.5H, C1'-OH of β-D-maltose), 6.38 (d, *J* = 4.6 Hz, 0.5H, C1'-OH of α-D-maltose), 5.57 (dd, *J* = 6.2, 3.1 Hz, 1H, C2''-OH of D-maltose), 5.52 (d, *J* = 3.0 Hz, 0.5H, C3'-OH of β-D-maltose), 5.36 (d, *J* = 3.1 Hz, 0.5H, C3'-OH of α-D-maltose), 5.29 (t, *J* = 5.6 Hz, 1H, C4''-OH of D-maltose), 5.08 (t, *J* = 4.0 Hz, 1.5H, C3''-OH of D-maltose, C1''-H of β-D-maltose), 5.05 (d, *J* = 3.7 Hz, 0.5H, C1''-H of α-D-maltose), 5.00 (d, *J* = 4.9 Hz, 0.5H, C1'-H of α-D-maltose), 4.92 (t, *J* = 4.1 Hz, 0.5H, C2'-OH of β-D-maltose), 4.66 (d, *J* = 6.9 Hz, 0.5H, C2'-OH of α-D-maltose), 4.61 (t, *J* = 6.0 Hz, 0.5H, C6'-OH of β-D-maltose), 4.54-4.47 (m, 1.5H, C6''-Ha of D-maltose, C6'-OH of α-D-maltose), 4.34 (dd, *J* = 7.7, 6.4 Hz, 0.5H, C1'-H of β-D-maltose), 4.24 (ddd, *J* = 11.8, 7.0, 2.3 Hz, 1H, C6''-Hb of D-maltose), 3.87 (dtd, *J* = 9.1, 7.1, 1.9 Hz, 1H, C6'-Ha of D-maltose), 3.73-3.65 (m, 1.5H, C6''-Hb of D-maltose, C5'-H of α-D-maltose), 3.62 (d, *J* = 5.6 Hz, 1H, C5''-H of D-maltose), 3.55 (dt, *J* = 11.8, 6.0 Hz, 0.5H, C5'-H of β-D-maltose), 3.50-3.43 (m, 1.5H, C3''-H of D-maltose, C3'-H of α-D-maltose), 3.37-3.29 (m, 2H, C4'-H of D-maltose, C2''-H of α-D-maltose, C3'-H of β-D-maltose), 3.25-3.15 (m, 2H, C4''-H of D-maltose, C2'-H of α-D-maltose, C2''-H of β-D-maltose), 2.96 (ddd, *J* = 9.0, 7.7, 4.7 Hz, 0.5H, C2'-H of β-D-maltose), 2.38 (s, 3H, H-12). <sup>13</sup>C NMR (126 MHz, DMSO) δ 162.21 (C-11), 156.09, 156.07 (C-2), 152.76 (C-9), 148.73, 148.68 (C-4), 135.58 (C-6), 134.30, 134.26 (C-7), 129.88, 129.84 (C-5), 117.54 (C-10), 117.06 (C-8), 115.95 (C-3), 100.98 (C-1'' of β-D-maltose), 100.87 (C-1'' of α-D-maltose), 96.83 (C-1' of β-D-maltose), 92.16 (C-1' of α-D-maltose), 80.60 (C-4' of α-D-maltose), 80.07 (C-4' of β-D-maltose), 76.61 (C-3' of β-D-maltose), 75.16 (C-5' of β-D-maltose), 74.32 (C-2' of β-D-maltose), 73.11 (C-3' of α-D-maltose), 73.09 (C-3'' of α-D-maltose), 73.02 (C-3'' of β-D-maltose), 72.47 (C-2'' of β-D-maltose), 72.35 (C-2'' of α-D-maltose), 71.88 (C-5'' of α-D-maltose), 70.60 (C-5'' of β-D-maltose), 70.57 (C-2' of α-D-maltose), 70.38 (C-5' of α-D-maltose), 70.24 (C-4'' of α-D-maltose), 70.18 (C-4'' of β-D-maltose), 65.24 (C-6'' of β-D-maltose), 65.20 (C-6'' of α-D-maltose), 60.73 (C-6' of

$\beta$ -D-maltose), 60.61 (C-6' of  $\alpha$ -D-maltose), 20.22 (H-12). HRMS:  $C_{23}H_{28}O_{14}Na$  for  $[M+Na]^+$ , calculated 551.1377, found 551.1379.

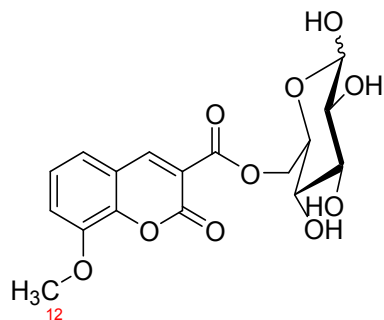

**6'-O-D-glucosyl 8-methoxycoumarin-3-carboxylate (5m)** : light yellow solid, mp 151-153 °C;  $^1H$  NMR (500 MHz,  $DMSO-d_6$ )  $\delta$  8.67 (s, 0.5H, H-4 of  $\beta$ -D-glucose), 8.65 (s, 0.5H, H-4 of  $\alpha$ -D-glucose), 7.45-7.39 (m, 2H, H-5, H-7), 7.33 (t,  $J = 7.9$  Hz, 1H, H-6), 6.72 (s, 0.5H, C1'-OH of  $\beta$ -D-glucose), 6.39 (s, 0.5H, C1'-OH of  $\alpha$ -D-glucose) 5.35-4.78 (m, 3H, C1'-H of D-glucose, C4'-OH of  $\alpha$ -D-glucose, C2'-OH of  $\beta$ -D-glucose), 4.70-4.47 (m, 1.5H, C3'-OH of  $\alpha$ -D-glucose, C6'-Ha of D-glucose), 4.36 (d,  $J = 7.7$  Hz, 0.5H, C3'-OH of  $\beta$ -D-glucose), 4.30 (td,  $J = 12.1, 6.2$  Hz, 1H, C6'-Hb of D-glucose), 3.92 (s, 3H, H-12), 3.91 (s, 0.5H, C5'-H of  $\alpha$ -D-glucose), 3.51-3.47 (m, 1H, C5'-H of  $\beta$ -D-glucose, C3'-H of  $\alpha$ -D-glucose), 3.24-3.18 (m, 2H, C2'-H of D-glucose, C3'-H of  $\beta$ -D-glucose, C4'-H of  $\alpha$ -D-glucose), 2.97 (t,  $J = 8.2$  Hz, 0.5H, C4'-H of  $\beta$ -D-glucose).  $^{13}C$  NMR (126 MHz,  $DMSO$ )  $\delta$  162.53, 162.49 (C-11), 155.67 (C-2), 148.93, 148.81 (C-8), 146.26 (C-9), 143.92 (C-4), 124.84 (C-6), 121.16 (C-5), 118.23 (C-3), 117.79, 117.72 (C-7), 116.51 (C-10), 97.02 (C1' of  $\beta$ -D-glucose), 92.41 (C1' of  $\alpha$ -D-glucose), 76.46 (C3' of  $\beta$ -D-glucose), 74.72 (C2' of  $\beta$ -D-glucose), 73.50 (C5' of  $\beta$ -D-glucose), 72.91 (C3' of  $\alpha$ -D-glucose), 72.18 (C2' of  $\alpha$ -D-glucose), 70.59 (C4' of  $\alpha$ -D-glucose), 70.19 (C4' of  $\beta$ -D-glucose), 69.21 (C5' of  $\alpha$ -D-glucose), 65.26 (C6' of D-glucose), 56.21, 56.17 (C-12). HRMS:  $C_{17}H_{18}O_{10}Na$  for  $[M+Na]^+$ , calculated 405.0798, found 405.0799.

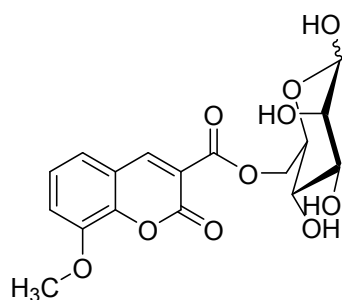

**6'-O-D-mannosyl 8-methoxycoumarin-3-carboxylate (5n)** : light yellow solid, mp 147-148 °C;  $^1H$  NMR (500 MHz,  $DMSO-d_6$ )  $\delta$  8.68 (s, 1H, H-4), 7.41 (ddd,  $J = 8.2, 4.1, 1.5$  Hz, 2H, H-5, H-7), 7.34 (t,  $J = 7.9$  Hz, 1H, H-6), 6.41 (s, 1H, C1'-OH), 5.17-4.94 (m, 1H, C4'-OH), 4.91 (m, 1H, C1'-H), 4.71 (s, 1H, C3'-OH), 4.56 (dd,  $J = 11.6, 2.1$  Hz, 1H, C6'-Ha), 4.31 (dd,  $J = 11.6, 6.2$  Hz, 1H, C6'-Hb), 3.92 (s, 3H, H-12), 3.86 (ddd,  $J = 9.5, 6.1, 2.1$  Hz, 1H,



C5'-H), 3.61 (d,  $J = 7.4$  Hz, 2H, C2'-OH, C3'-H), 3.56 (t,  $J = 9.3$  Hz, 1H, C2'-H), 3.48-3.39 (m, 1H, C4'-H).  $^{13}\text{C}$  NMR (126 MHz, DMSO)  $\delta$  162.36 (C-11), 155.71 (C-2), 148.69 (C-8), 146.27 (C-9), 143.84 (C-4), 124.83 (C-6), 121.07 (C-5), 118.22 (C-3), 117.94 (C-7), 116.47 (C-10), 94.16 (C-1'), 71.35 (C-2'), 70.52 (C-3'), 70.34 (C-5'), 67.14 (C-4'), 65.15 (C-6'), 56.19 (C-12). HRMS:  $\text{C}_{17}\text{H}_{18}\text{O}_{10}\text{Na}$  for  $[\text{M}+\text{Na}]^+$ , calculated 405.0798, found 405.0800.

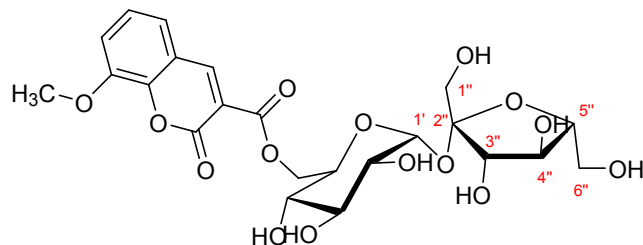

**6'-O-D-sucrosyl 8-methoxycoumarin-3-carboxylate (5o)** : syrup liquid;  $^1\text{H}$  NMR (500 MHz,  $\text{DMSO}-d_6$ )  $\delta$  8.71 (s, 1H, H-4), 7.51-7.41 (m, 2H, H-5, H-7), 7.38-7.30 (m, 1H, H-6), 5.23 (d,  $J = 3.7$  Hz, 1H, C1'-H), 5.14 (dt,  $J = 8.8, 6.1$  Hz, 3H, C2'-OH, C3'-OH, C4'-OH), 4.94 (d,  $J = 4.6$  Hz, 1H, C3''-OH), 4.83 (t,  $J = 6.4$  Hz, 1H, C1''-OH), 4.66 (d,  $J = 7.9$  Hz, 1H, C4''-OH), 4.48 (dd,  $J = 11.9, 2.0$  Hz, 1H, C6'-Ha), 4.40 (t,  $J = 4.9$  Hz, 1H, C6''-OH), 4.27 (dd,  $J = 11.8, 6.0$  Hz, 1H, C6'-Hb), 4.07 (ddd,  $J = 10.0, 6.0, 1.9$  Hz, 1H, C5'-H), 3.93 (s, 3H, H-12), 3.90 (t,  $J = 8.1$  Hz, 1H, C3''-H), 3.78 (td,  $J = 7.9, 5.6$  Hz, 1H, C5''-H), 3.61-3.50 (m, 3H, C4''-H, C6''-Ha, C6''-Hb), 3.50-3.45 (m, 1H, C3'-H), 3.42 (d,  $J = 6.1$  Hz, 2H, C1''-Ha, C1''-Hb), 3.30-3.20 (m, 2H, C2'-H, C4'-H).  $^{13}\text{C}$  NMR (126 MHz, DMSO)  $\delta$  162.26 (C-11), 155.69 (C-2), 149.05 (C-8), 146.22 (C-9), 143.93 (C-4), 124.73 (C-6), 121.37 (C-5), 118.31 (C-3), 117.42 (C-7), 116.49 (C-10), 103.99 (C-2''), 91.63 (C1'), 82.50 (C-5''), 76.86 (C-3''), 74.41 (C-4''), 72.66 (C-3'), 71.50 (C-2'), 70.17 (C-5'), 70.06 (C-4'), 65.05 (C-6'), 62.51 (C-1''), 62.14 (C-6''), 56.21 (C-12). HRMS:  $\text{C}_{23}\text{H}_{28}\text{O}_{15}\text{Na}$  for  $[\text{M}+\text{Na}]^+$ , calculated 567.1326, found 567.1327.

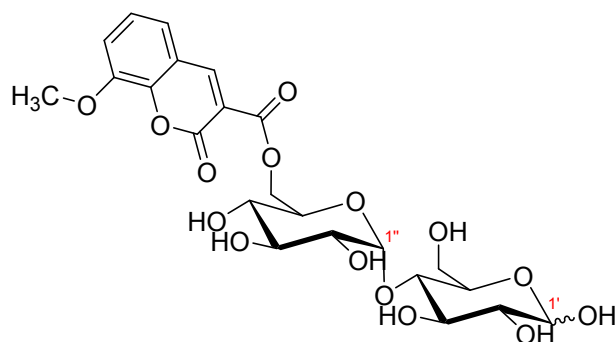

**6''-O-D-maltosyl 8-methoxycoumarin-3-carboxylate (5p)** : syrup liquid;  $^1\text{H}$  NMR (500 MHz,  $\text{DMSO}-d_6$ )  $\delta$  8.73 (s, 0.5H, H-4 of  $\beta$ -D-maltose), 8.72 (s, 0.5H, H-4 of  $\alpha$ -D-maltose), 7.53-7.37 (m, 2H, H-5, H-7), 7.37-7.29 (m, 1H, H-6), 6.69 (d,  $J = 5.4$  Hz, 0.5H, C1'-OH of  $\beta$ -D-maltose), 6.36 (d,  $J = 4.4$  Hz, 0.5H, C1'-OH of  $\alpha$ -D-maltose), 5.56 (d,  $J = 7.1$  Hz, 1H, C2''-OH of D-maltose), 5.52 (d,  $J = 3.0$  Hz, 0.5H, C3'-OH of  $\beta$ -D-maltose), 5.36 (d,  $J = 3.0$  Hz, 0.5H, C3'-OH of  $\alpha$ -D-maltose), 5.29 (s, 1H, C4''-OH of D-maltose), 5.09-5.05 (m, 1.5H, C3''-OH of D-maltose, C1''-

H of  $\beta$ -D-maltose), 5.04 (d,  $J = 3.7$  Hz, 0.5H, C1''-H of  $\alpha$ -D-maltose), 4.99 (s, 0.5H, C1'-H of  $\alpha$ -D-maltose), 4.91 (t,  $J = 4.0$  Hz, 0.5H, C2'-OH of  $\beta$ -D-maltose), 4.64 (d,  $J = 6.7$  Hz, 0.5H, C2'-OH of  $\alpha$ -D-maltose), 4.55-4.52 (m, 1H, C6''-Ha of D-maltose), 4.51 (t,  $J = 2.1$  Hz, 0.5H, C6'-OH of  $\beta$ -D-maltose), 4.44 (d,  $J = 6.9$  Hz, 0.5H, C6'-OH of  $\alpha$ -D-maltose), 4.35-4.30 (m, 0.5H, C1'-H of  $\beta$ -D-maltose), 4.25 (ddd,  $J = 11.8, 7.0, 2.7$  Hz, 1H, C6''-Hb of D-maltose), 3.92 (s, 3H, H-12), 3.91-3.84 (m, 1H, C6'-Ha of D-maltose), 3.73-3.64 (m, 1.5H, C6'-Hb of D-maltose, C5'-H of  $\alpha$ -D-maltose), 3.60 (dd,  $J = 6.0, 3.4$  Hz, 1H, C5''-H of D-maltose), 3.55 (dt,  $J = 11.6, 5.8$  Hz, 0.5H, C5'-H of D-maltose), 3.49-3.43 (m, 1.5H, C3''-H of D-maltose, C3'-H of  $\alpha$ -D-maltose), 3.36-3.28 (m, 2H, C4'-H of D-maltose, C2''-H of  $\alpha$ -D-maltose, C3'-H of  $\beta$ -D-maltose), 3.27-3.13 (m, 2H, C4''-H of D-maltose, C2'-H of  $\alpha$ -D-maltose, C2''-H of  $\beta$ -D-maltose), 2.99-2.93 (m, 0.5H, C2'-H of  $\beta$ -D-maltose).  $^{13}\text{C}$  NMR (126 MHz, DMSO)  $\delta$  162.16 (C-11), 155.64 (C-2), 149.09, 149.05 (C-8), 146.25 (C-9), 143.96 (C-4), 124.82 (C-6), 121.37, 121.32 (C-5), 118.32 (C-3), 117.30 (C-7), 116.57 (C-10), 101.01 (C-1'' of  $\beta$ -D-maltose), 100.94 (C-1'' of  $\alpha$ -D-maltose), 96.82 (C-1' of  $\beta$ -D-maltose), 92.15 (C-1' of  $\alpha$ -D-maltose), 80.67 (C-4' of  $\alpha$ -D-maltose), 80.21 (C-4' of  $\beta$ -D-maltose), 76.57 (C-3' of  $\beta$ -D-maltose), 75.13 (C-5' of  $\beta$ -D-maltose), 74.30 (C-2' of  $\beta$ -D-maltose), 73.13 (C-3' of  $\alpha$ -D-maltose), 73.10 (C-3'' of  $\alpha$ -D-maltose), 72.99 (C-3'' of  $\beta$ -D-maltose), 72.48 (C-2'' of  $\beta$ -D-maltose), 72.36 (C-2'' of  $\alpha$ -D-maltose), 71.87 (C-5'' of  $\alpha$ -D-maltose), 70.63 (C-5'' of  $\beta$ -D-maltose), 70.60 (C-2' of  $\alpha$ -D-maltose), 70.36 (C-5' of  $\alpha$ -D-maltose), 70.22 (C-4'' of  $\alpha$ -D-maltose), 70.17 (C-4'' of  $\beta$ -D-maltose), 65.27 (C-6'' of D-maltose), 60.72 (C-6' of  $\beta$ -D-maltose), 60.59 (C-6' of  $\alpha$ -D-maltose), 56.24 (C-12). HRMS:  $\text{C}_{23}\text{H}_{28}\text{O}_{15}\text{Na}$  for  $[\text{M}+\text{Na}]^+$ , calculated 567.1320, found 567.1318.

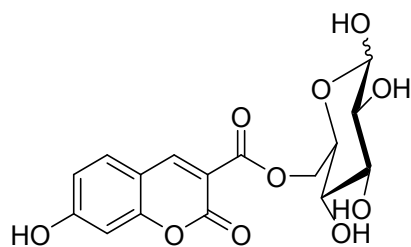

**6'-O-D-glucosyl 7-hydroxycoumarin-3-carboxylate (5q)**: light yellow solid, mp 201-203 °C;  $^1\text{H}$  NMR (500 MHz, DMSO- $d_6$ )  $\delta$  8.64 (s, 0.5H, H-4 of  $\beta$ -D-glucose), 8.62 (s, H-4 of  $\alpha$ -D-glucose), 7.76 (d,  $J = 8.6$  Hz, 1H, H-5), 6.85 (dd,  $J = 8.6, 2.3$  Hz, 1H, H-6), 6.74 (d,  $J = 2.2$  Hz, 1H, H-8), 6.69 (s, 0.5H, C1'-OH of  $\beta$ -D-glucose), 6.36 (s, 0.5H, C1'-OH of  $\alpha$ -D-glucose), 5.16 (s, 0.5H, C1'-H of  $\beta$ -D-glucose), 5.11 (s, 0.5H, C1'-H of  $\alpha$ -D-glucose), 4.98 (s, 0.5H, C4'-OH of  $\beta$ -D-glucose), 4.93 (d,  $J = 3.6$  Hz, 1H, C2'-OH of  $\beta$ -D-glucose, C4'-OH of  $\alpha$ -D-glucose), 4.79 (s, 0.5H, C2'-OH of  $\alpha$ -D-glucose), 4.56 (s, 0.5H, C3'-OH of  $\alpha$ -D-glucose), 4.51-4.42 (m, 1H, C6'-Ha of D-glucose), 4.34 (d,  $J = 7.8$  Hz, 1H, C3'-OH of  $\beta$ -D-glucose), 4.26 (ddd,  $J = 13.6, 11.7, 6.2$  Hz, 1H, C6'-Hb of D-glucose), 3.89 (ddd,  $J = 10.1, 6.0, 2.1$  Hz, 0.5H, C5'-H of  $\alpha$ -D-glucose), 3.48-3.45 (m, 1H, C5'-H of  $\beta$ -D-glucose, C3'-H of  $\alpha$ -D-glucose), 3.21-3.16 (m, 2H, C2'-H of D-glucose, C3'-H of  $\beta$ -D-glucose, C4'-H of  $\alpha$ -D-glucose), 2.95 (t,  $J = 8.1$  Hz, 0.5H,

C4'-H of  $\beta$ -D-glucose).  $^{13}\text{C}$  NMR (126 MHz, DMSO)  $\delta$  164.31, 164.28 (C-11), 162.88, 162.83 (C-7), 157.18, 157.15 (C-2), 156.39 (C-9), 149.40, 149.29 (C-4), 132.11 (C-5), 114.14, 114.12 (C-10), 111.99, 111.91 (C-3), 110.30 (C-6), 101.88 (C-8), 96.98 (C1' of  $\beta$ -D-glucose), 92.36 (C1' of  $\alpha$ -D-glucose), 76.47 (C3' of  $\beta$ -D-glucose), 74.71 (C2' of  $\beta$ -D-glucose), 73.55 (C5' of  $\beta$ -D-glucose), 72.91 (C3' of  $\alpha$ -D-glucose), 72.17 (C2' of  $\alpha$ -D-glucose), 70.61 (C4' of  $\alpha$ -D-glucose), 70.22 (C4' of  $\beta$ -D-glucose), 69.24 (C5' of  $\alpha$ -D-glucose), 64.82 (C-6'). HRMS:  $\text{C}_{16}\text{H}_{16}\text{O}_{10}\text{Na}$  for  $[\text{M}+\text{Na}]^+$ , calculated 391.066, found 391.0652.

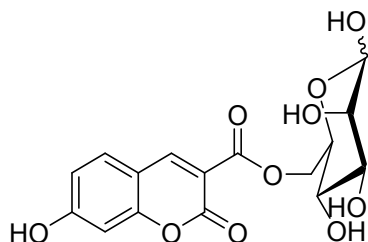

**6'-O-D-mannosyl 7-hydroxycoumarin-3-carboxylate (5r)** : light yellow solid, mp 175-176 °C;  $^1\text{H}$  NMR (500 MHz, DMSO- $d_6$ )  $\delta$  8.65 (s, 1H, H-4), 7.72 (d,  $J$  = 8.5 Hz, 1H, H-5), 6.86 (dd,  $J$  = 8.6, 2.2 Hz, 1H, H-6), 6.75 (d,  $J$  = 2.2 Hz, 1H, H-8), 6.38 (s, 1H, C1'-OH), 5.05-4.92 (m, 1H, C4'-OH), 4.89 (s, 1H, C1'-H), 4.70-4.60 (m, 1H, C3'-OH), 4.51 (dd,  $J$  = 11.6, 2.2 Hz, 1H, C6'-Ha), 4.27 (dd,  $J$  = 11.4, 6.3 Hz, 1H, C6'-Hb), 3.83 (ddd,  $J$  = 8.8, 6.3, 2.1 Hz, 1H, C5'-H), 3.62-3.56 (m, 2H, C2'-OH, C3'-H), 3.53 (t,  $J$  = 9.6 Hz, 2H, C2'-H, C4'-H).  $^{13}\text{C}$  NMR (126 MHz, DMSO)  $\delta$  164.20 (C-11), 162.71 (C-7), 157.08 (C-2), 156.44 (C-9), 149.24 (C-4), 132.01 (C-5), 114.11 (C-10), 112.17 (C-3), 110.29 (C-6), 101.90 (C-8), 94.11 (C-1'), 71.34 (C-2'), 70.54 (C-3'), 70.35 (C-5'), 67.19 (C-4'), 64.81 (C-6'). HRMS:  $\text{C}_{16}\text{H}_{16}\text{O}_{10}\text{Na}$  for  $[\text{M}+\text{Na}]^+$ , calculated 391.066, found 391.0653.

3a

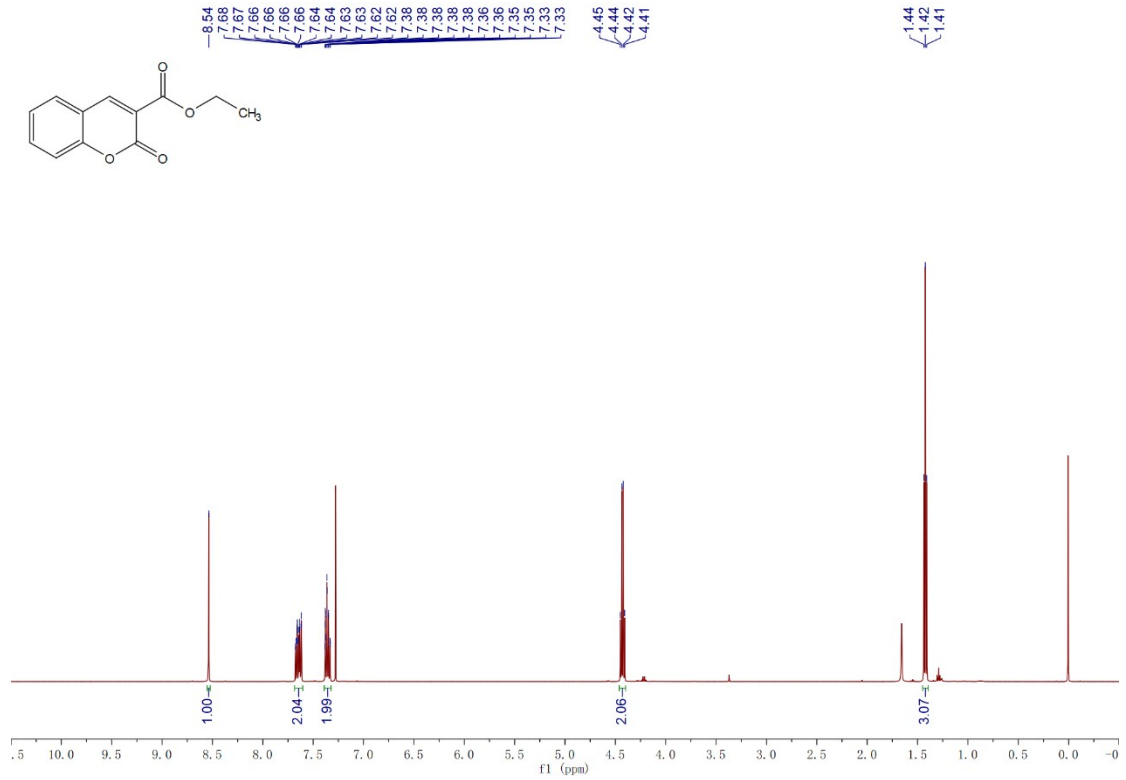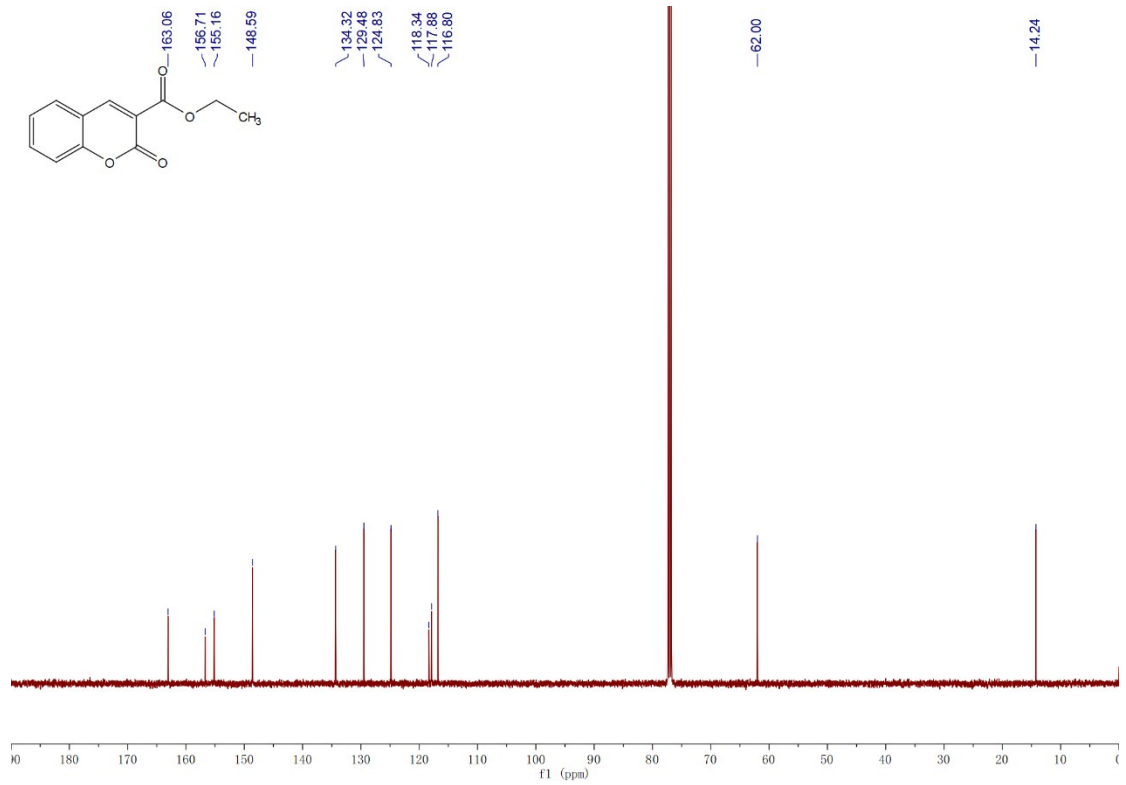

3b

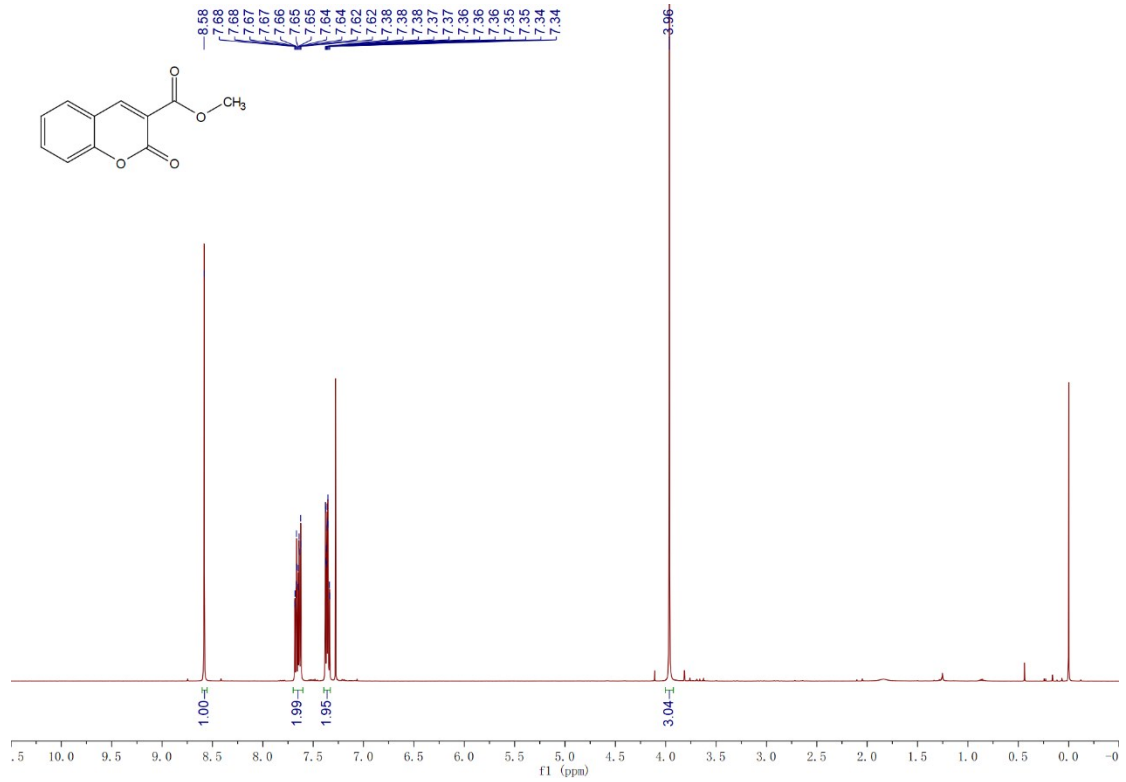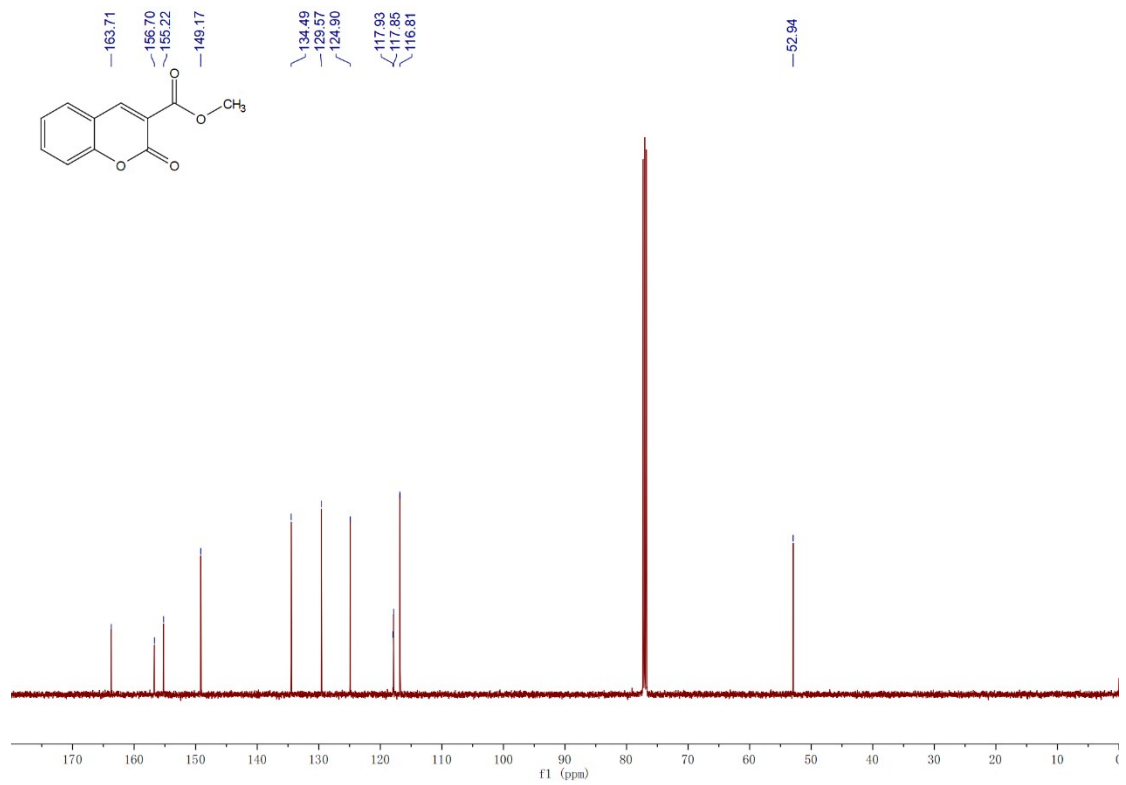

3c

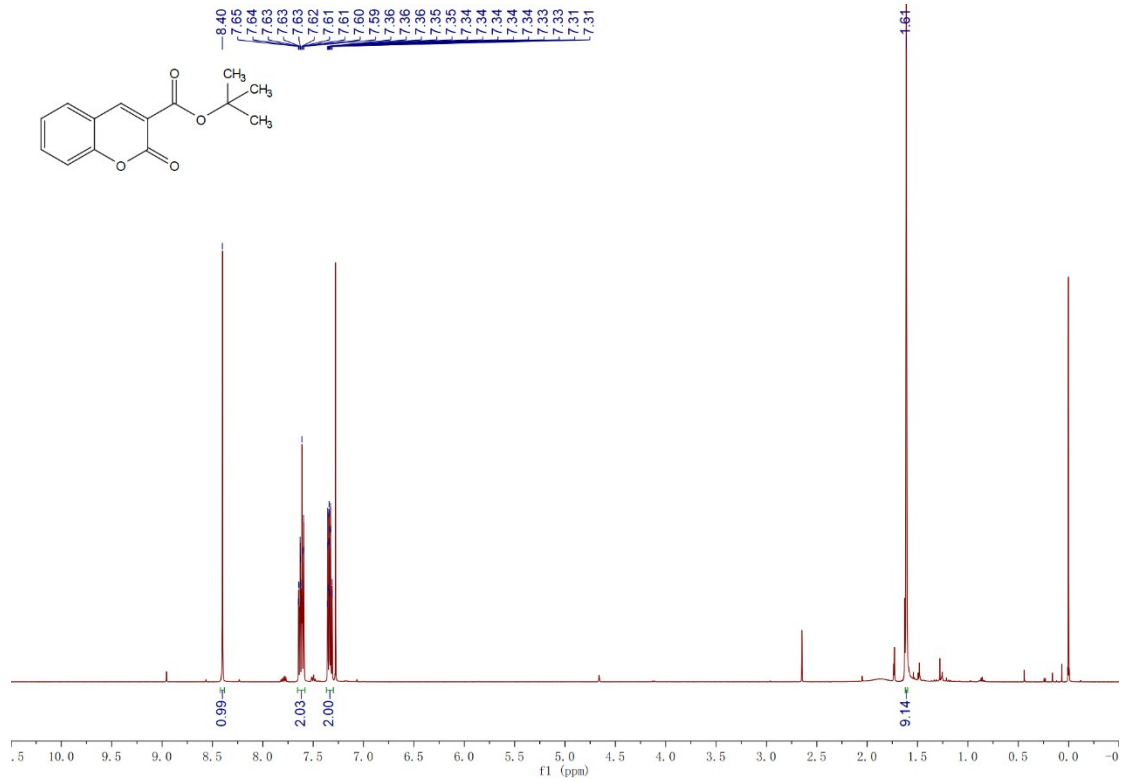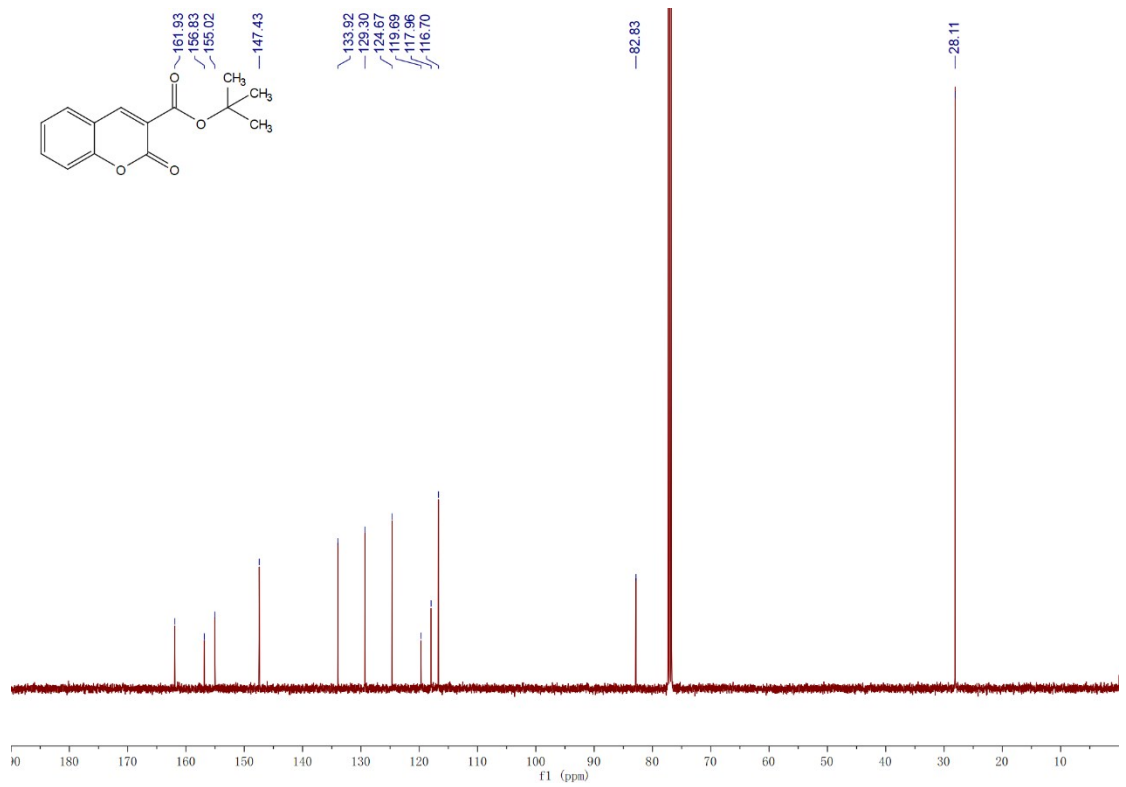

3d

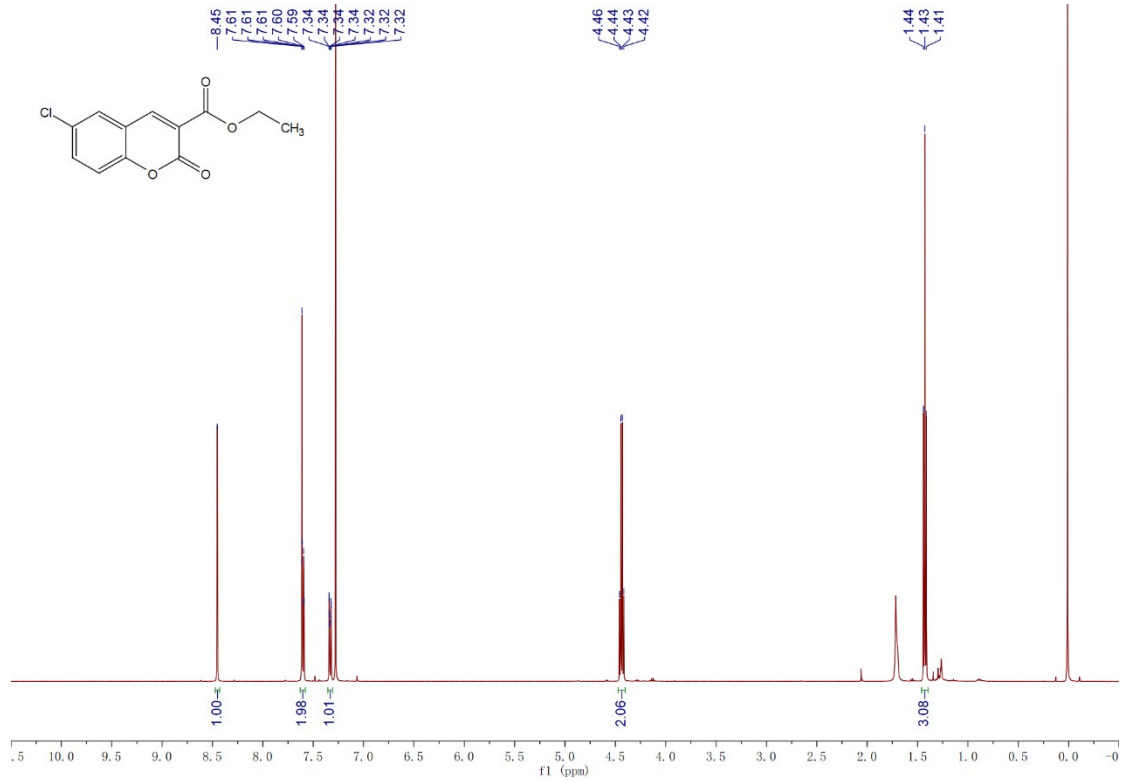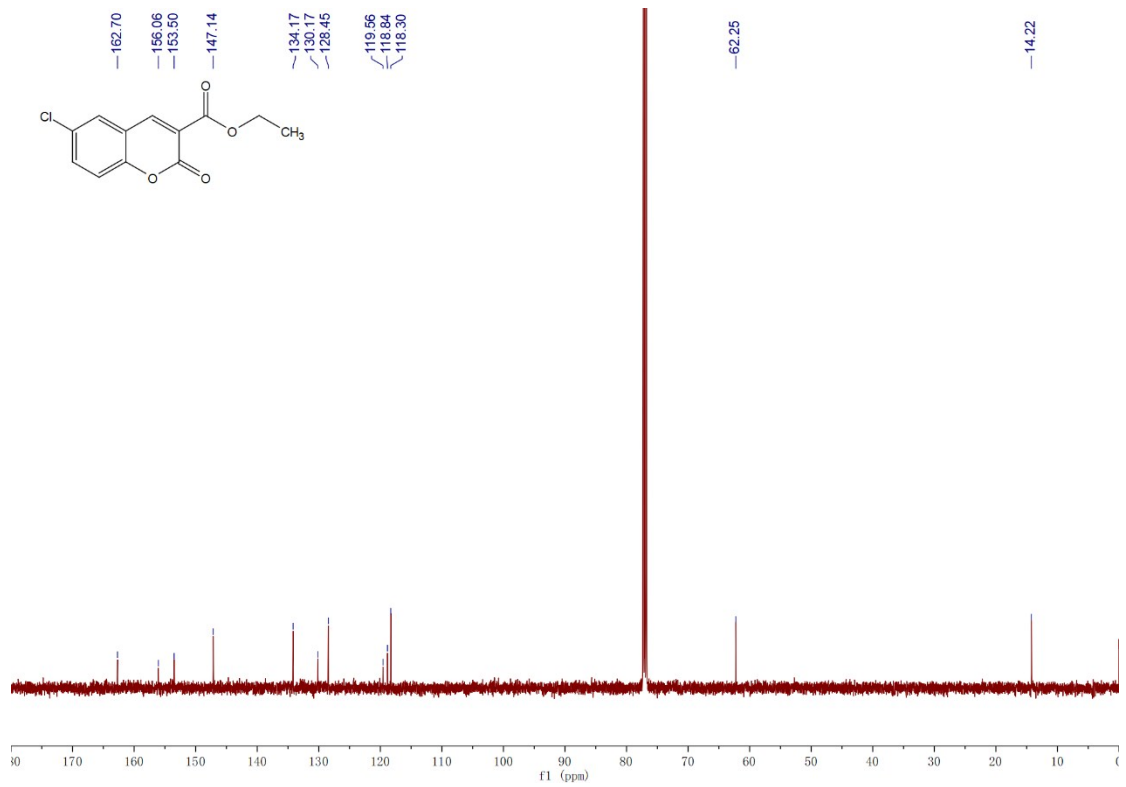

3e

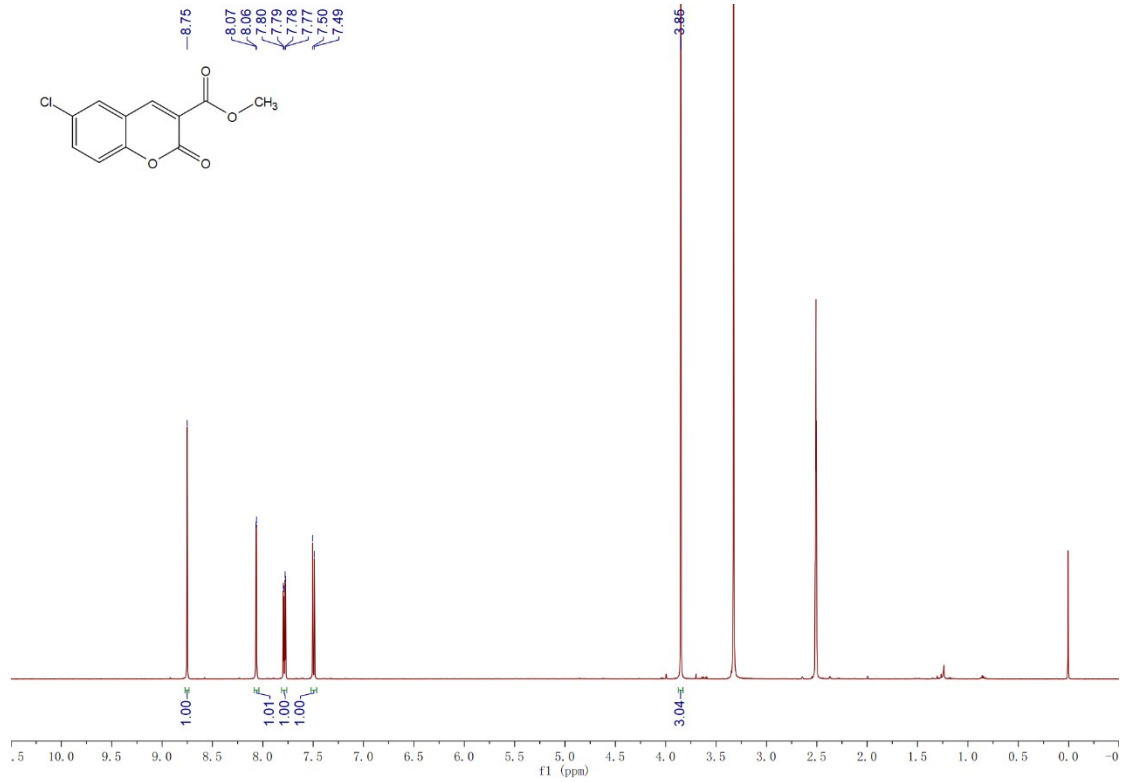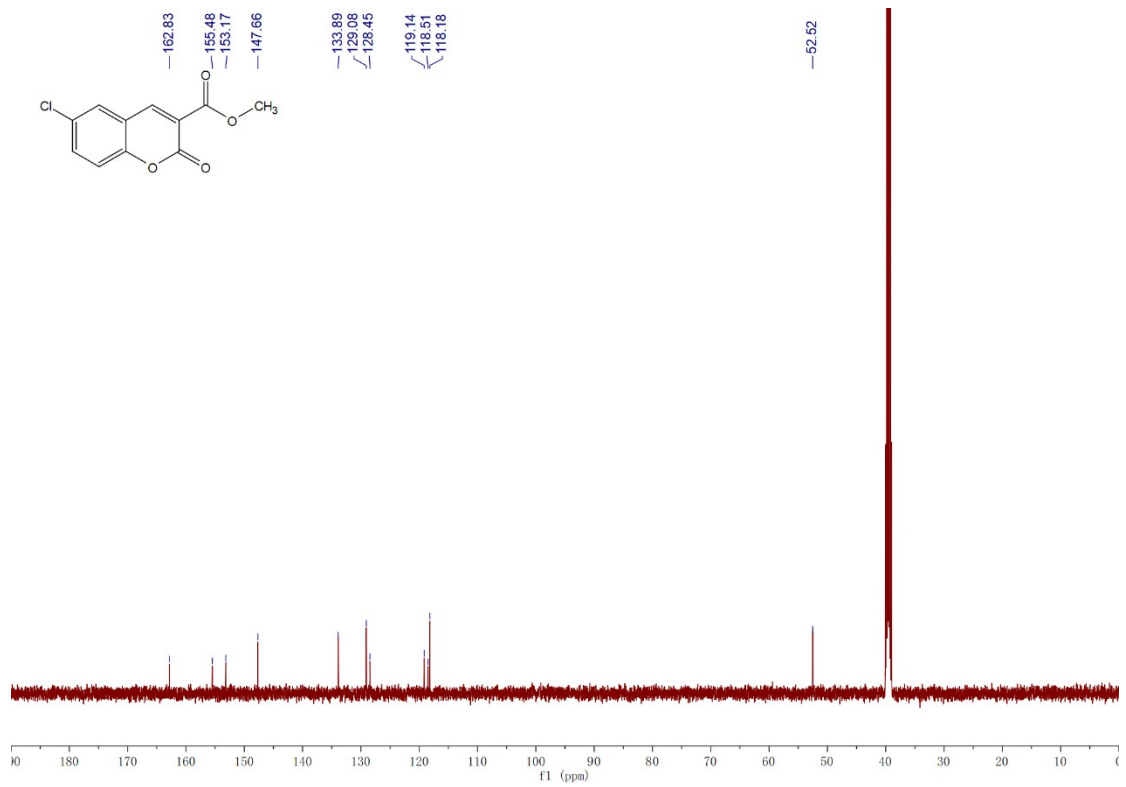



3h

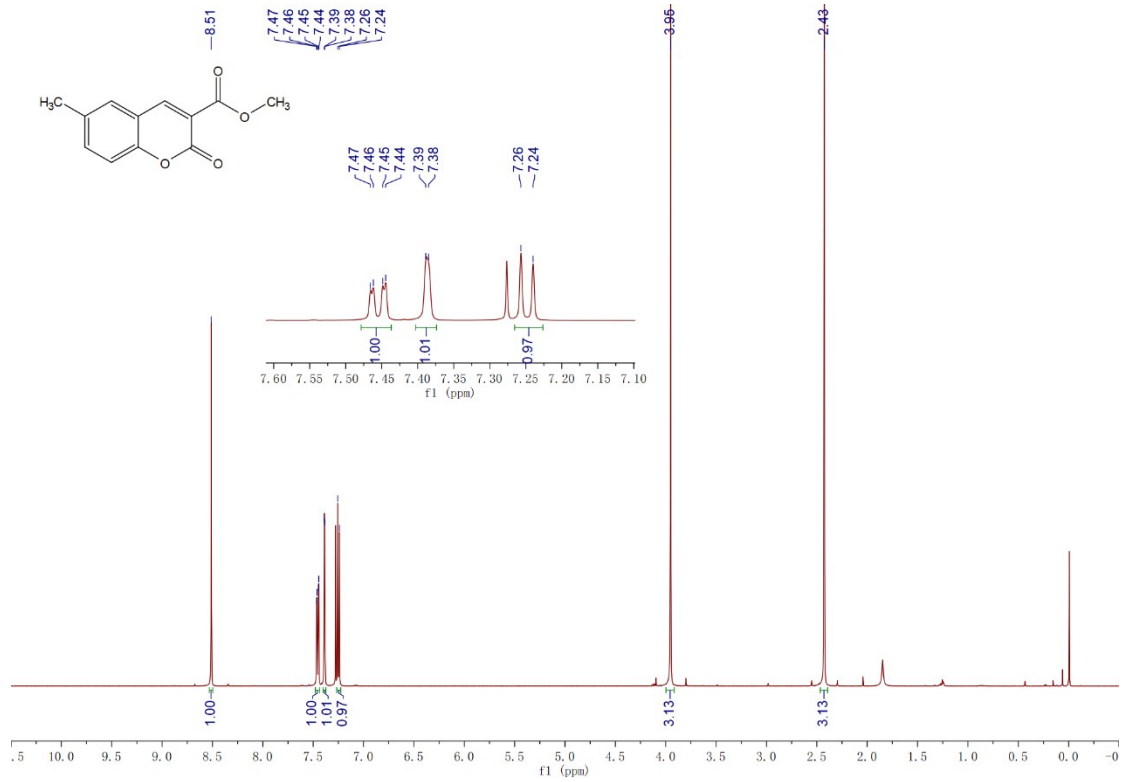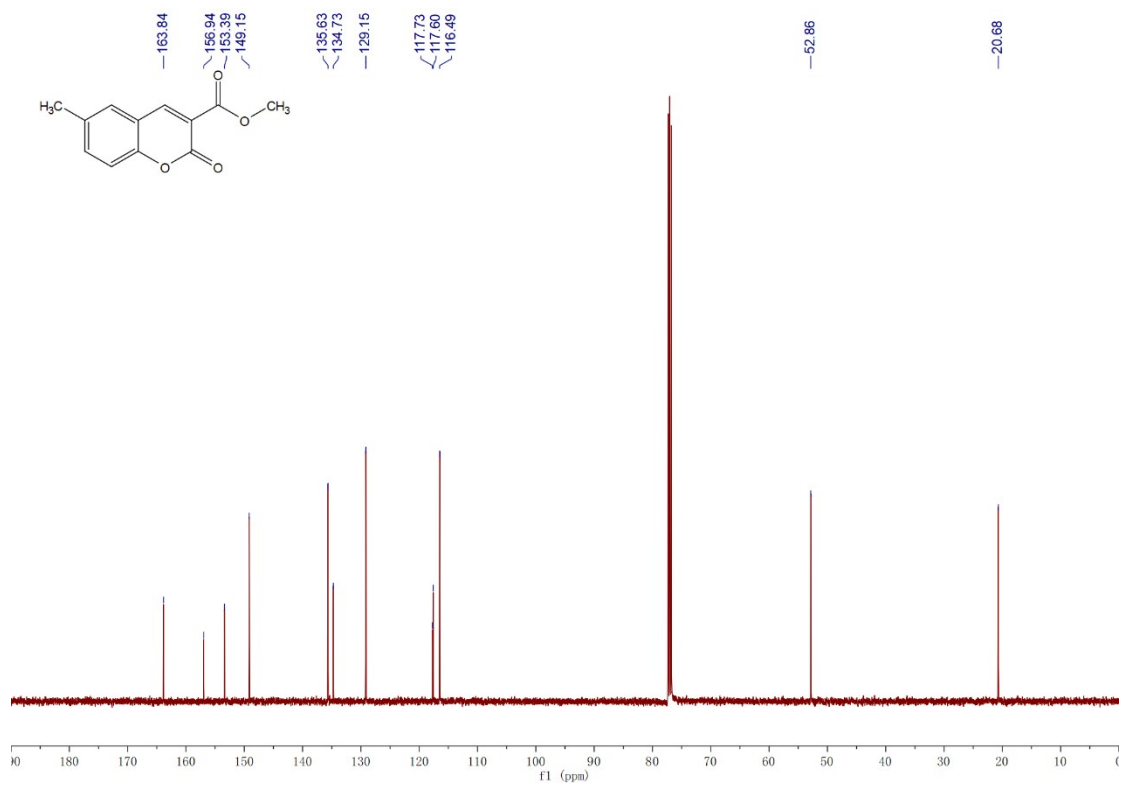

3j

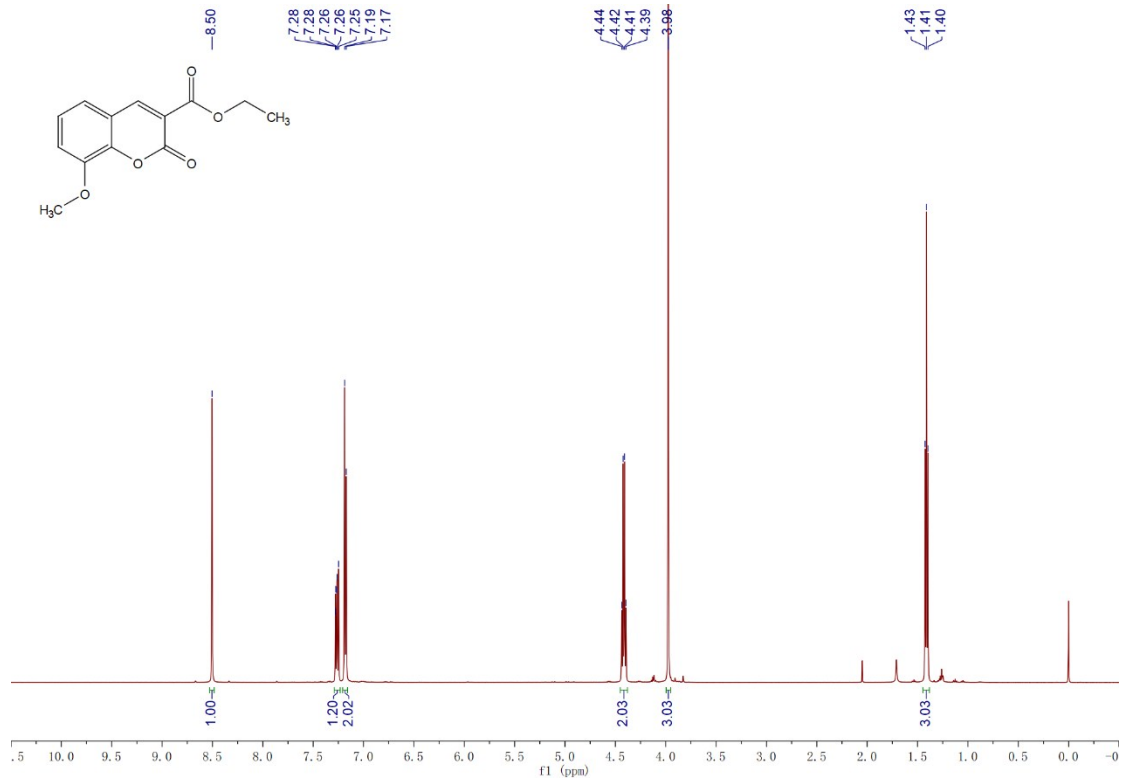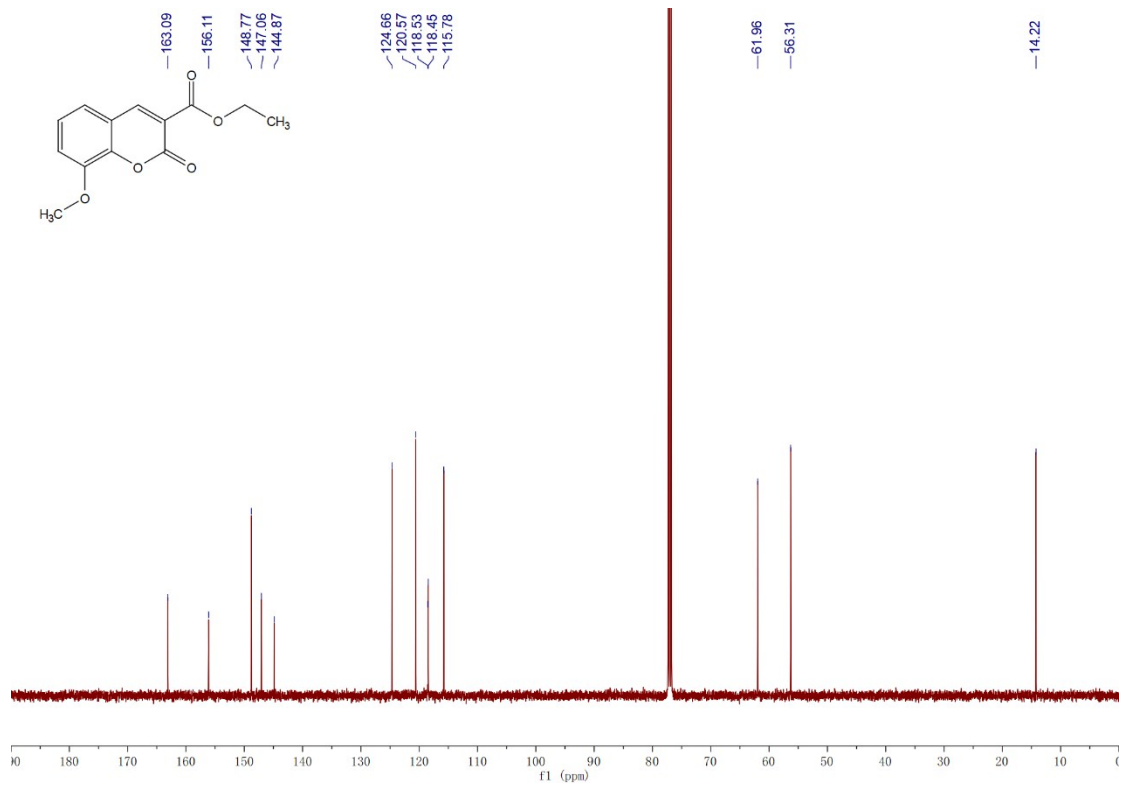

3k

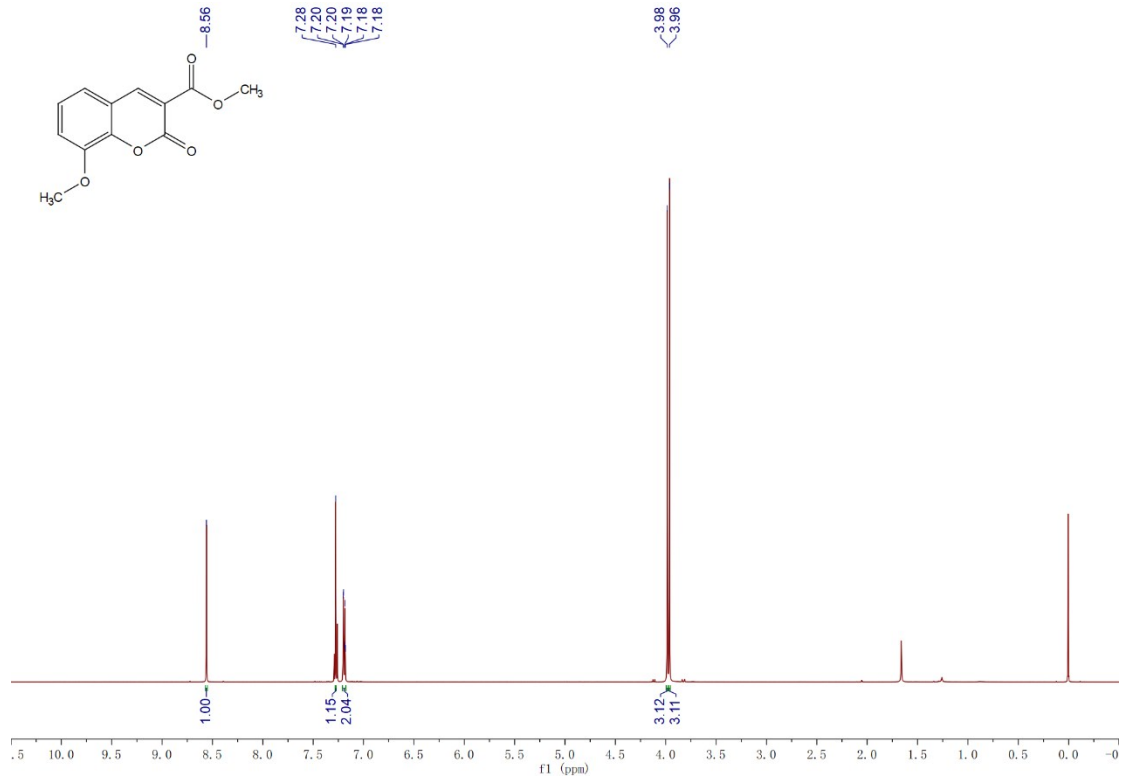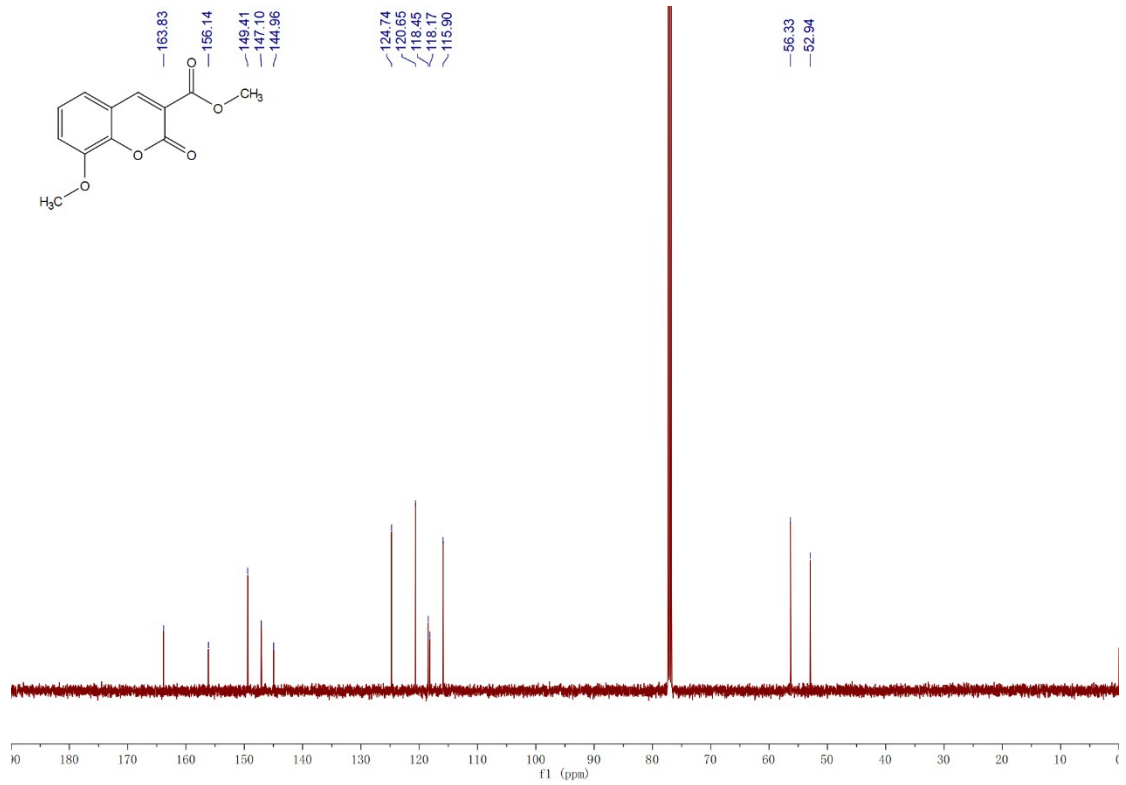

3n

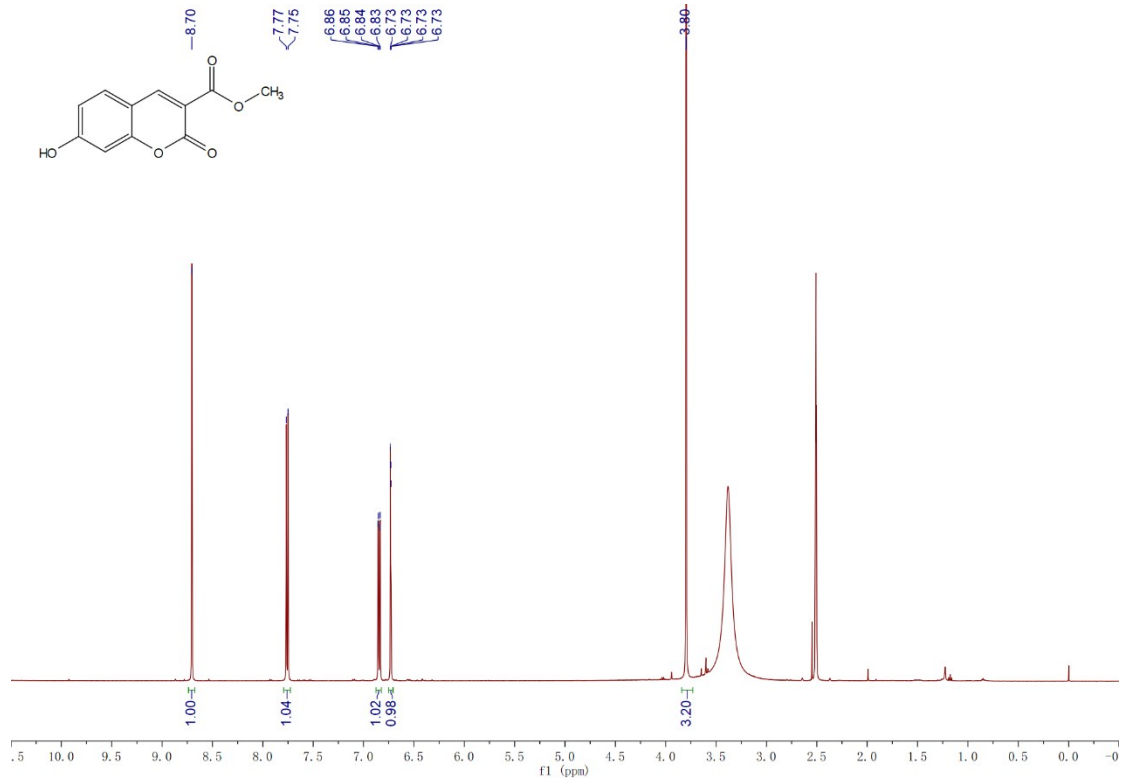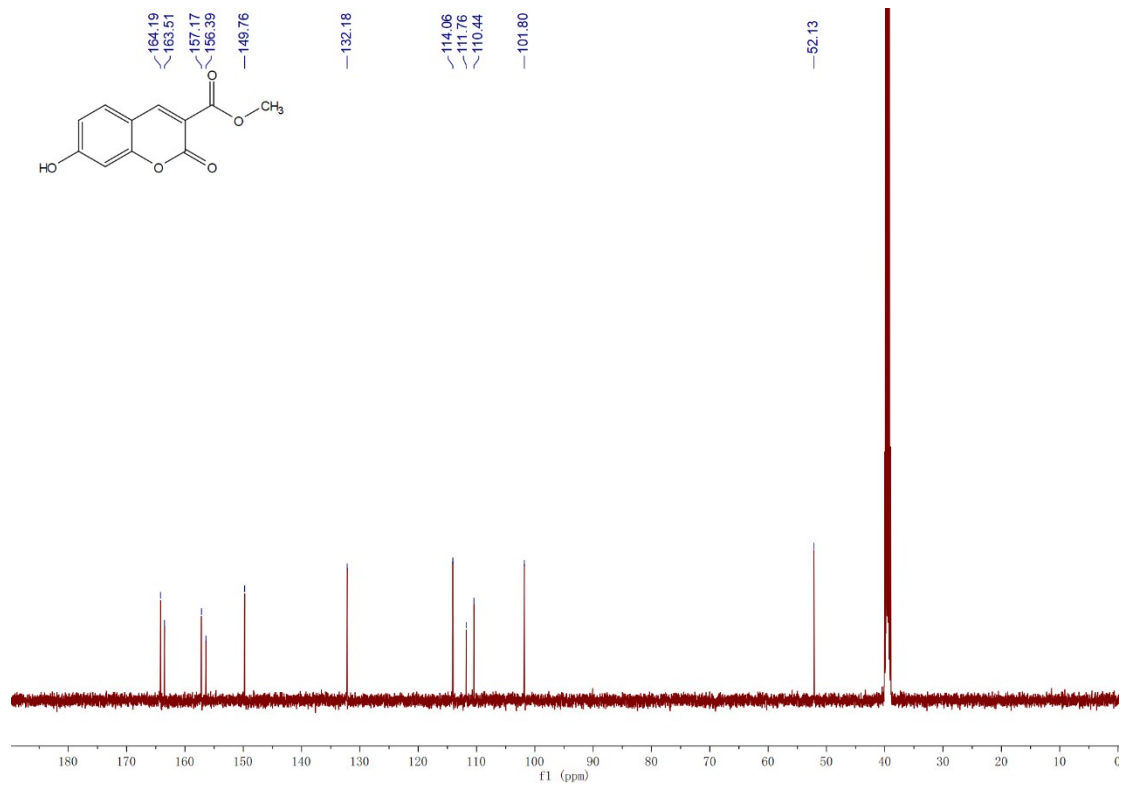

5a

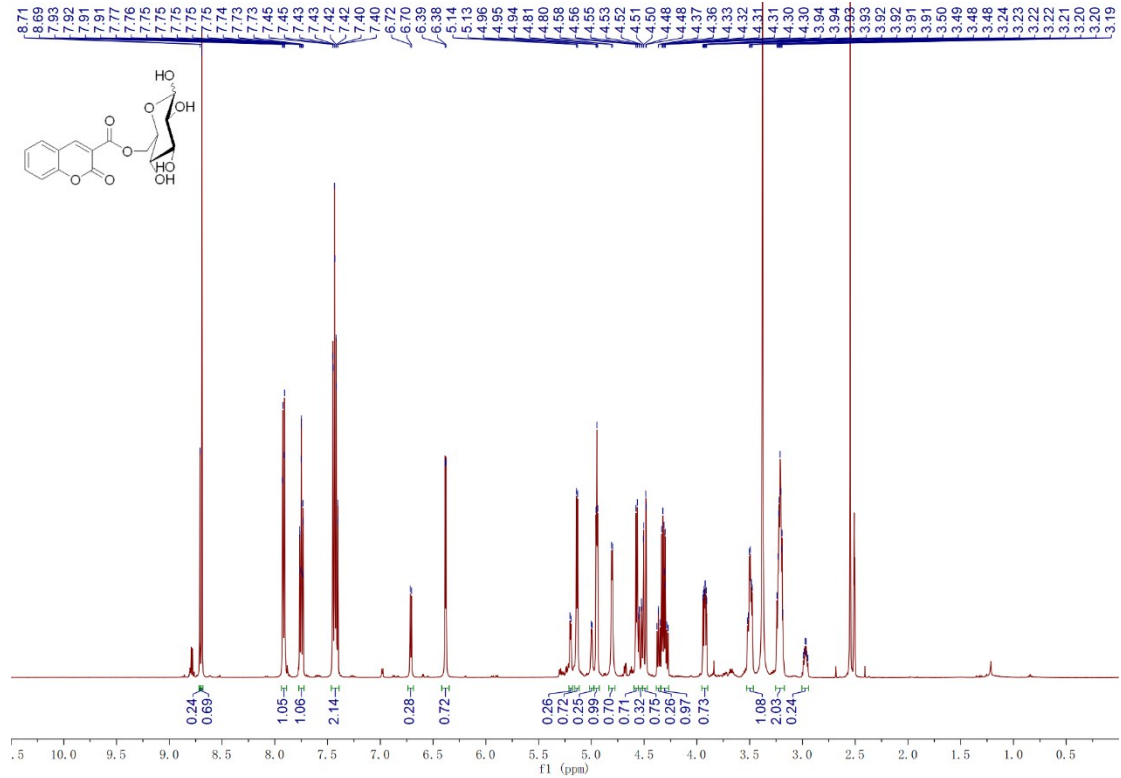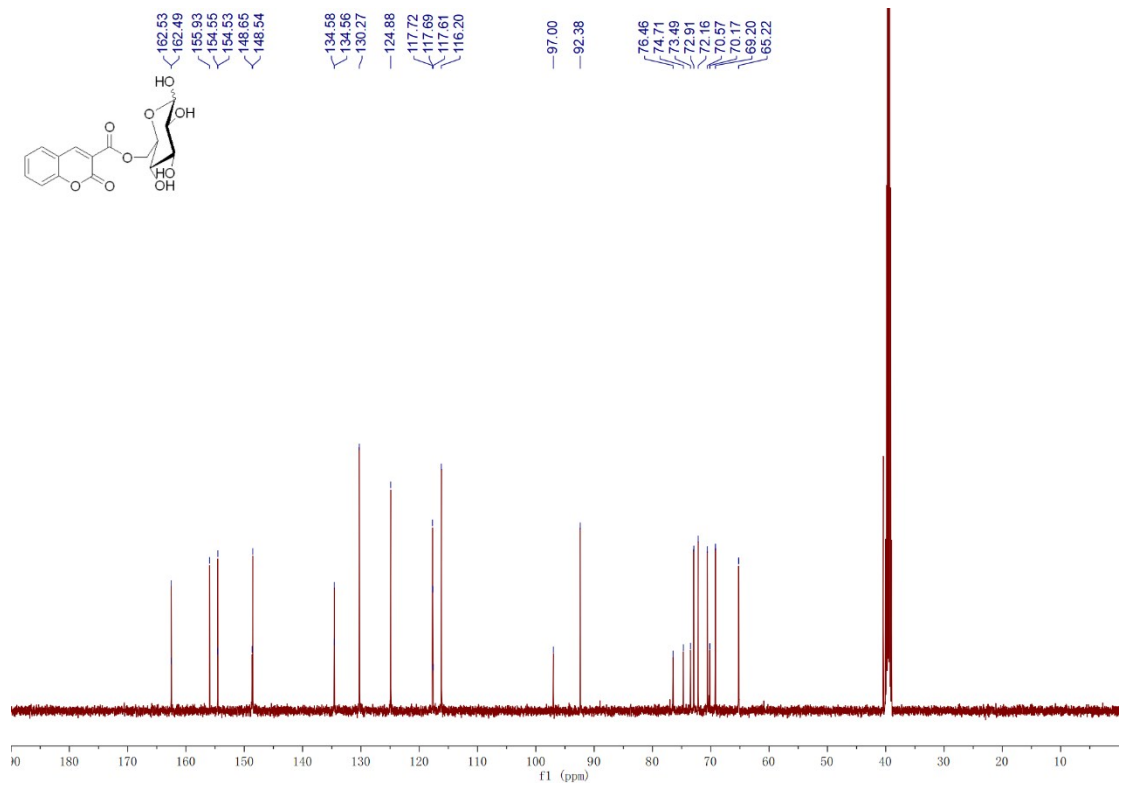

5b

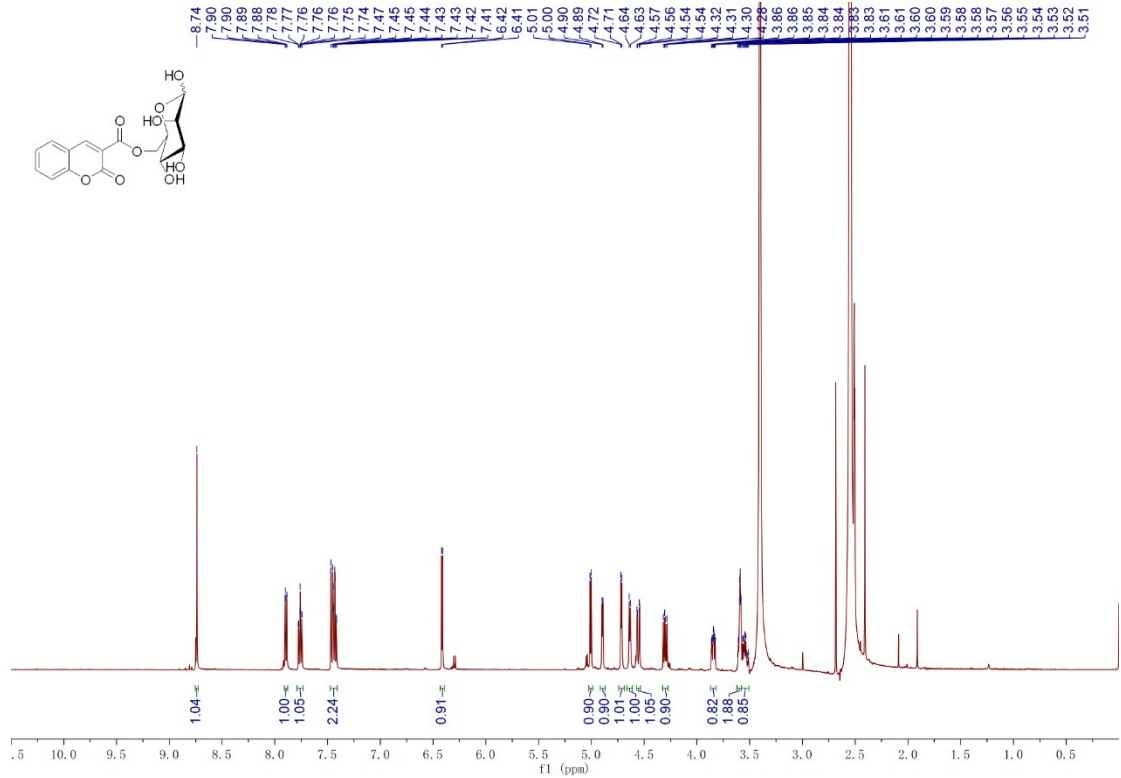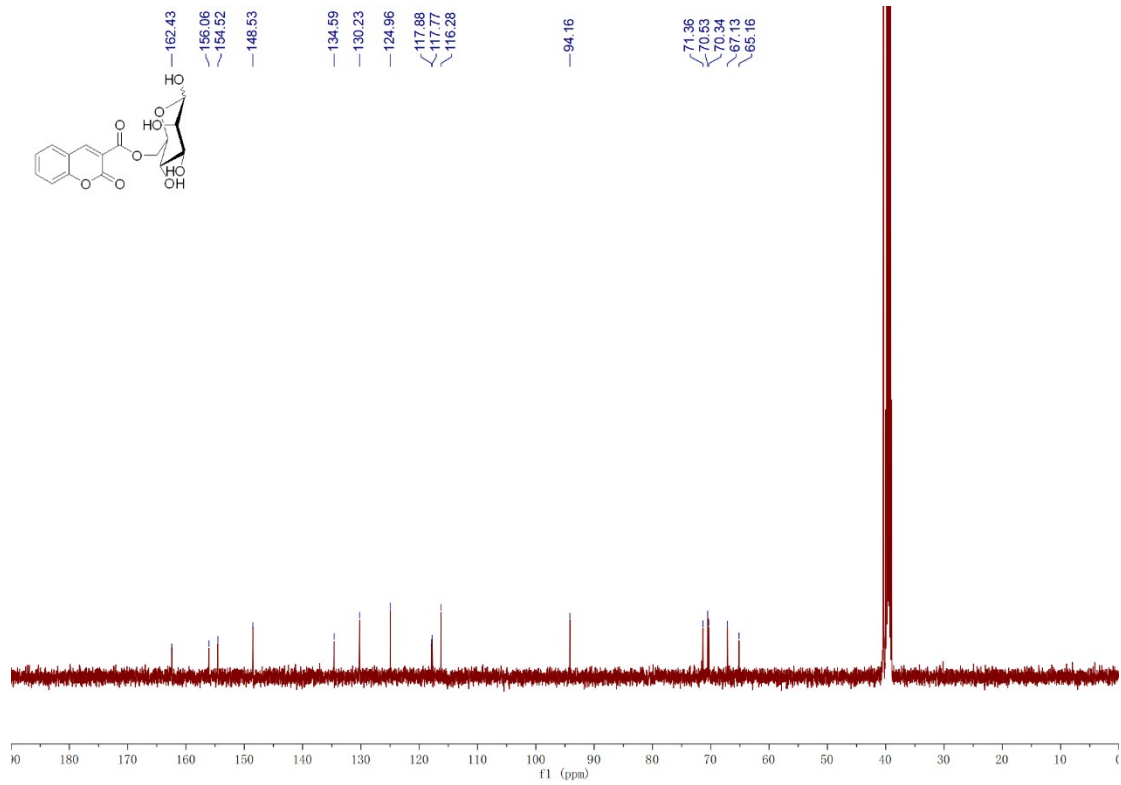

5c

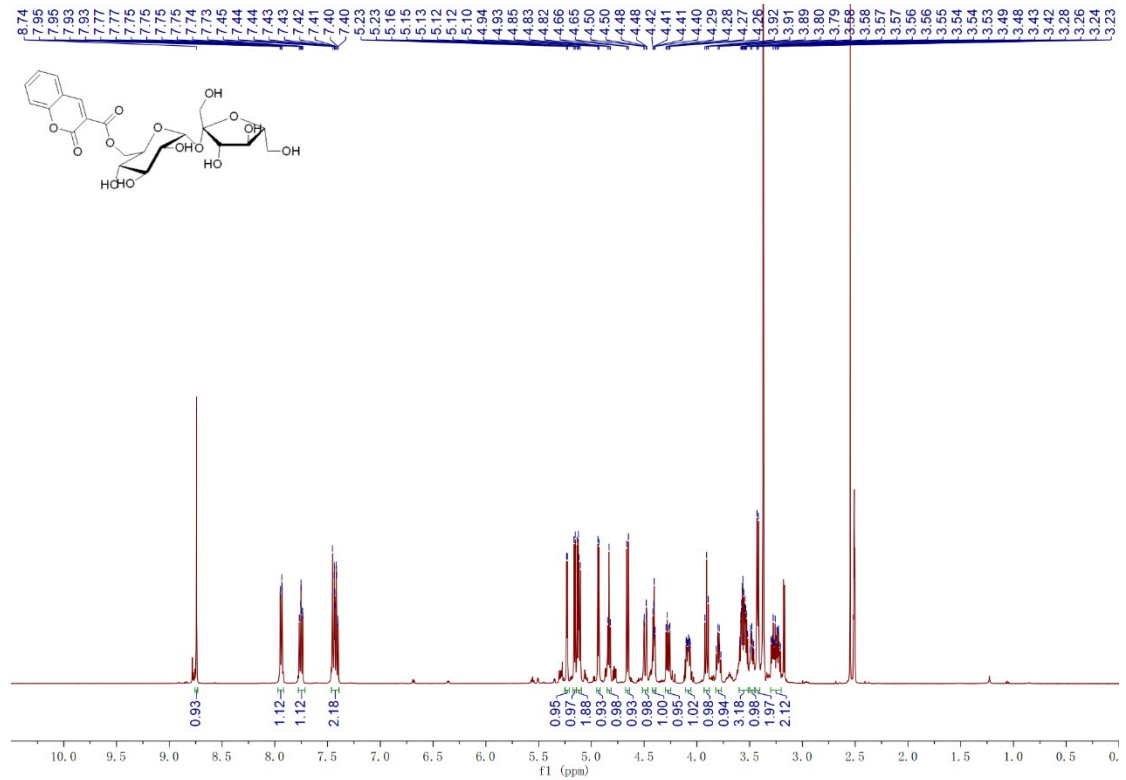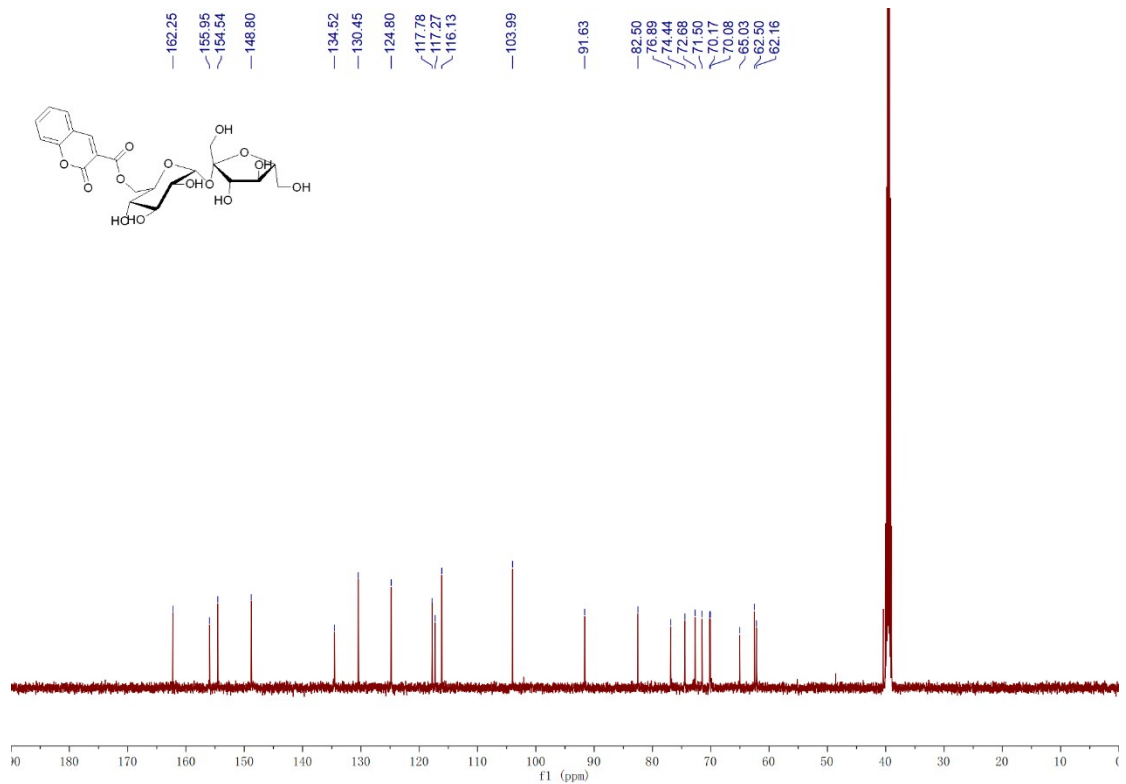

5d

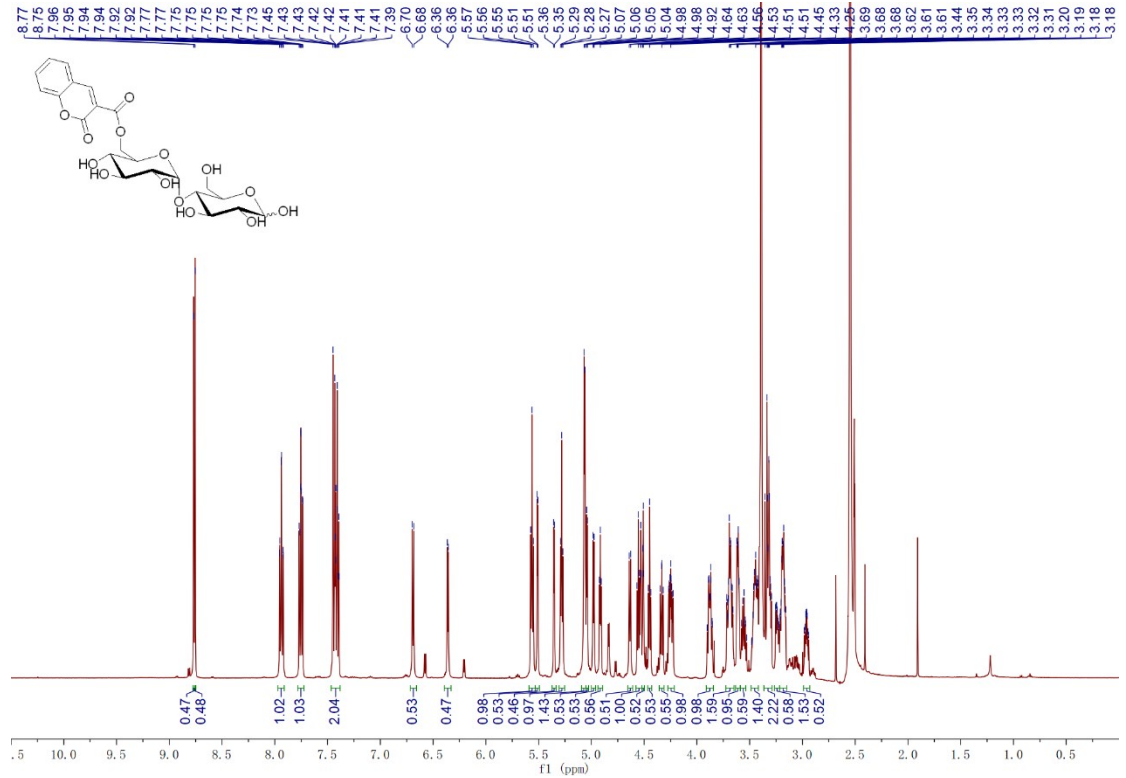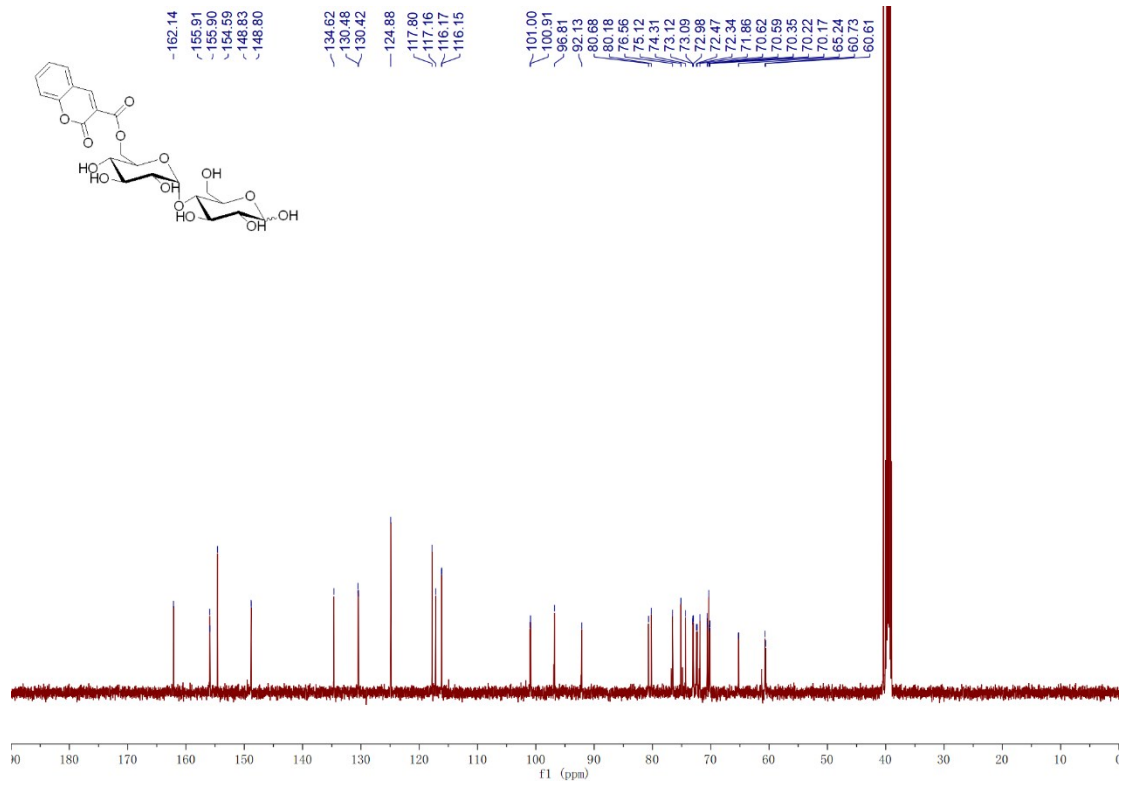



5e

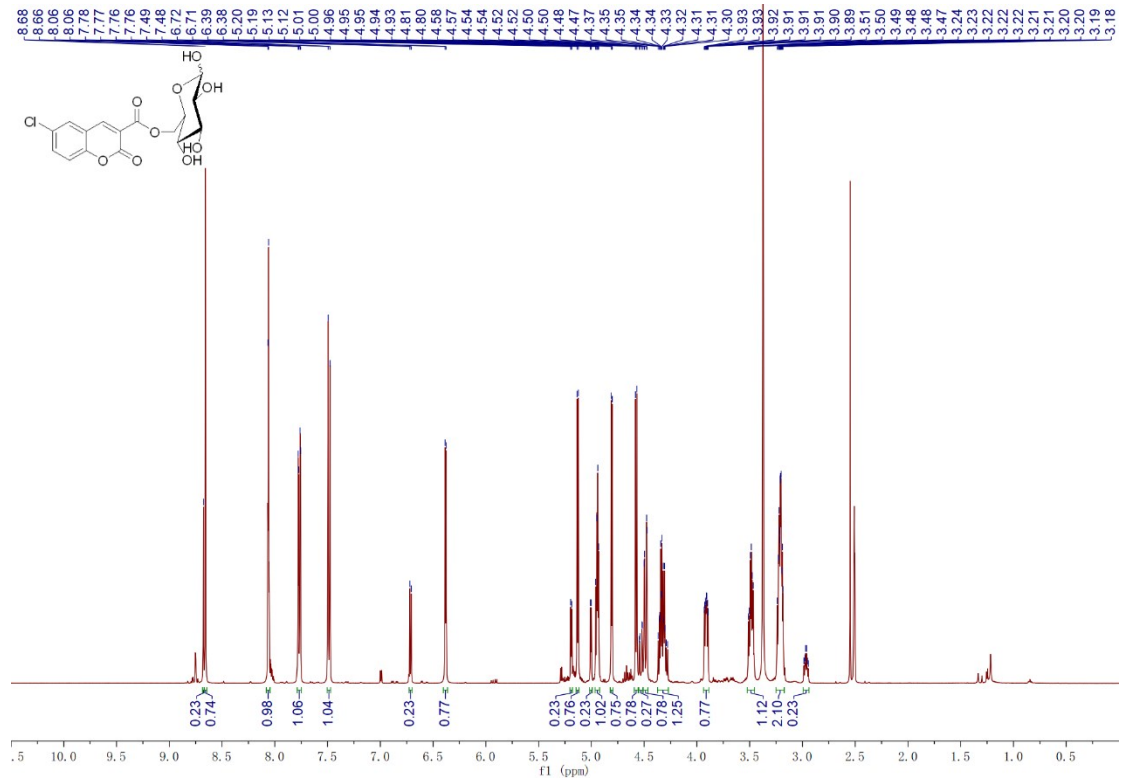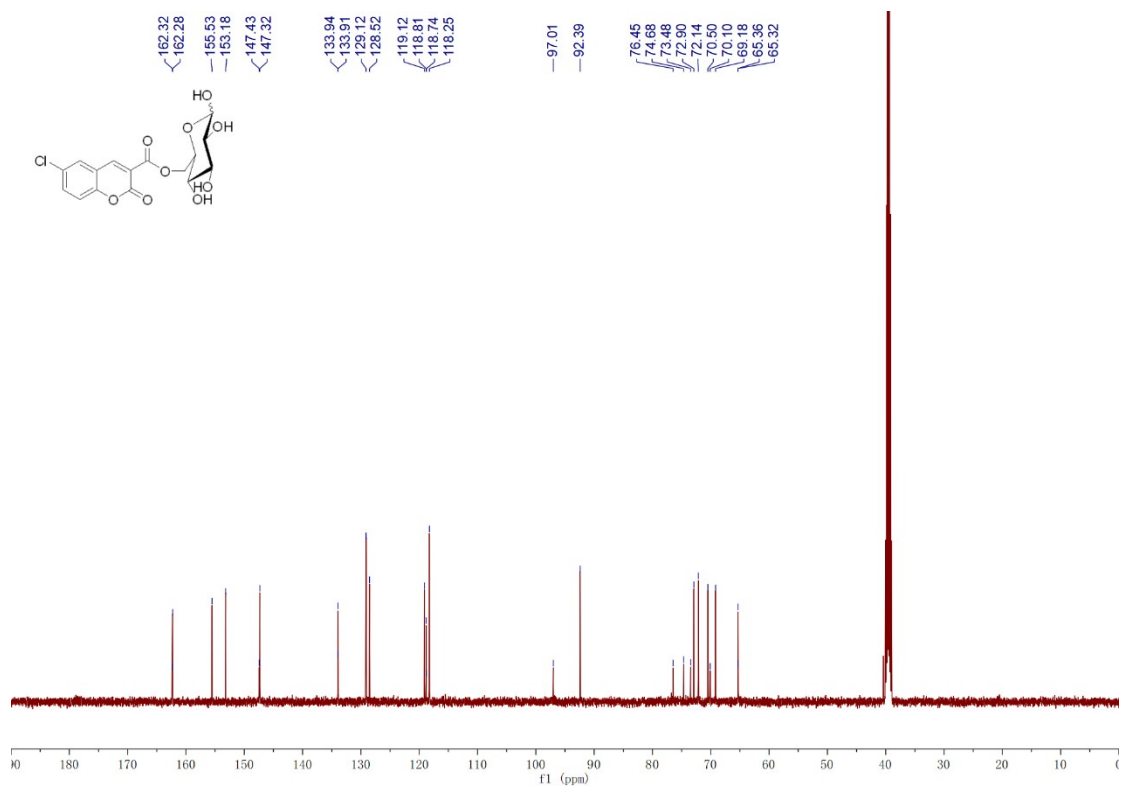

5f

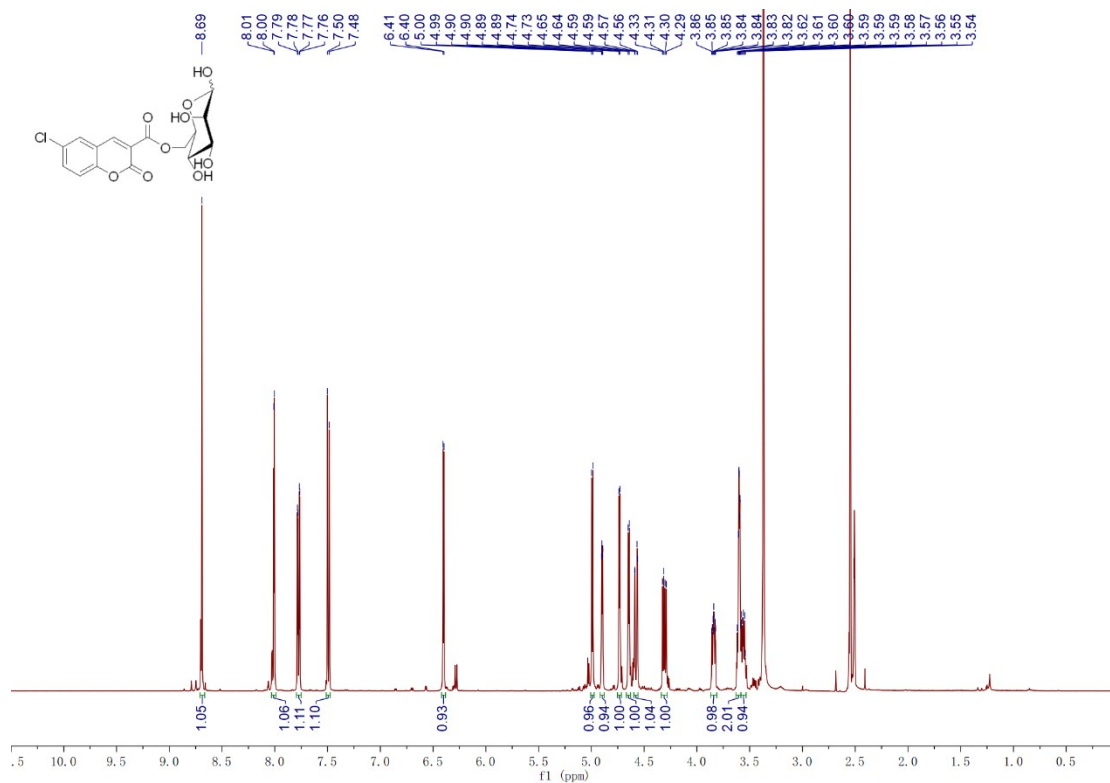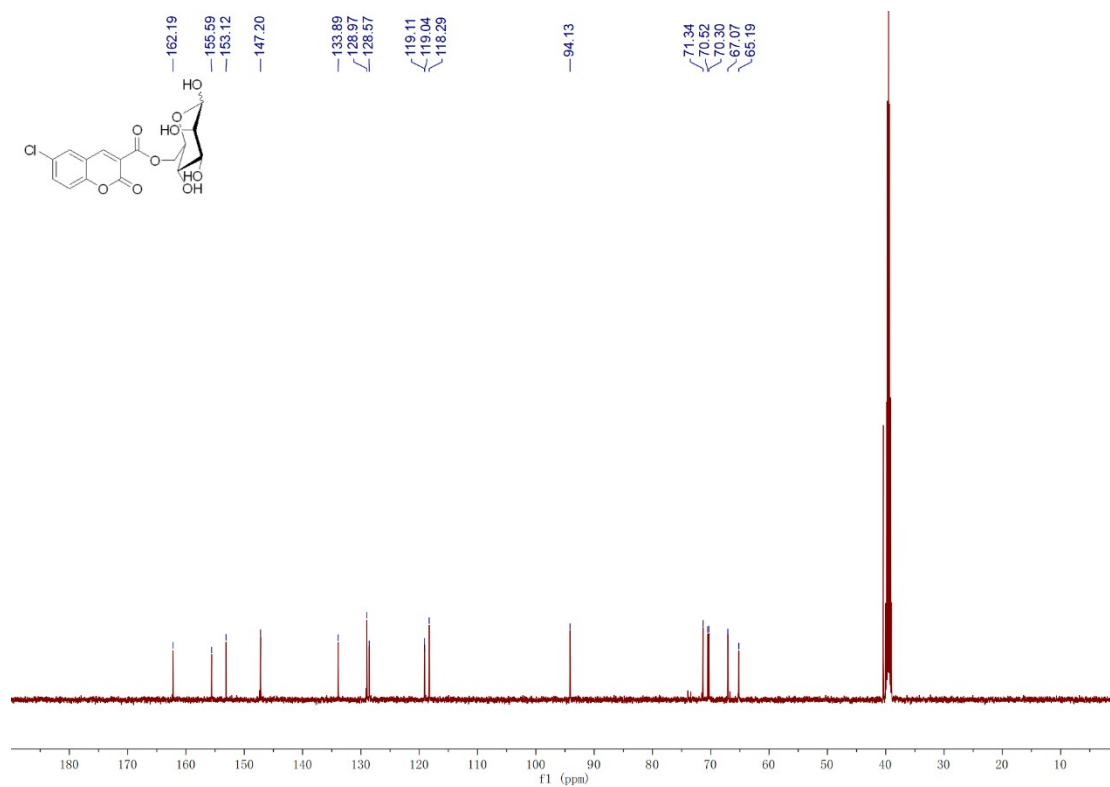

5g

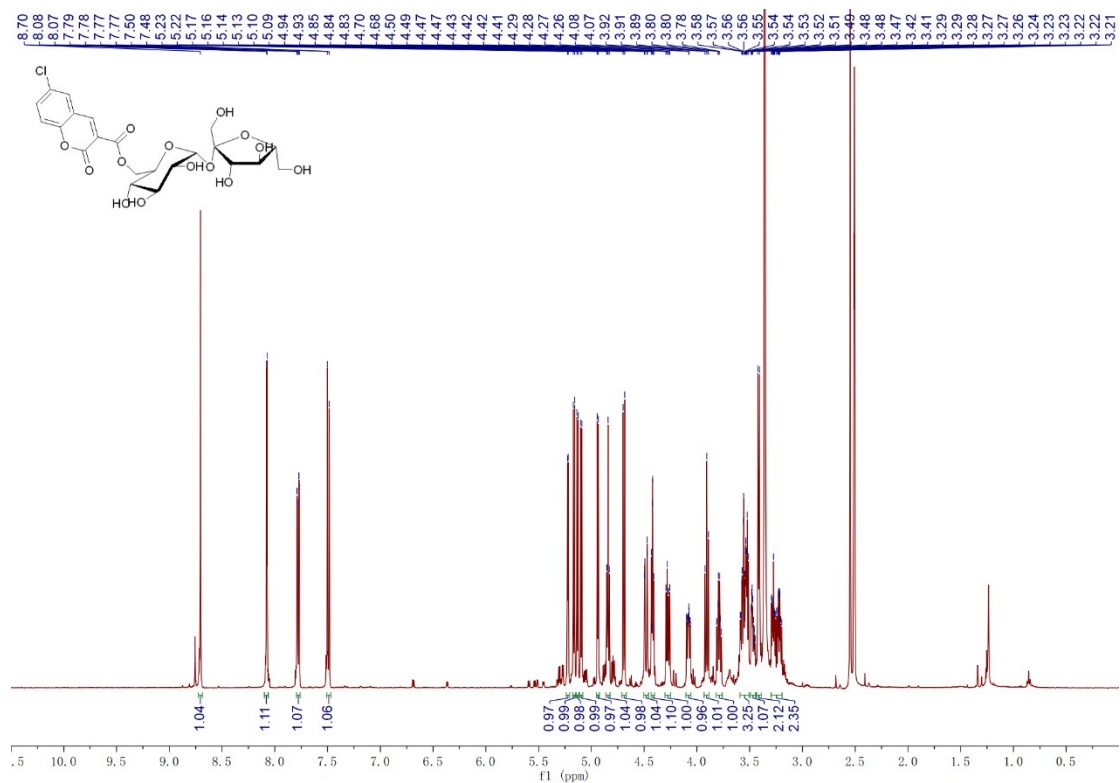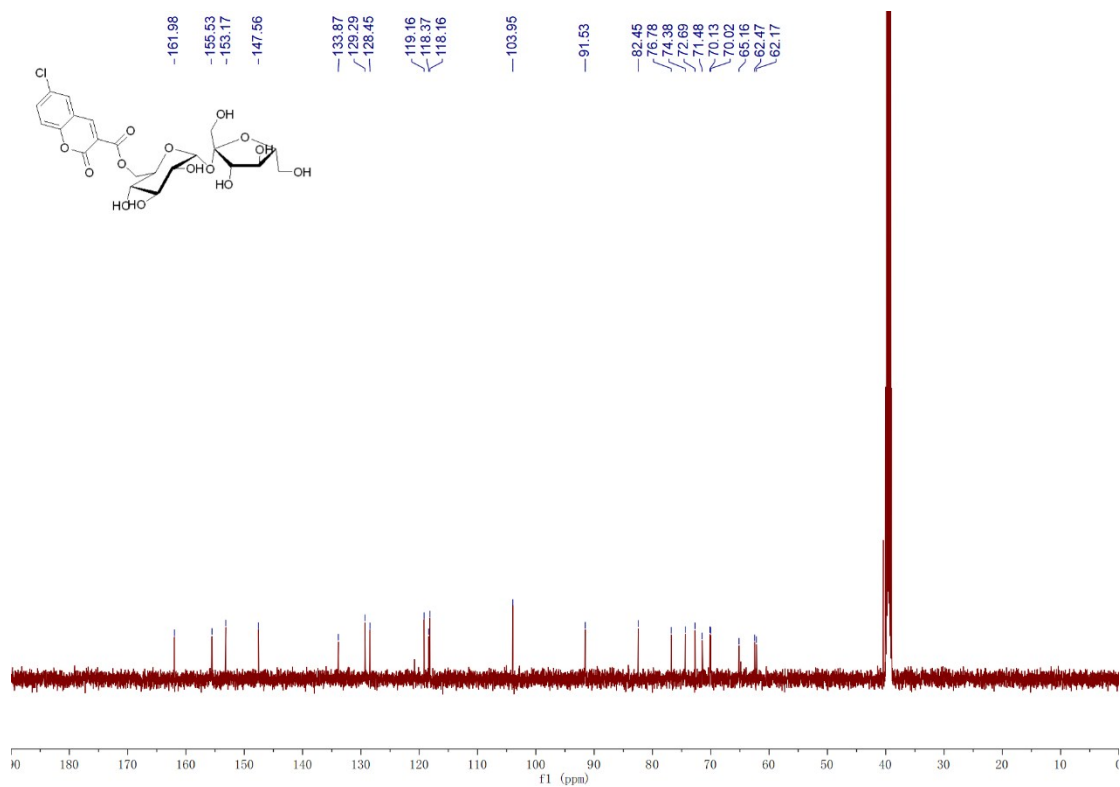

5h

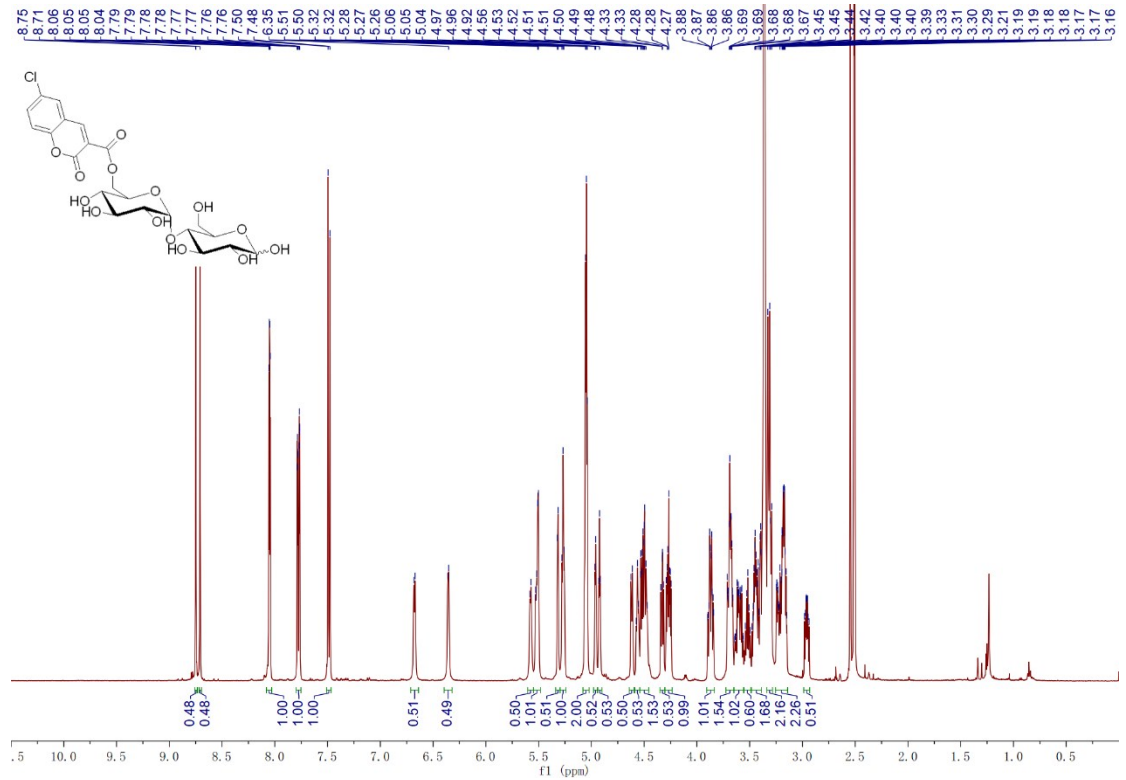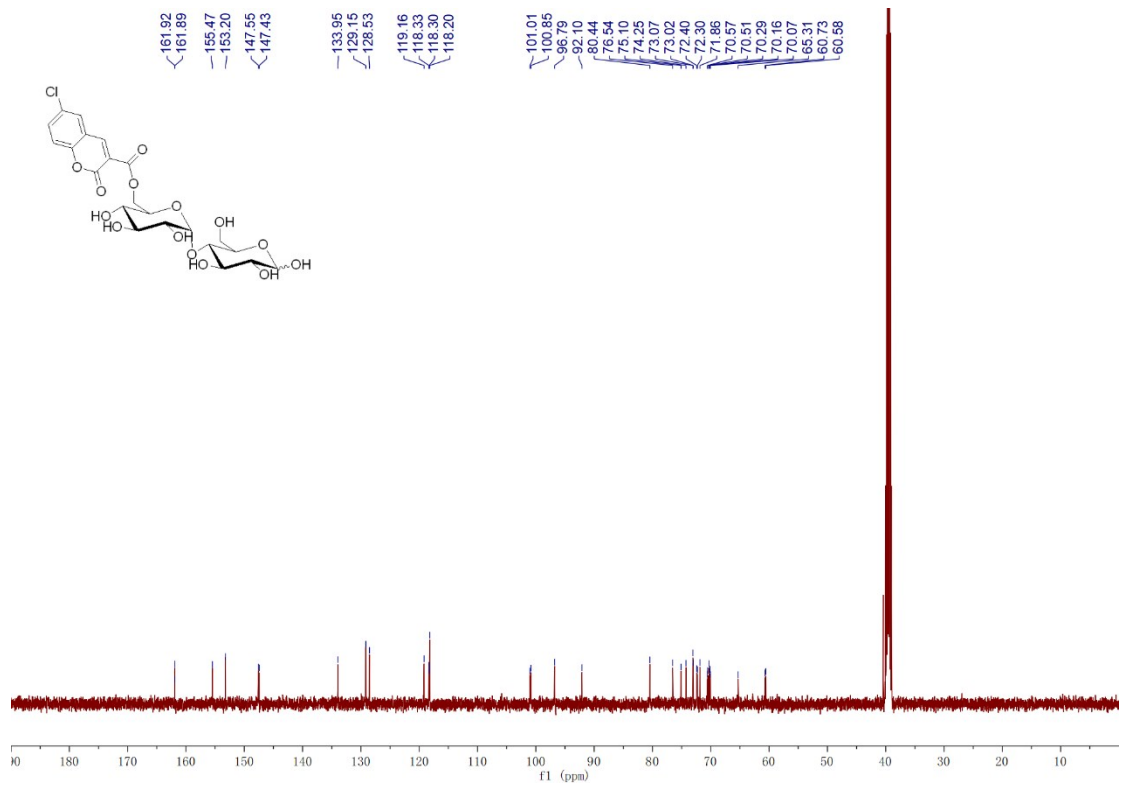

5i

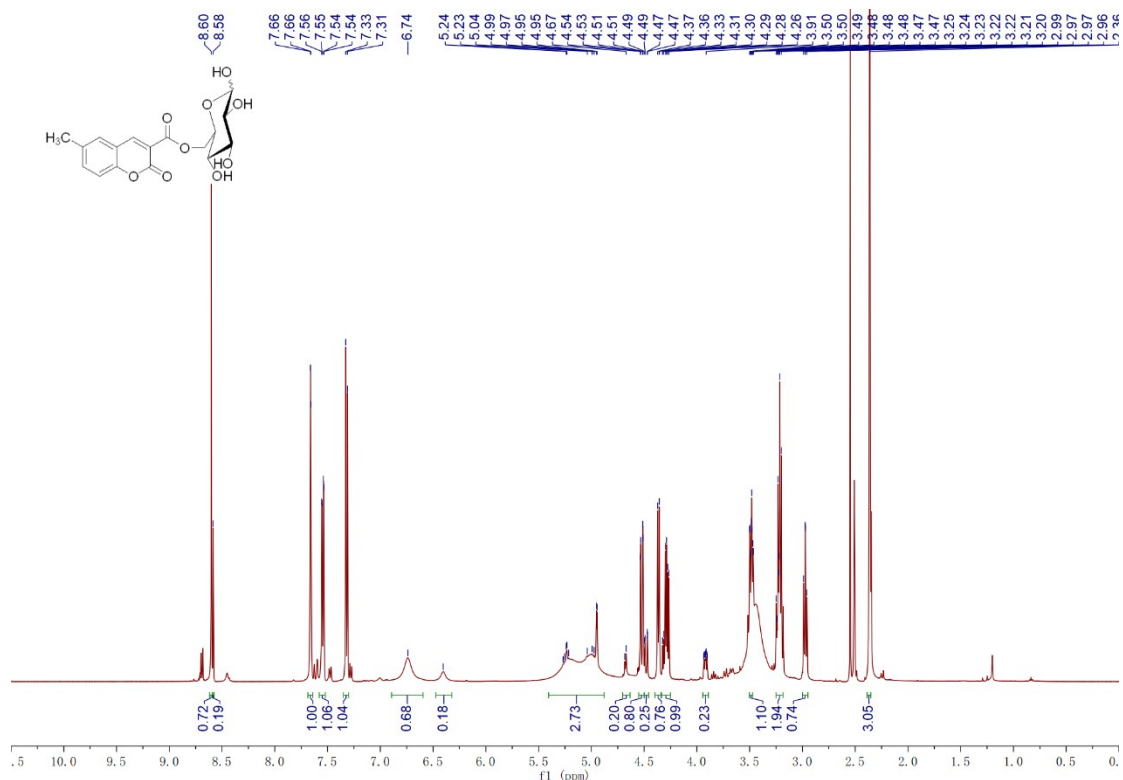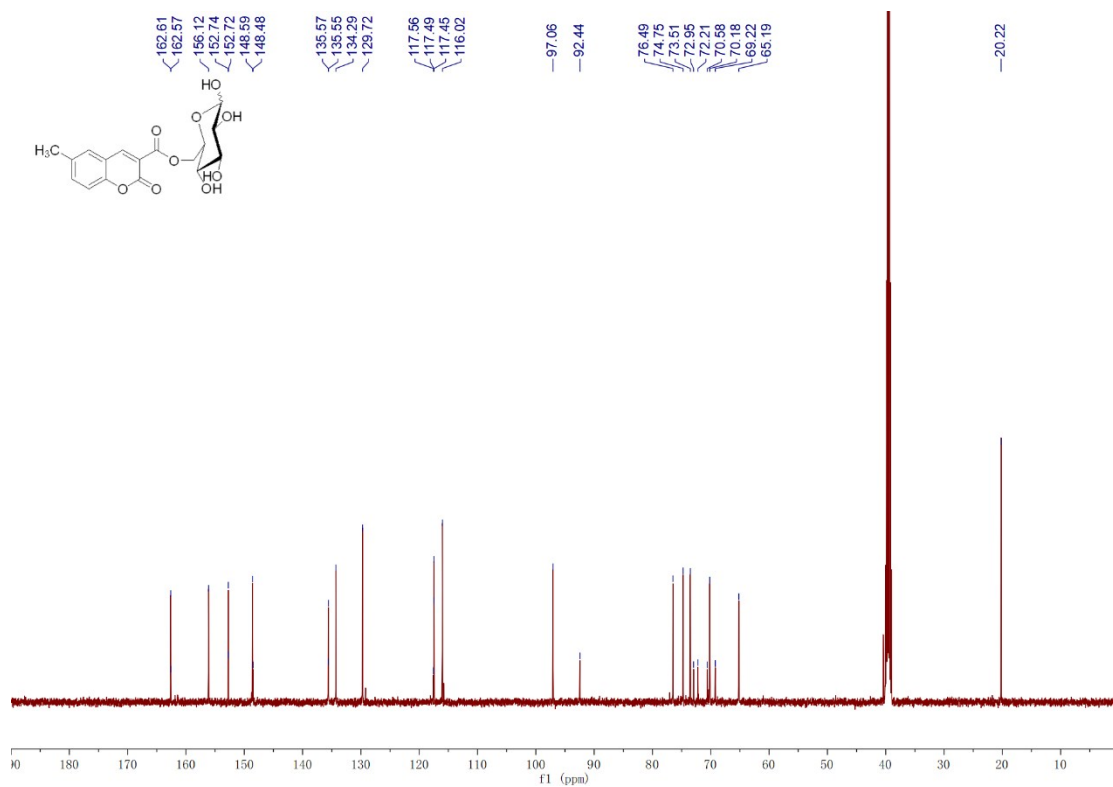

5j

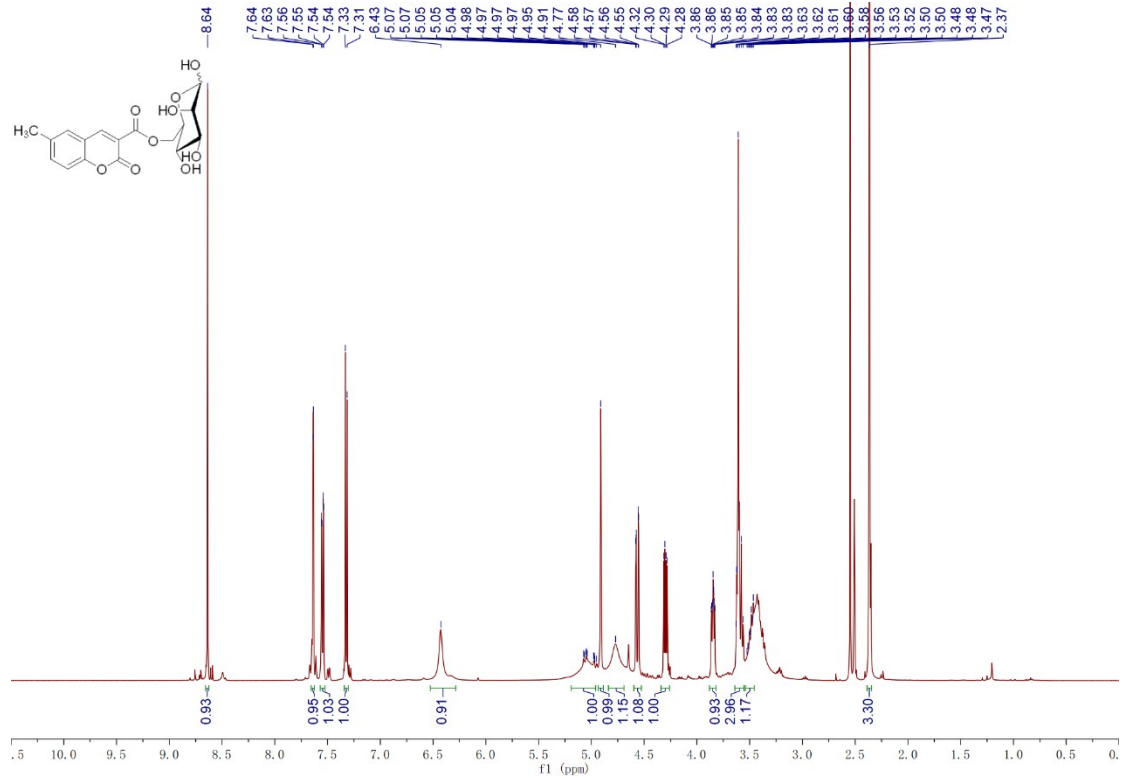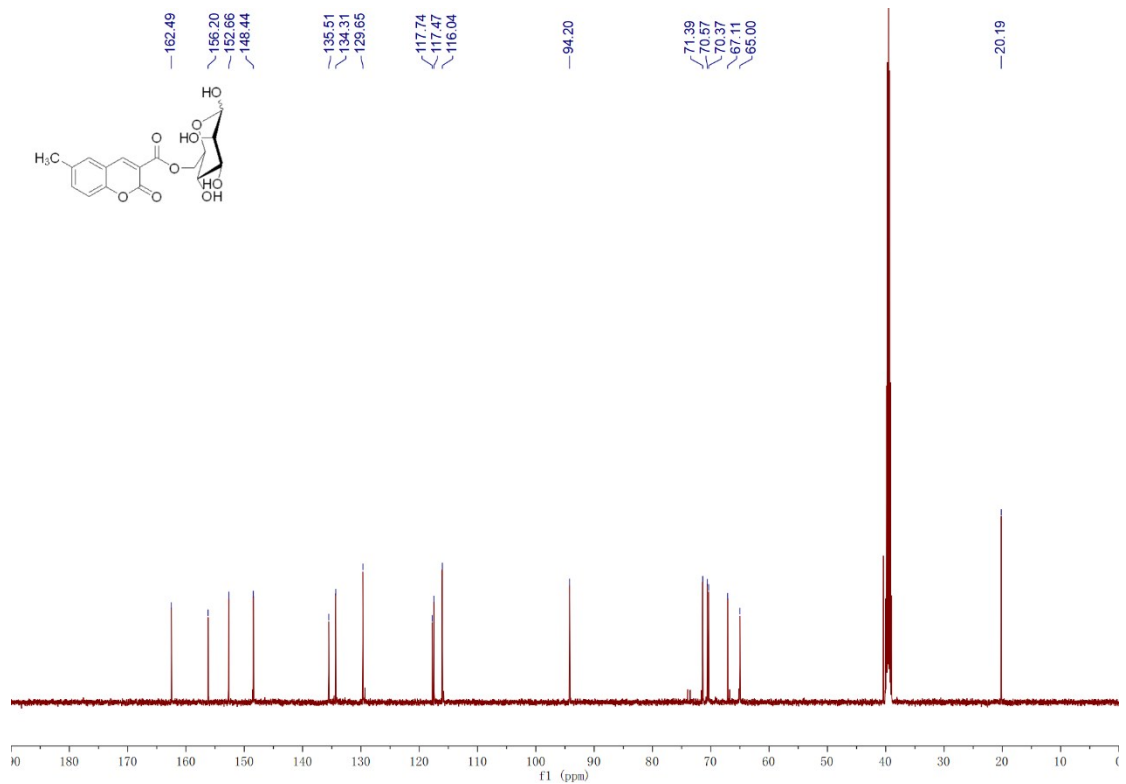

5k

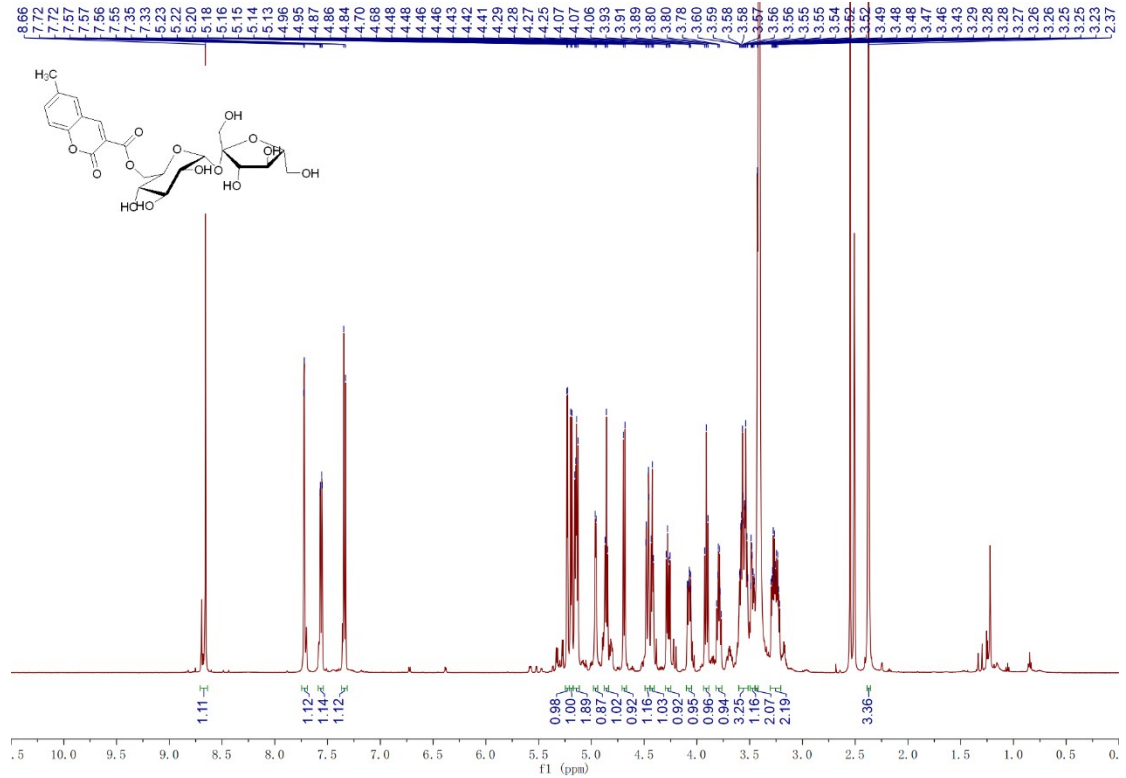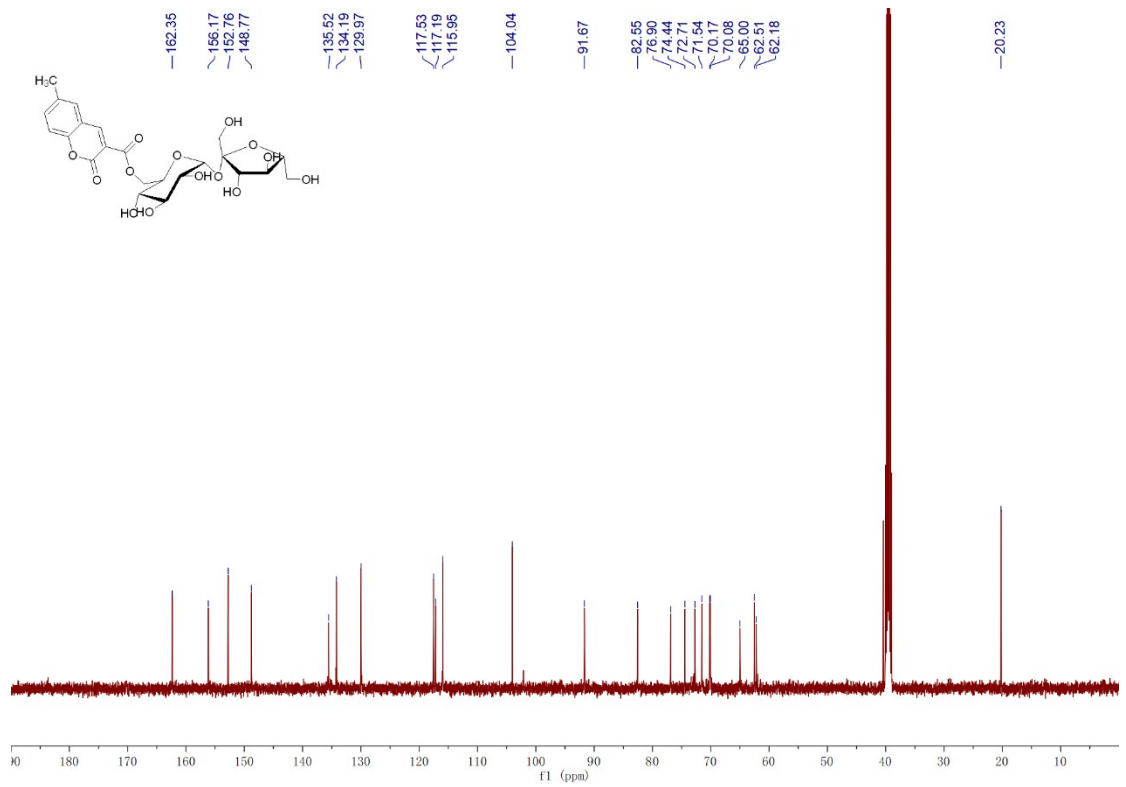

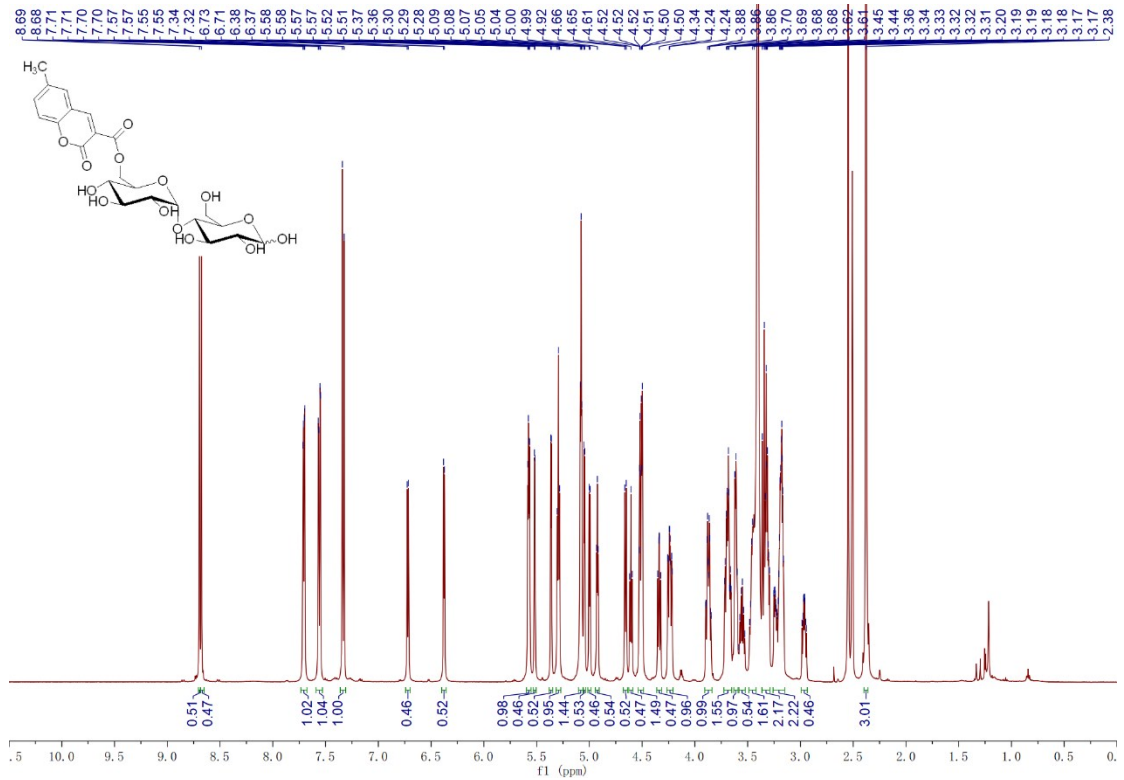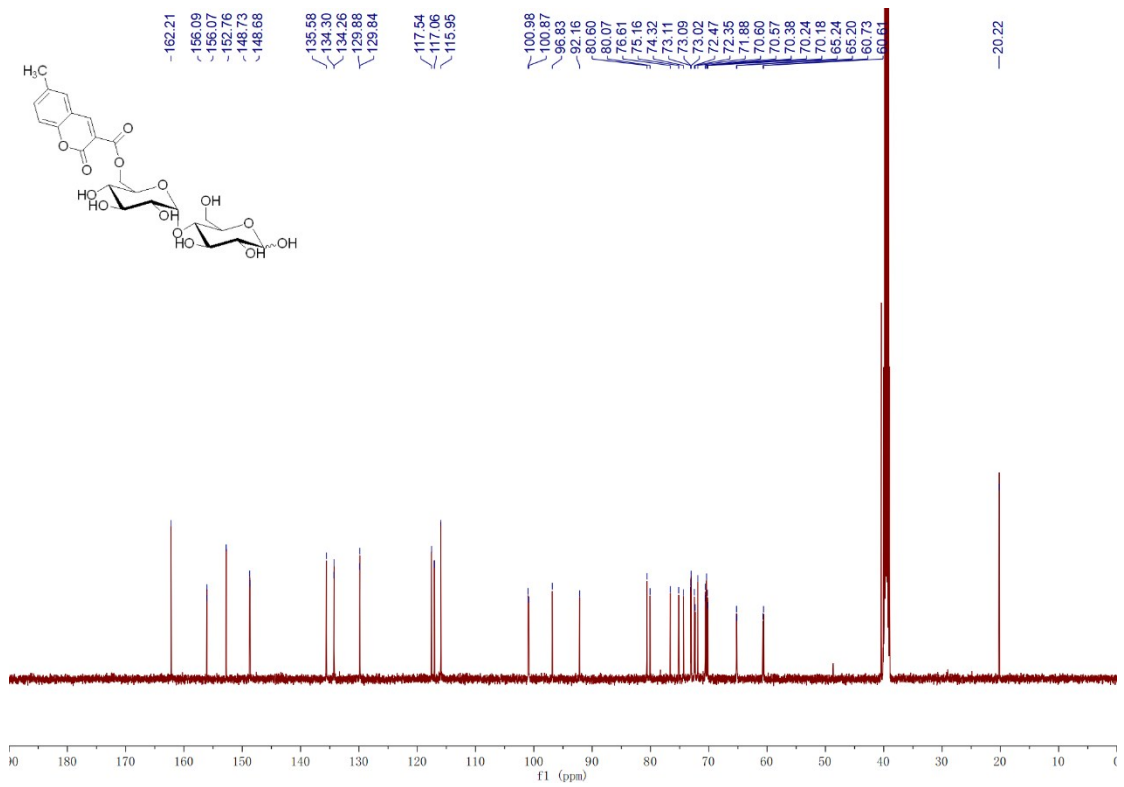



5m

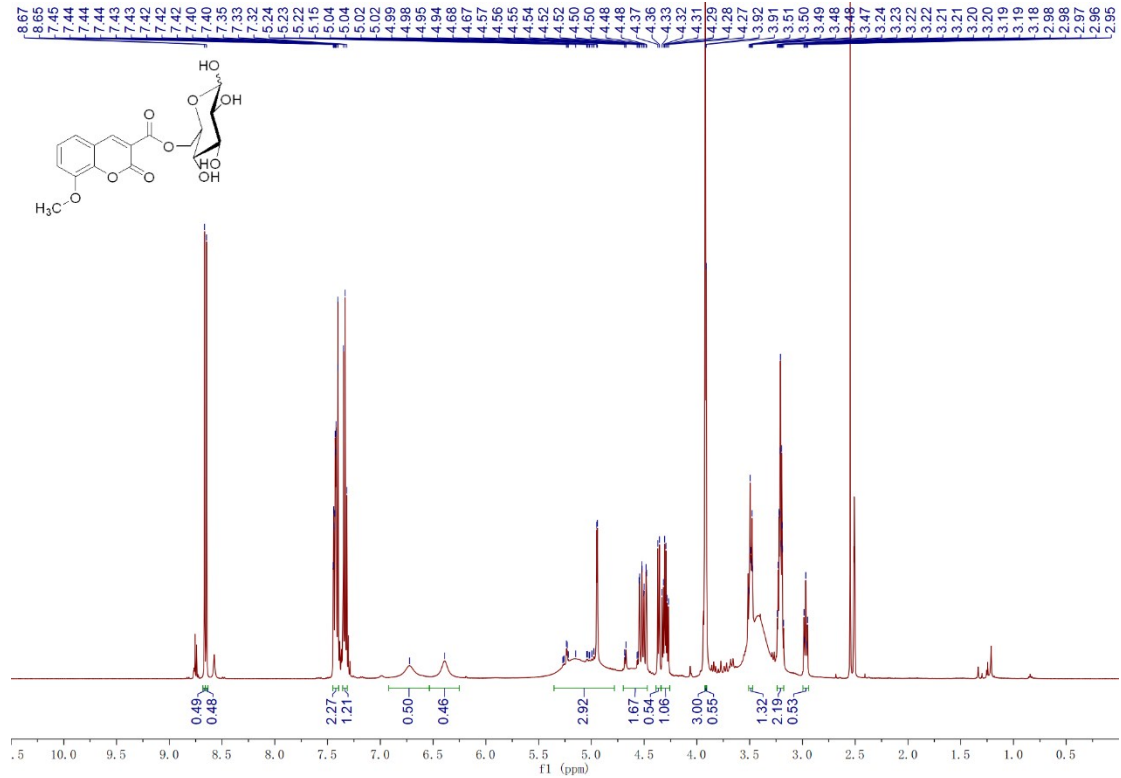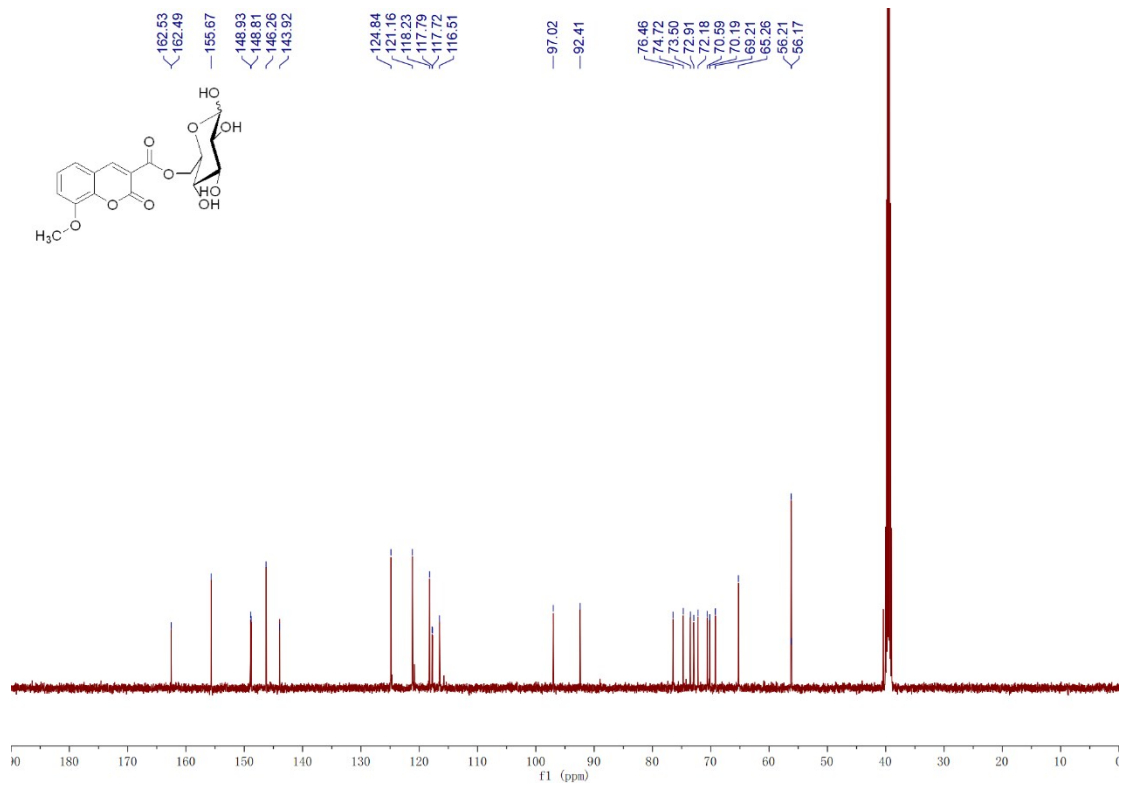

5n

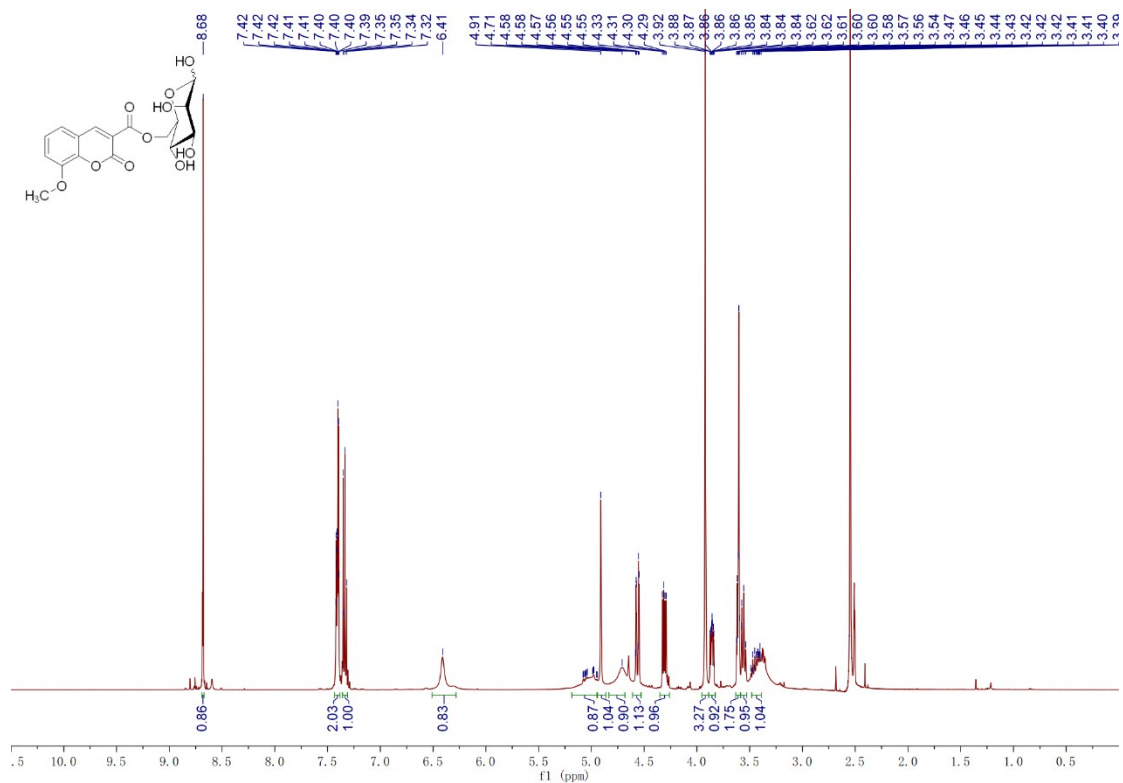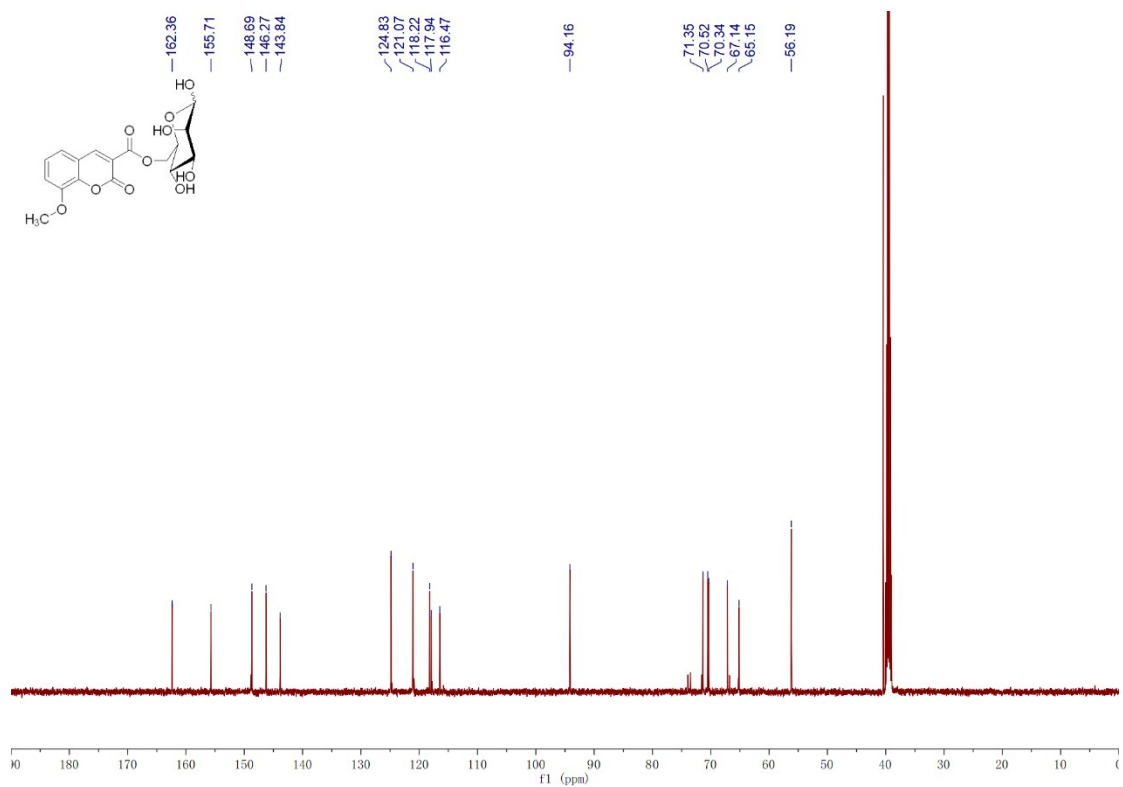

50

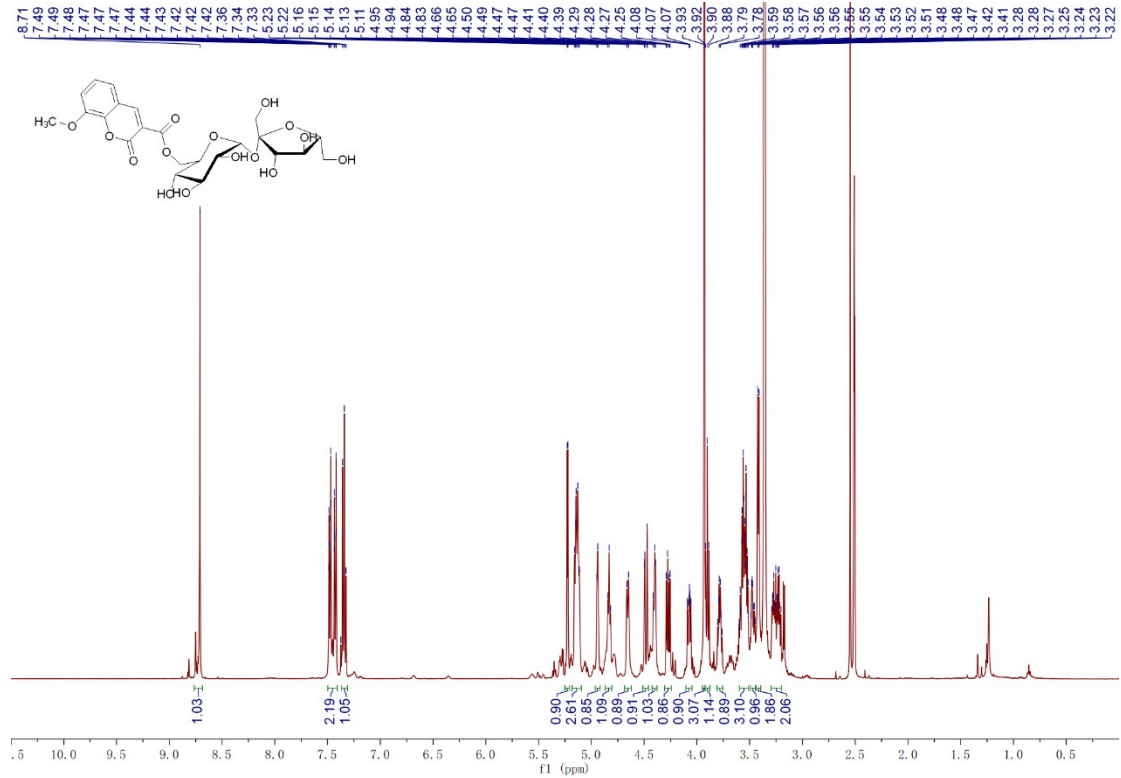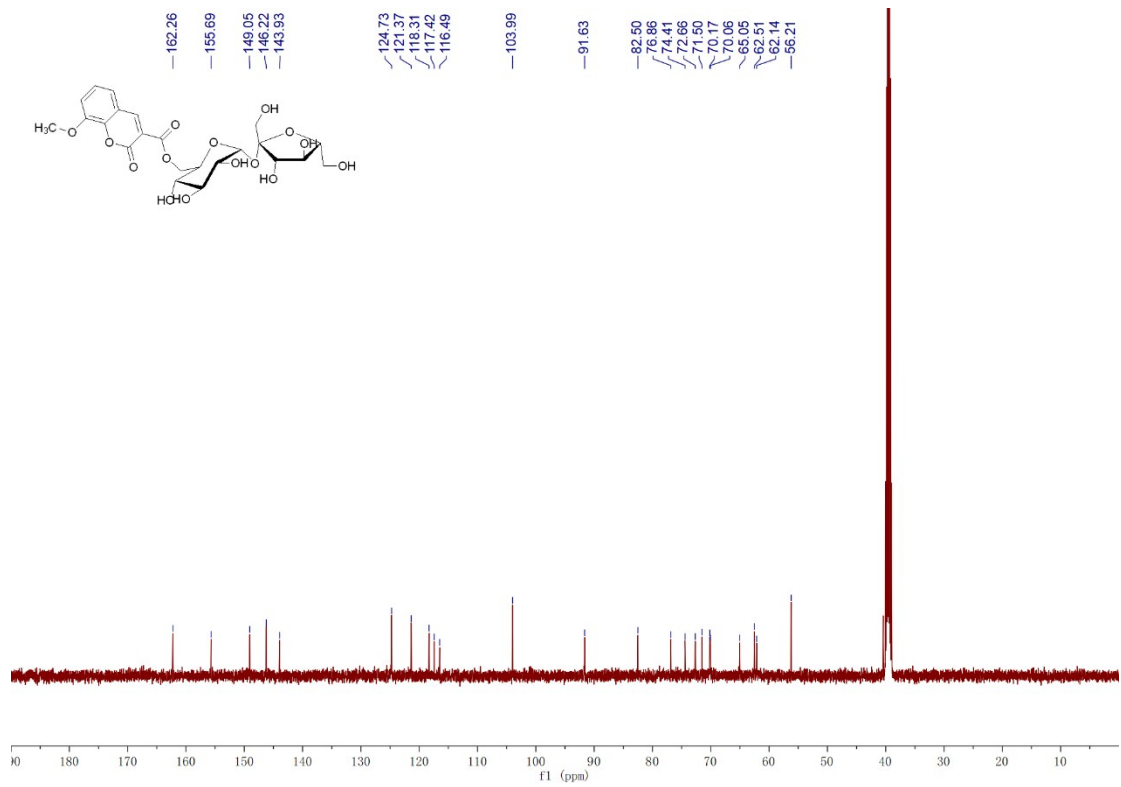

5p

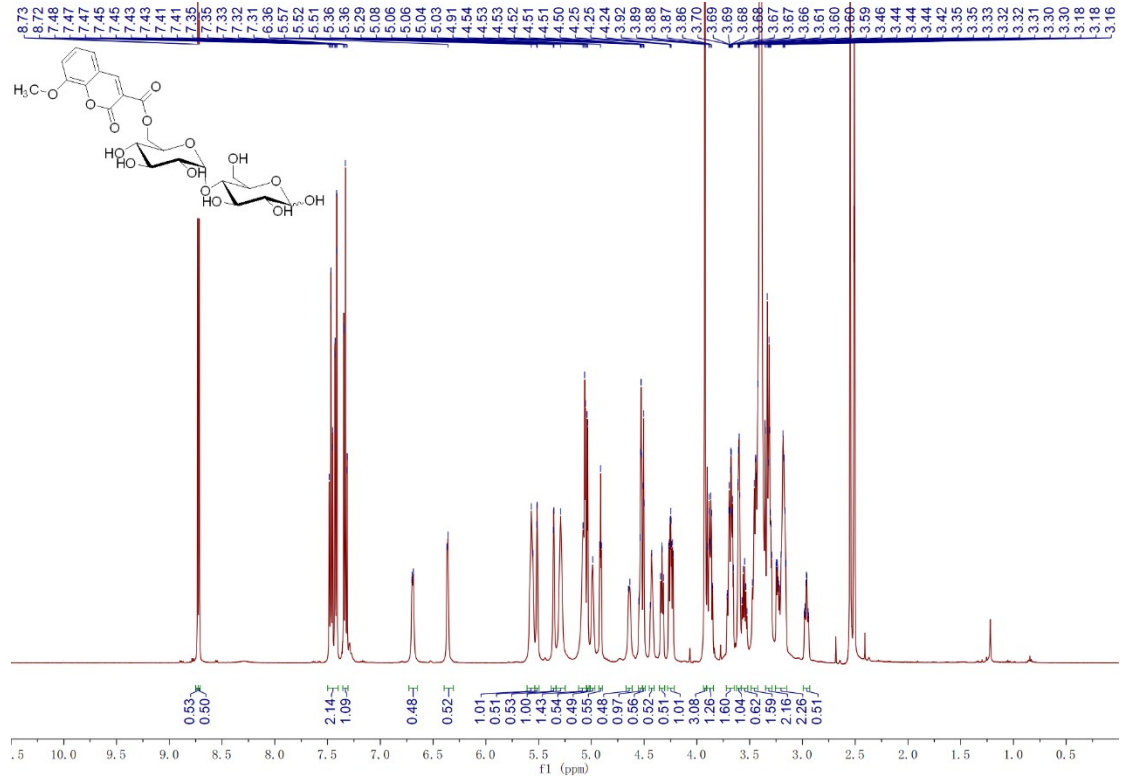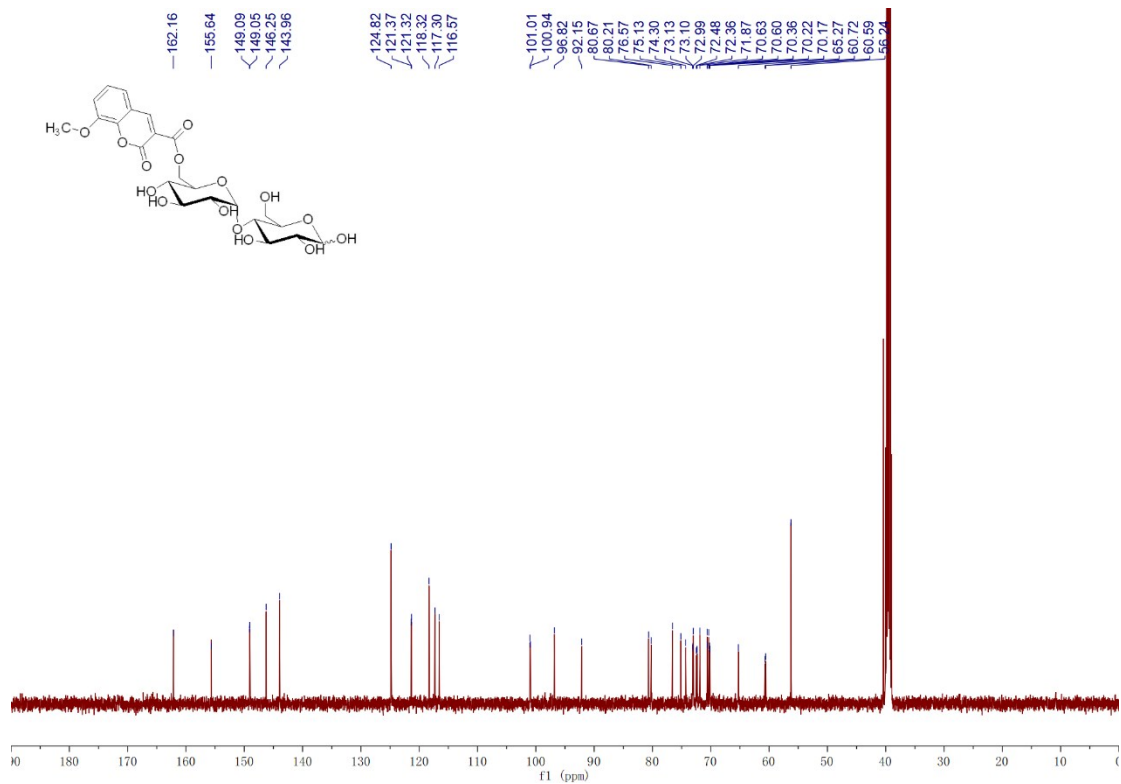

5q

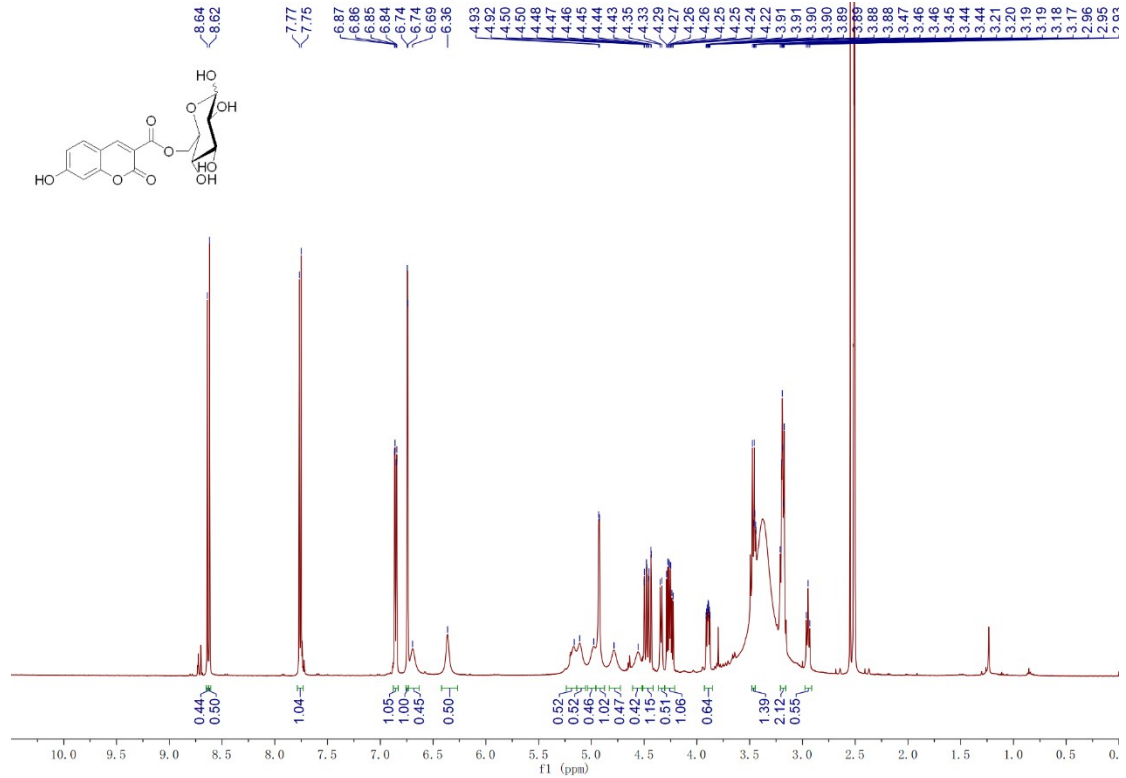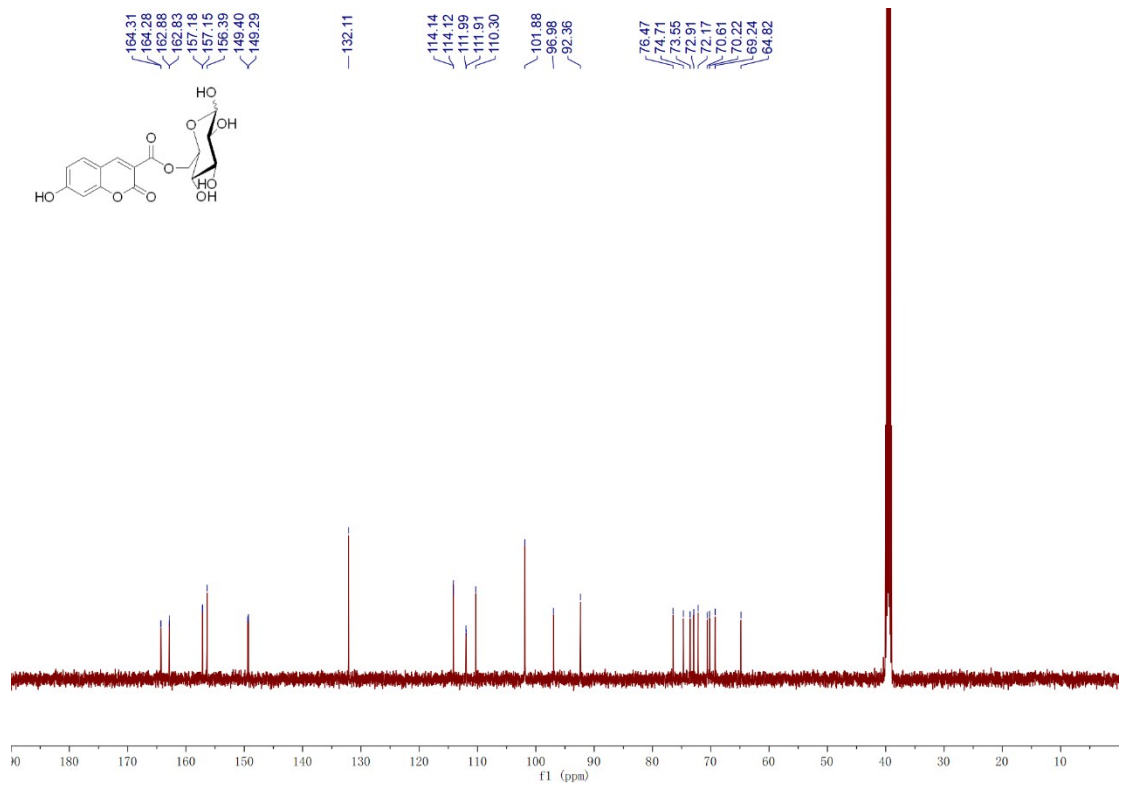

5r

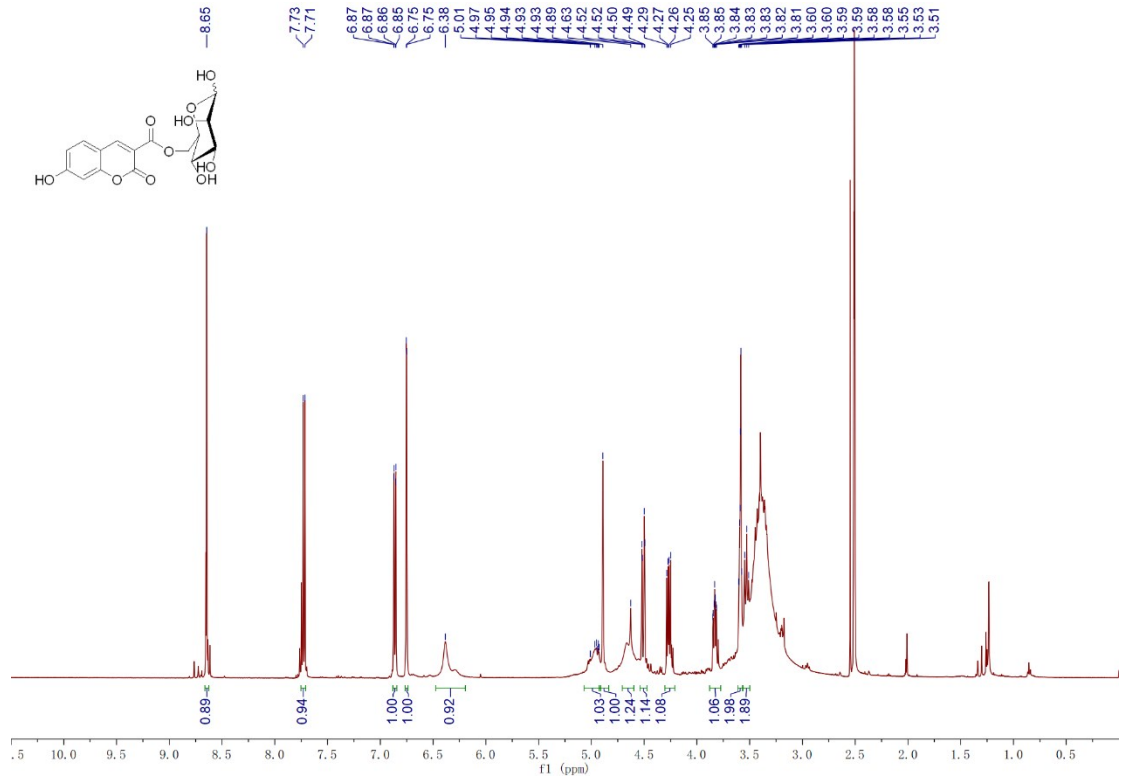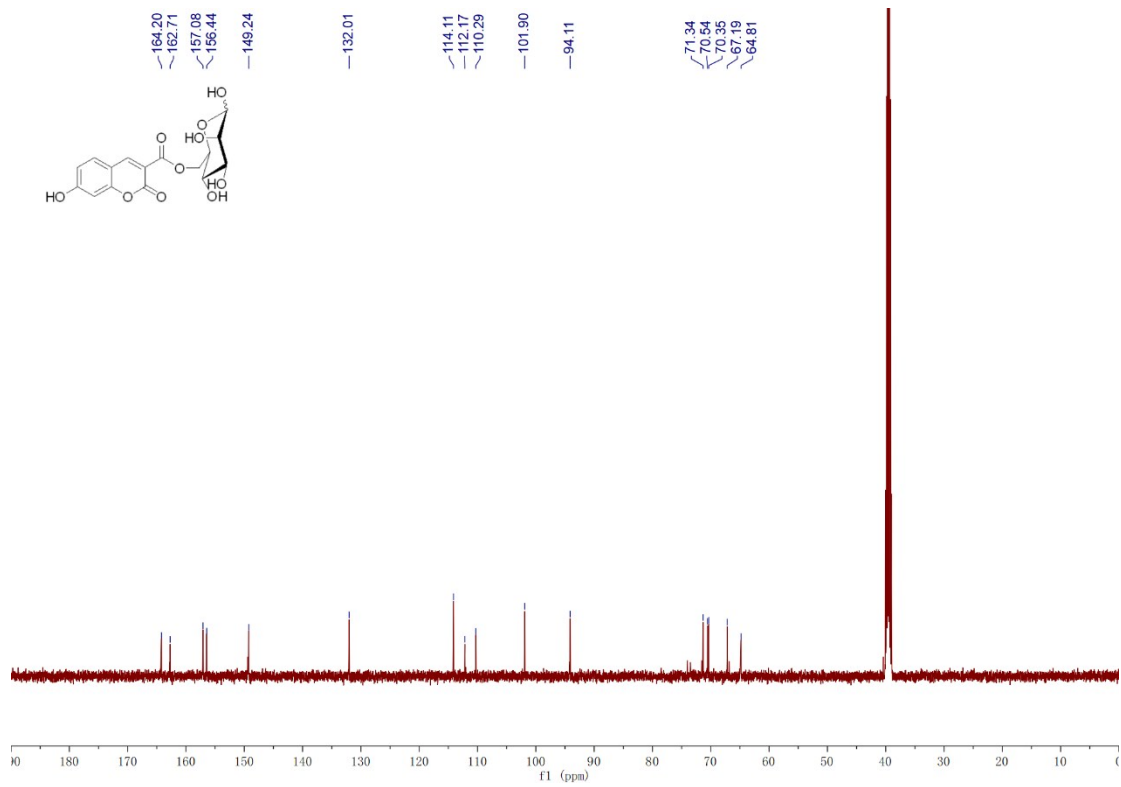

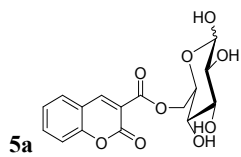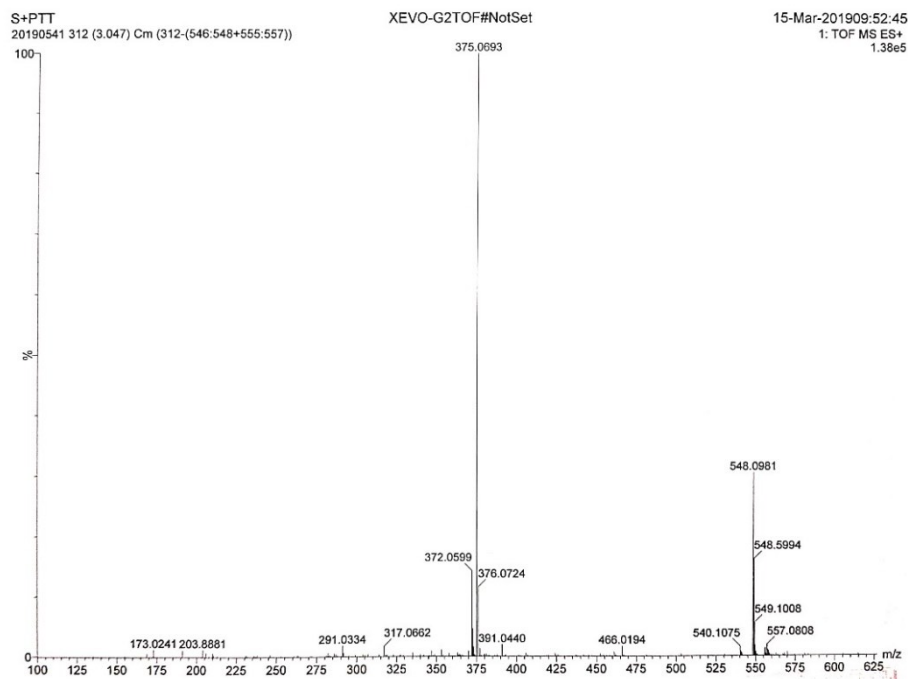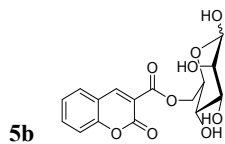

S+GLT  
20190542 121 (1.193) Cm (121-(14:18+24:26))

XEVO-G2TOF#NotSet

15-Mar-2019 10:02:21  
1: TOF MS ES+  
6.13e4

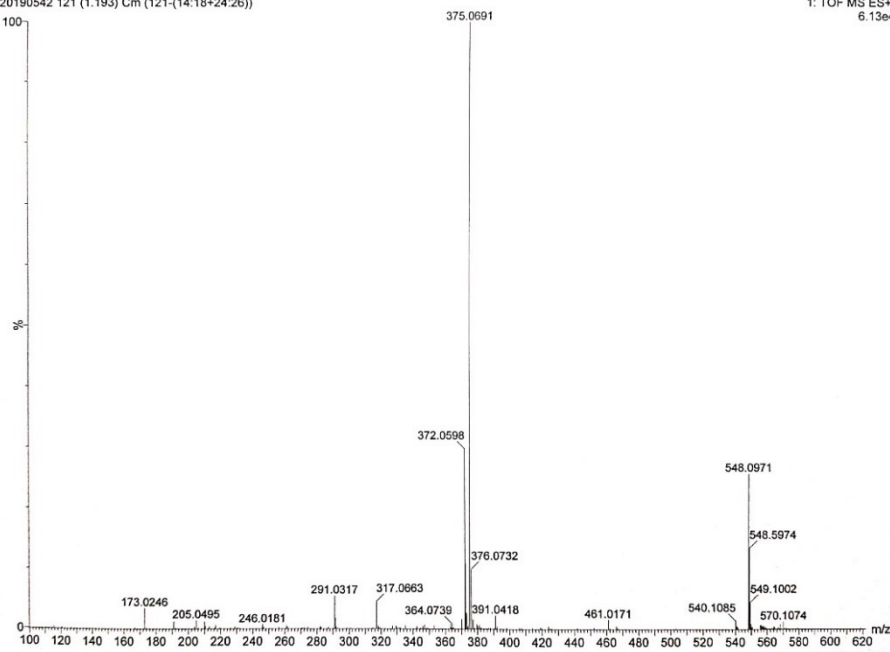

5e

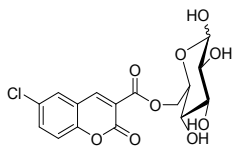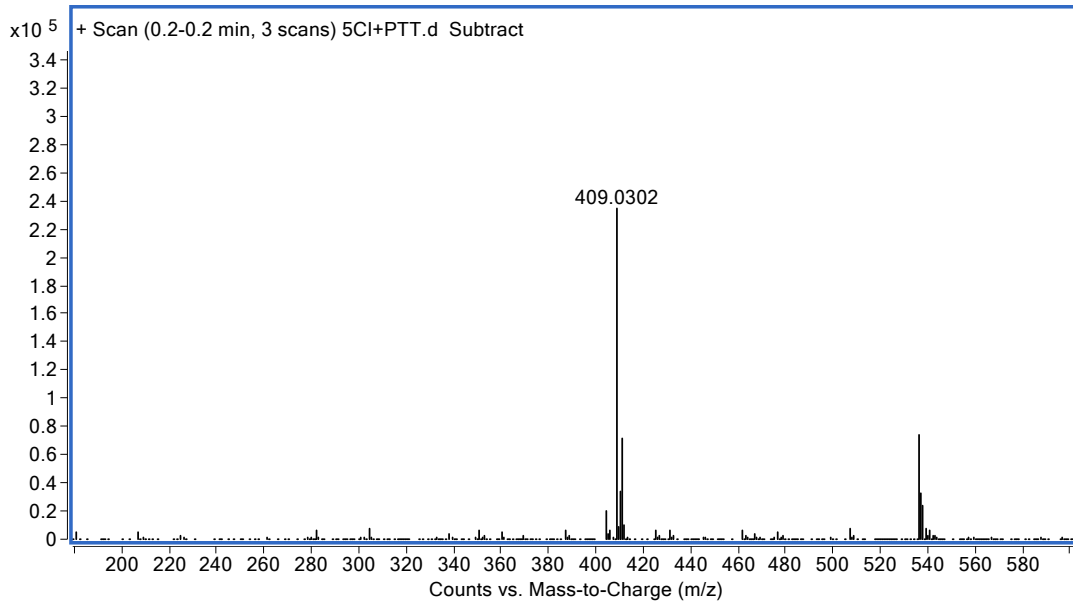



| Formula (M)   | Calc m/z | Diff (ppm) | Ion Formula      | m/z      |
|---------------|----------|------------|------------------|----------|
| C16 H15 Cl O9 | 409.0297 | -1.34      | C16 H15 Cl Na O9 | 409.0302 |

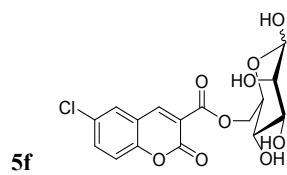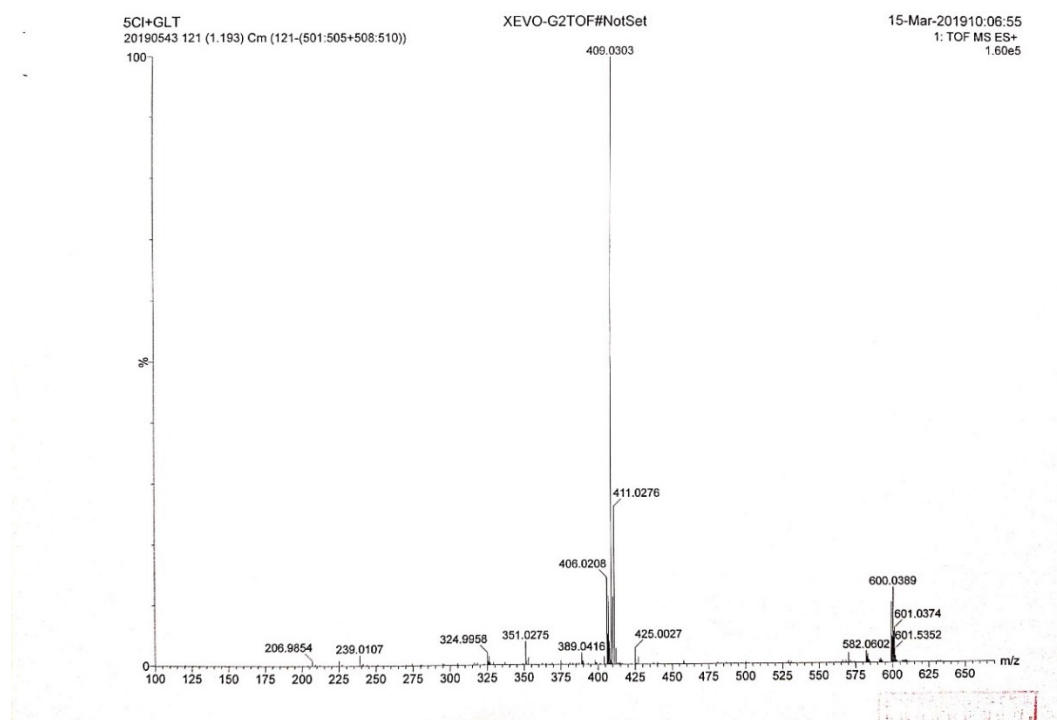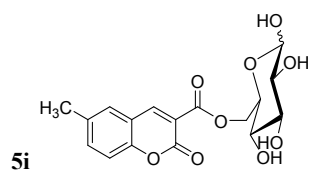

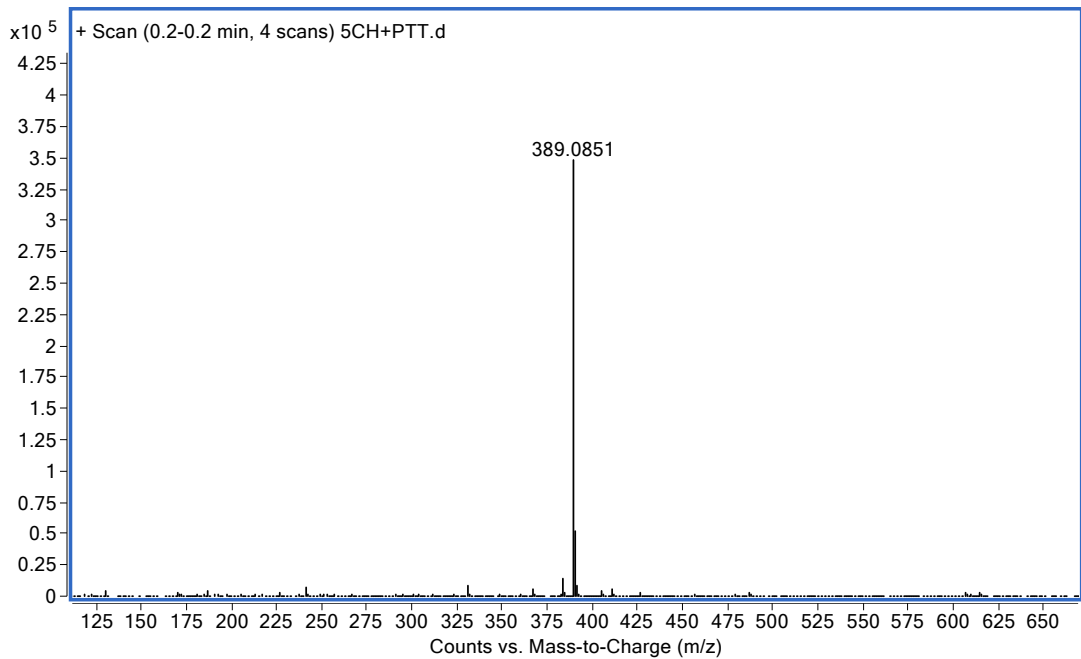

| Formula (M) | Ion Formula   | m/z      | Calc m/z | Diff (ppm) |
|-------------|---------------|----------|----------|------------|
| C17 H18 O9  | C17 H18 Na O9 | 389.0851 | 389.0843 | -2.18      |

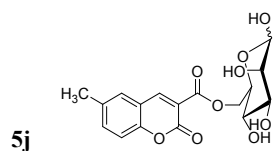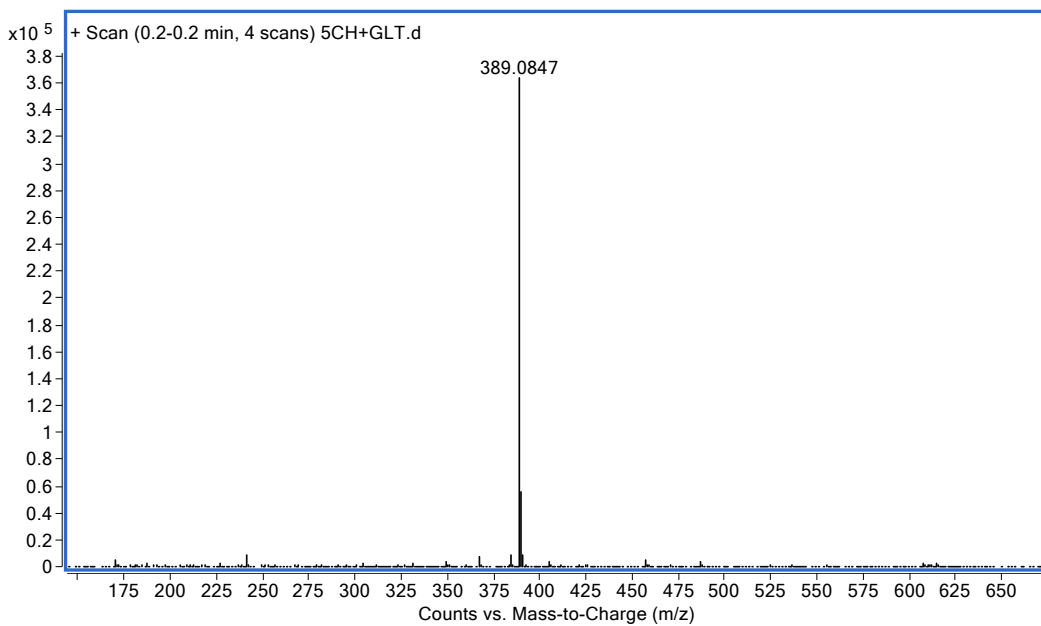

| Formula (M) | Ion Formula   | m/z      | Calc m/z | Diff (ppm) |
|-------------|---------------|----------|----------|------------|
| C17 H18 O9  | C17 H18 Na O9 | 389.0847 | 389.0843 | -1.08      |

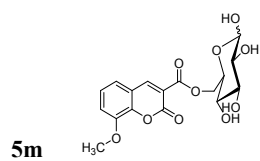

30CH+PTT  
20190544 71 (0.705) Cm (71-(14:16+33:36))

XEVO-G2TOF#NotSet

15-Mar-2019 10:26:15  
T: TOF MS ES+  
1.36e5

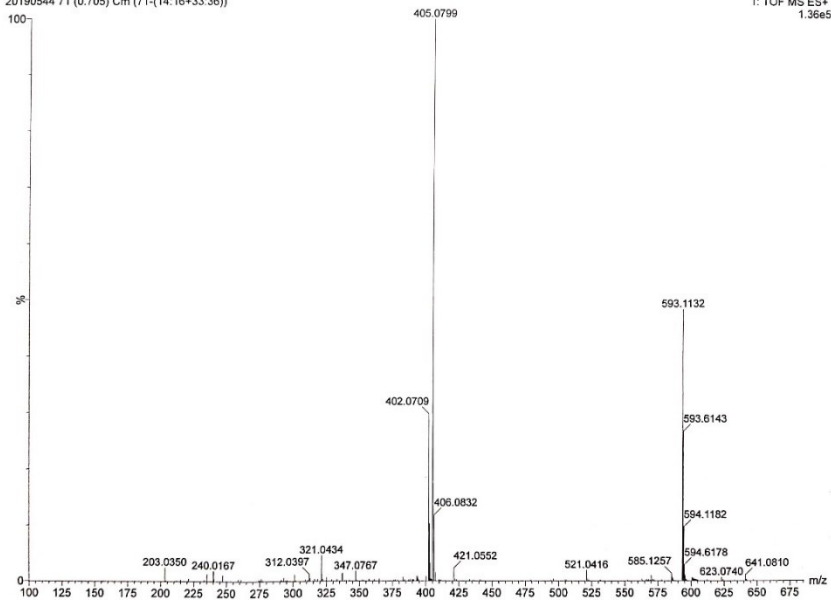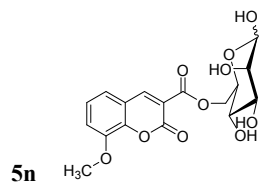

30CH+GLT  
20190545 145 (1.438) Cm (145-(16.18+21.24))

XEVO-G2TOF#NotSet

15-Mar-2019 10:33:36  
1: TOF MS ES+  
7.04e5

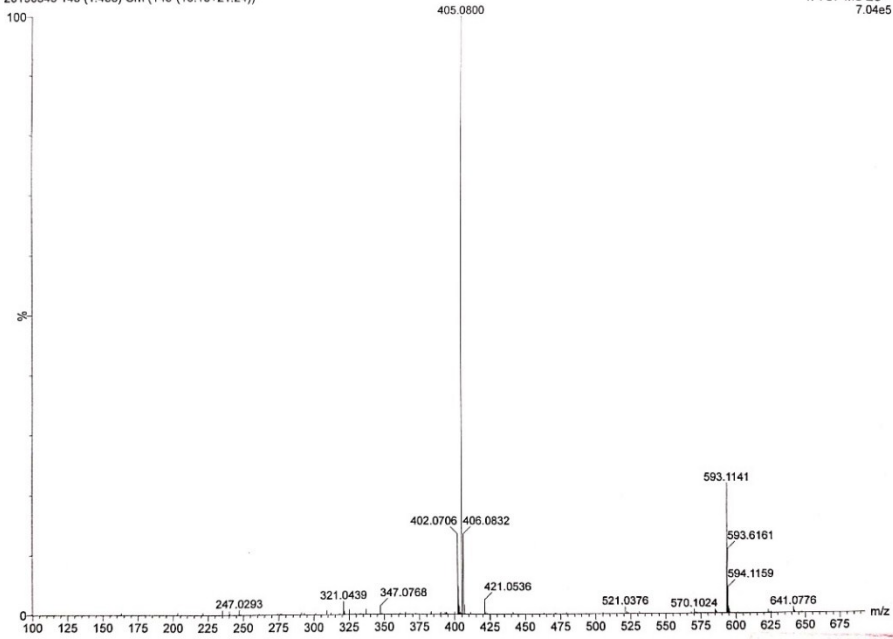

50

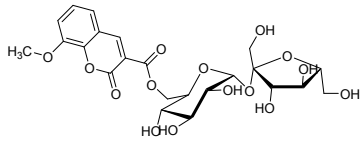

30CH+ZT

20190546 160 (1.566) Cm (160-676:678+680:682))

XEVO-G2TOF#NotSet

15-Mar-2019 10:52:49

1: TOF MS ES+  
7.93e5

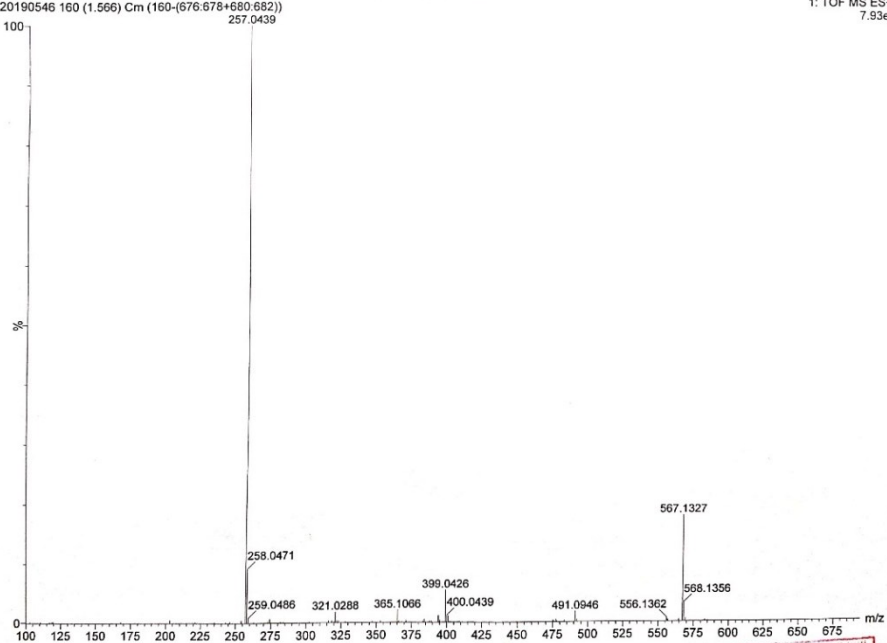

5p

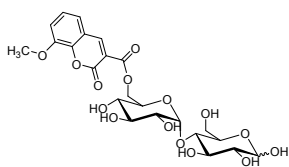

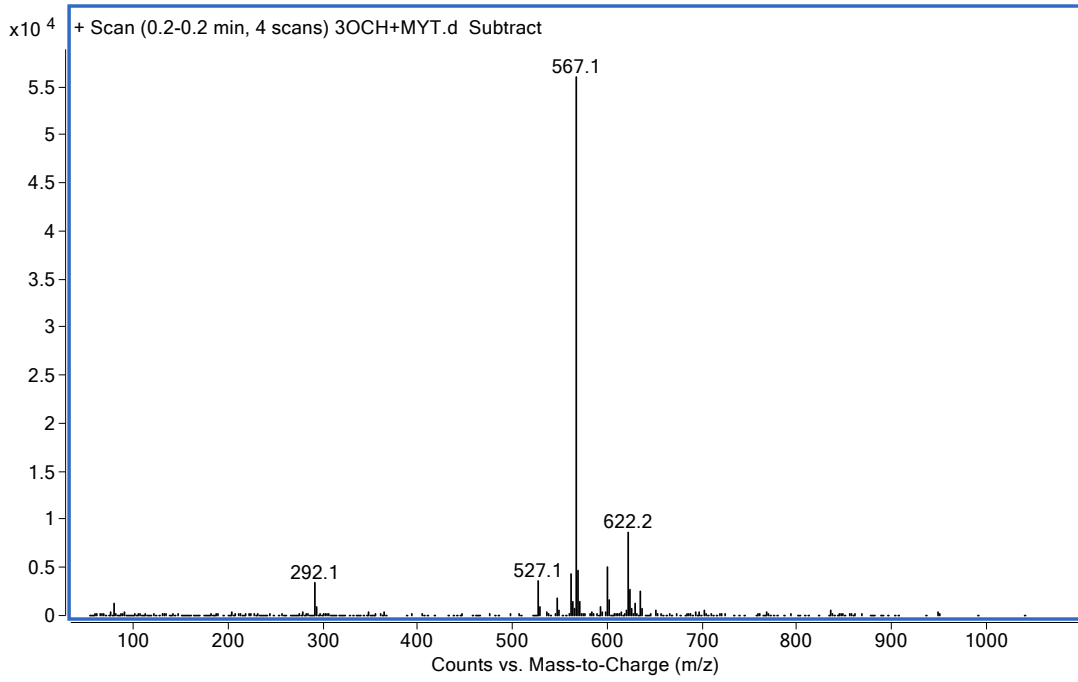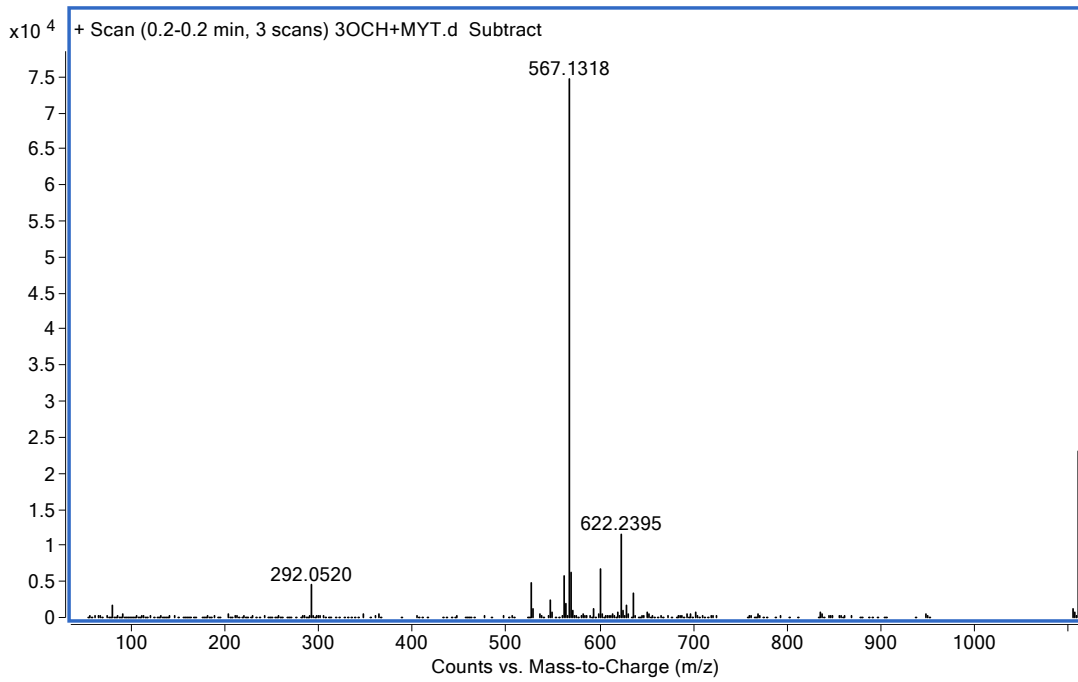

| Formula (M)                                     | Ion Formula                                        | m/z      | Calc m/z | Diff (ppm) | DBE |
|-------------------------------------------------|----------------------------------------------------|----------|----------|------------|-----|
| C <sub>23</sub> H <sub>28</sub> O <sub>15</sub> | C <sub>23</sub> H <sub>28</sub> Na O <sub>15</sub> | 567.1318 | 567.132  | 0.44       | 10  |

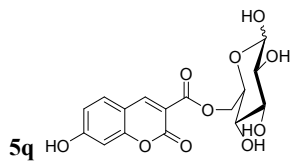

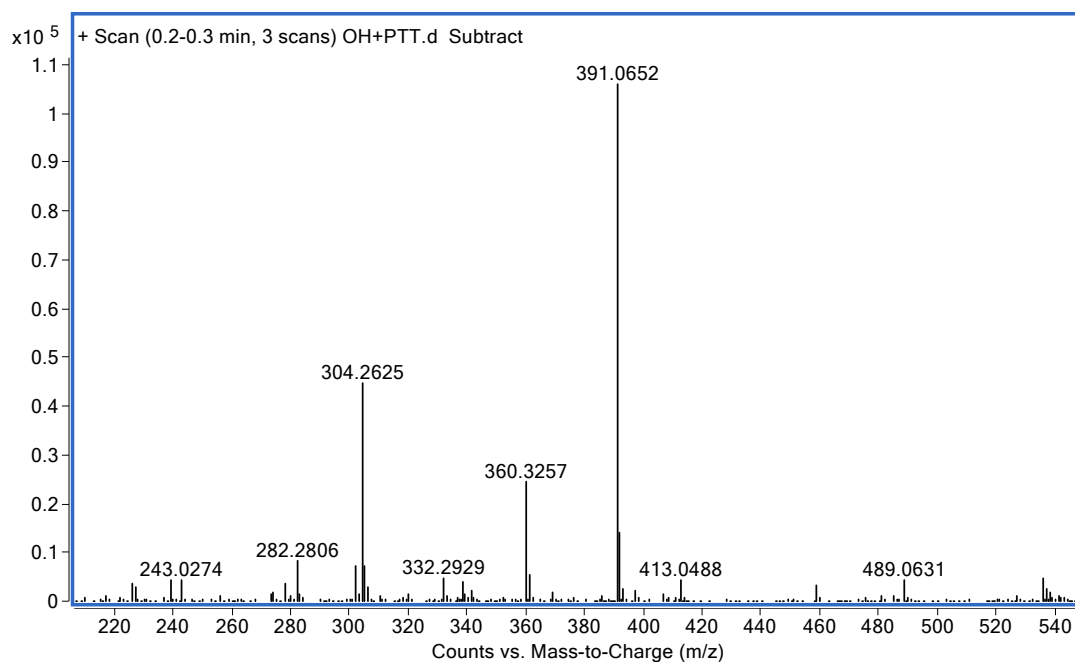

| Formula (M) | Ion Formula    | m/z      | Calc m/z | Diff (ppm) |
|-------------|----------------|----------|----------|------------|
| C16 H16 O10 | C16 H16 Na O10 | 391.0652 | 391.066  | 1.98       |

### References

1. X. He, Y. Shang, Y. Zhou, Z. Yu, G. Han, W. Jin and J. Chen, *Tetrahedron*, 2015, **71**, 863-868.
2. Y. Kuang, X. Liu, L. Chang, M. Wang, L. Lin and X. Feng, *Org. Lett.*, 2011, **13**, 3814-3817.
3. J. S. Ghomi and Z. Akbarzadeh, *Ultrason Sonochem*, 2018, **40**, 78-83.
4. J. K. Augustine, A. Bombrun, B. Ramappa and C. Boodappa, *Tetrahedron Letters*, 2012, **53**, 4422-4425.
5. J. Liu, F. Wu, L. Chen, L. Zhao, Z. Zhao, M. Wang and S. Lei, *Food Chem*, 2012, **135**, 2872-2878.
